# Supplementary material for: Size-fractionation of trace elements in dusty snow from open pit bitumen mines and upgraders: collection, handling, preparation and analysis of samples from the Athabasca bituminous sands region of Alberta, Canada
Source: Royal Society of Chemistry journal article supplement (doi:10.1039/d1ea00034a), 2022-01-01

## Blank PP bottle bottom

Blank PP bottle bottom  
Acidified

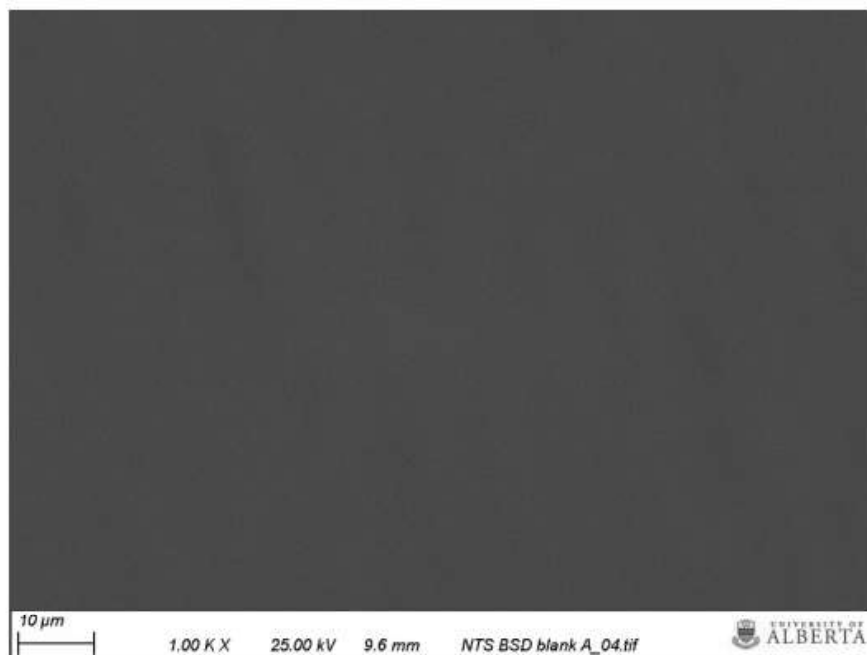

Blank PP bottle bottom  
Un-acidified

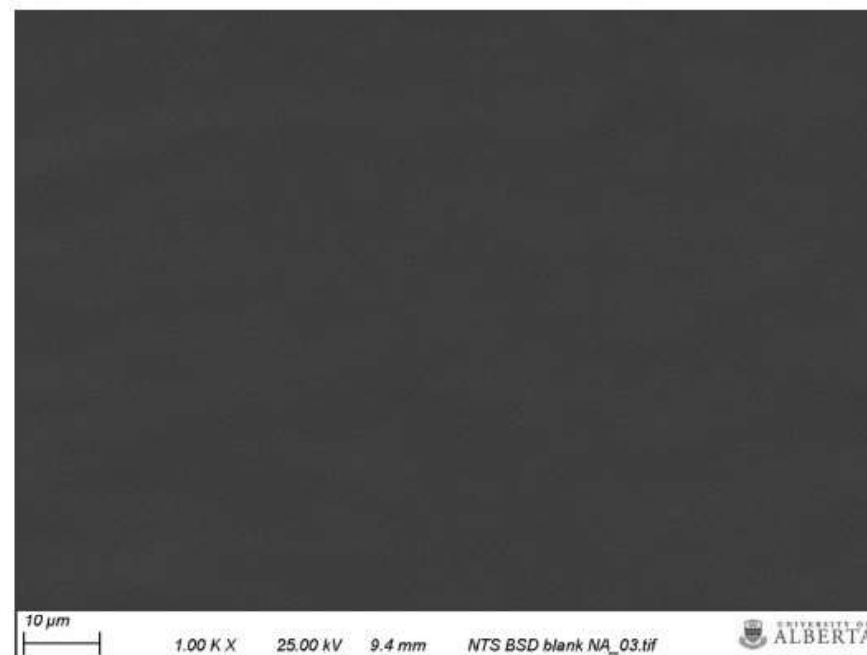

# PP bottle bottom spiked with BCR 320

PP bottle bottom spiked with BCR 320  
Acidified

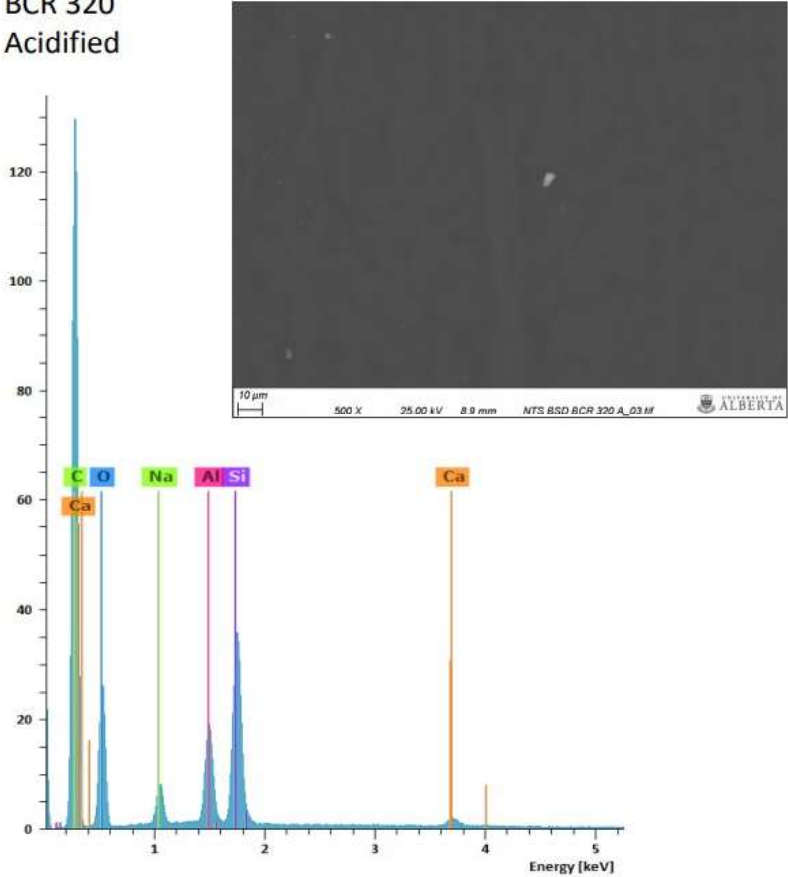

PP bottle bottom spiked with BCR 320  
Un-acidified

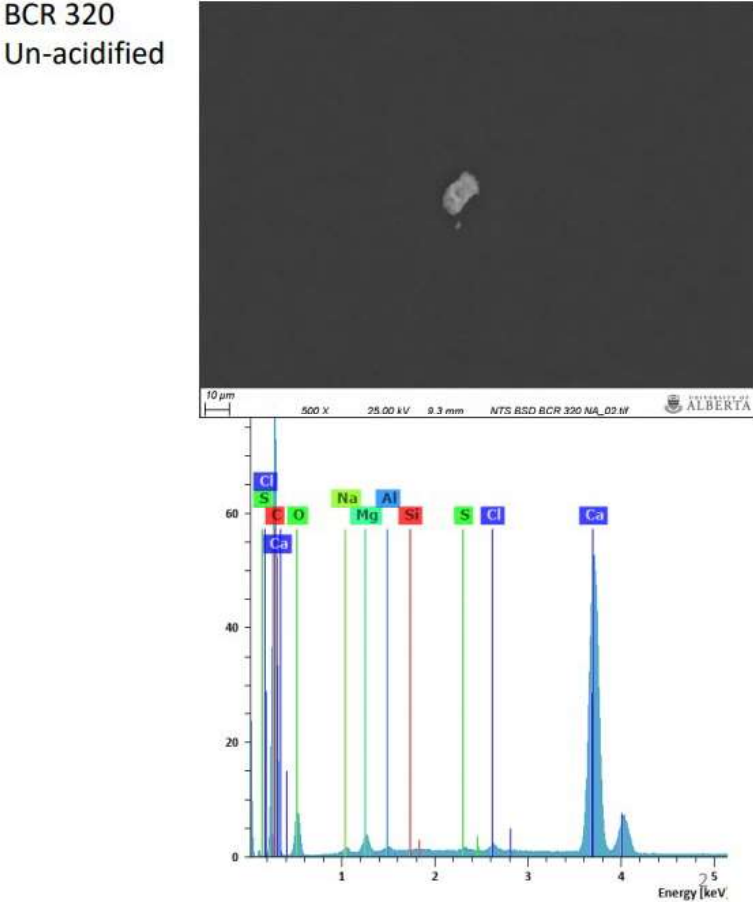

# PP bottle bottom spiked with 1633a

PP bottle bottom spiked with  
NIST 1633a  
Acidified

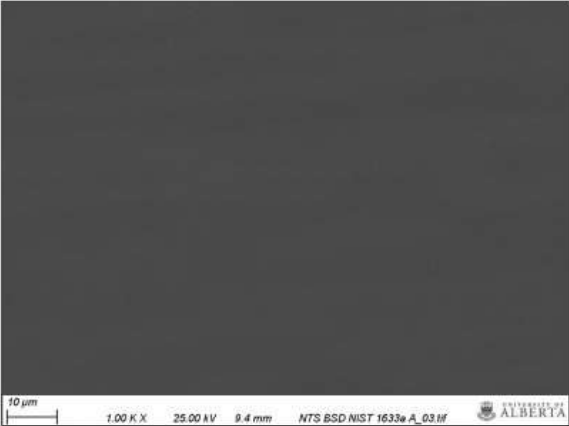

No visible particles  
No EDX acquired

PP bottle bottom spiked with  
NIST 1633a  
Un-acidified

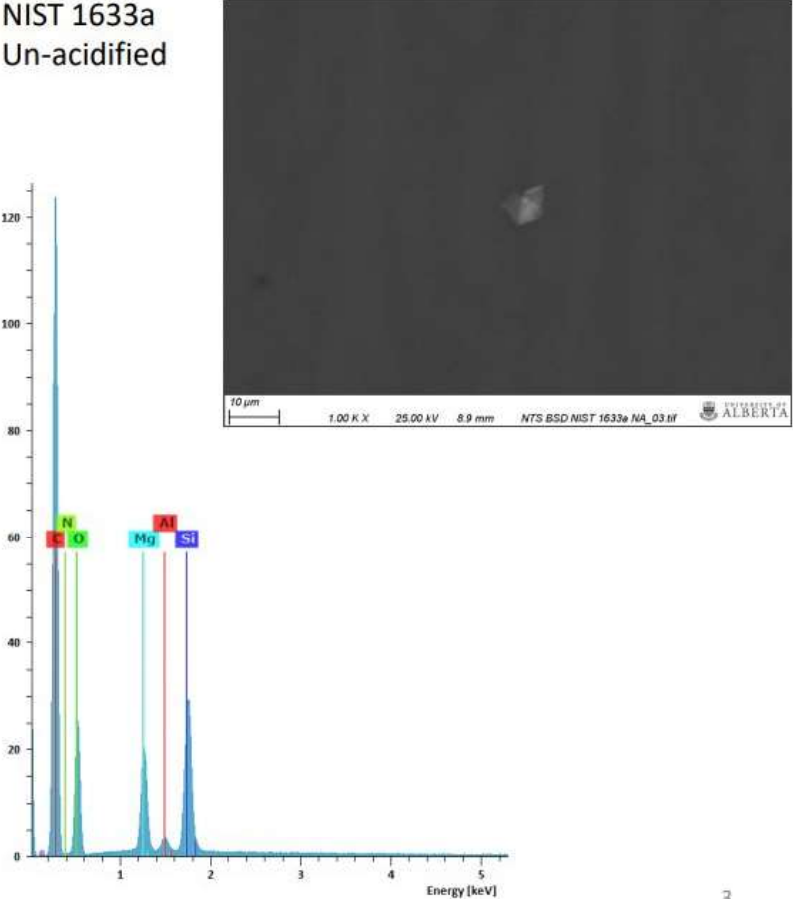

# PP bottle bottom spiked with NIST 2711

PP bottle bottom spiked with  
NIST 2711  
Acidified

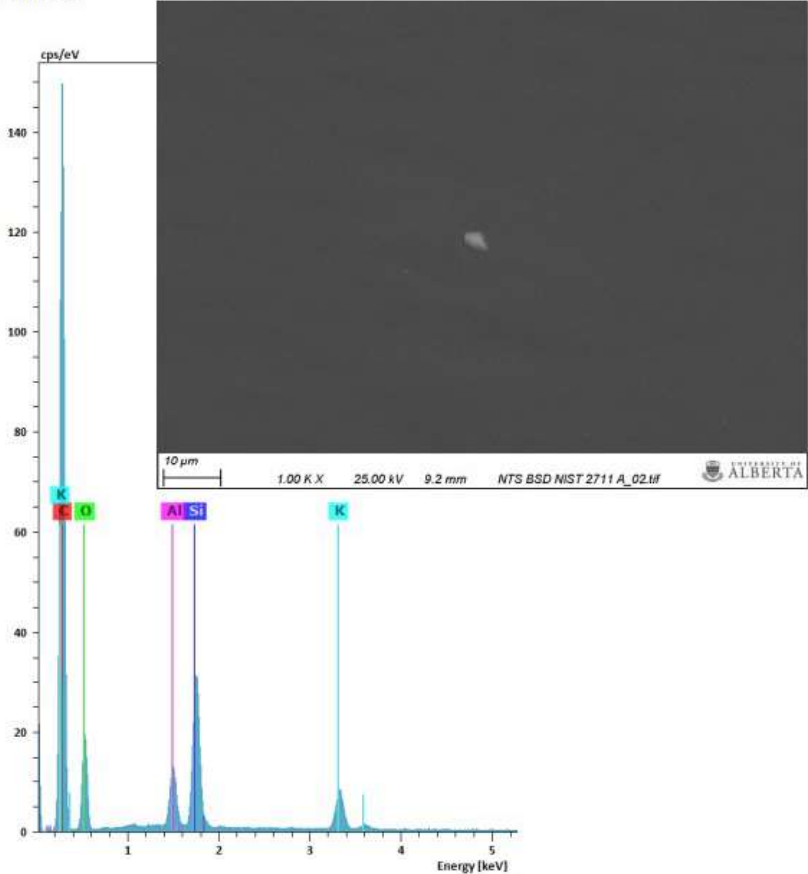

PP bottle bottom spiked with  
NIST 2711  
Un-acidified

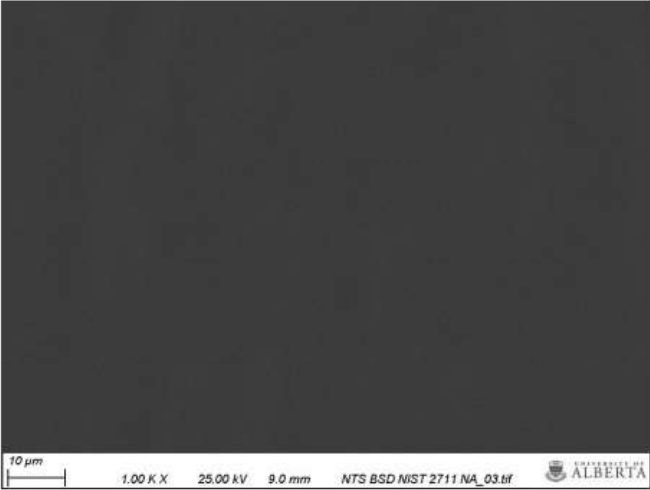

No visible particles  
No EDX acquired

# PP bottle bottom spiked with road dust

PP bottle bottom spiked with Road dust Acidified

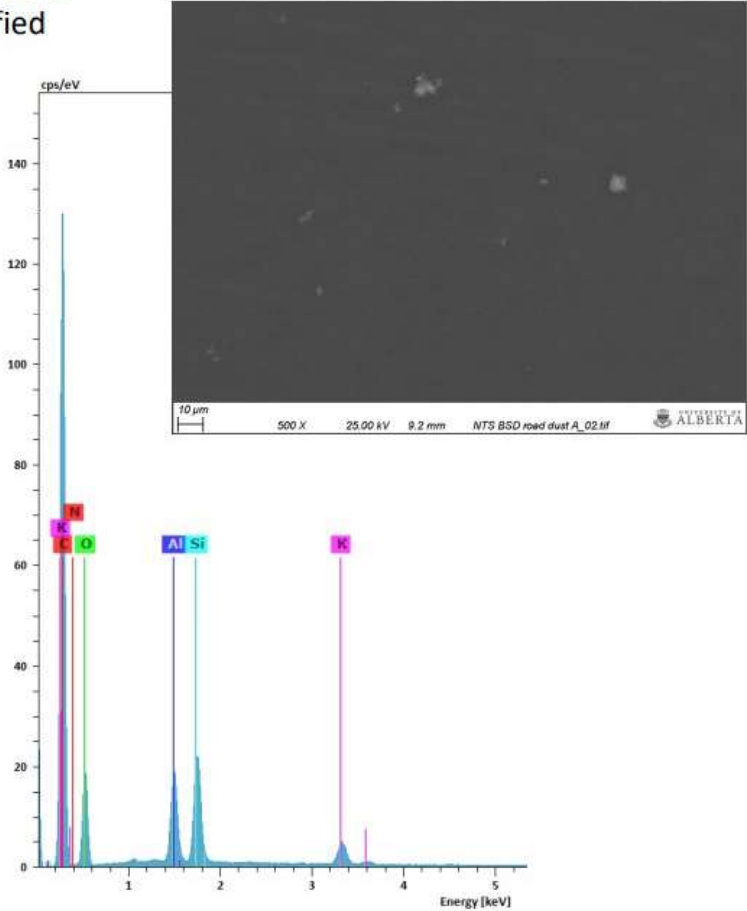

PP bottle bottom spiked with Road dust Un-acidified

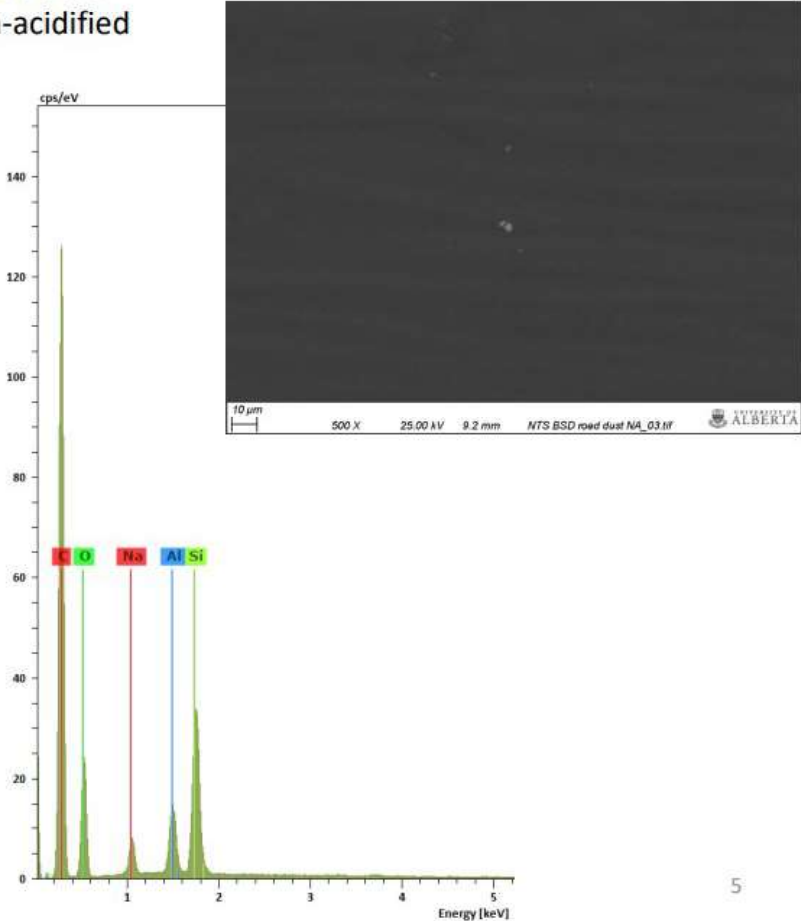

# Syringe blank

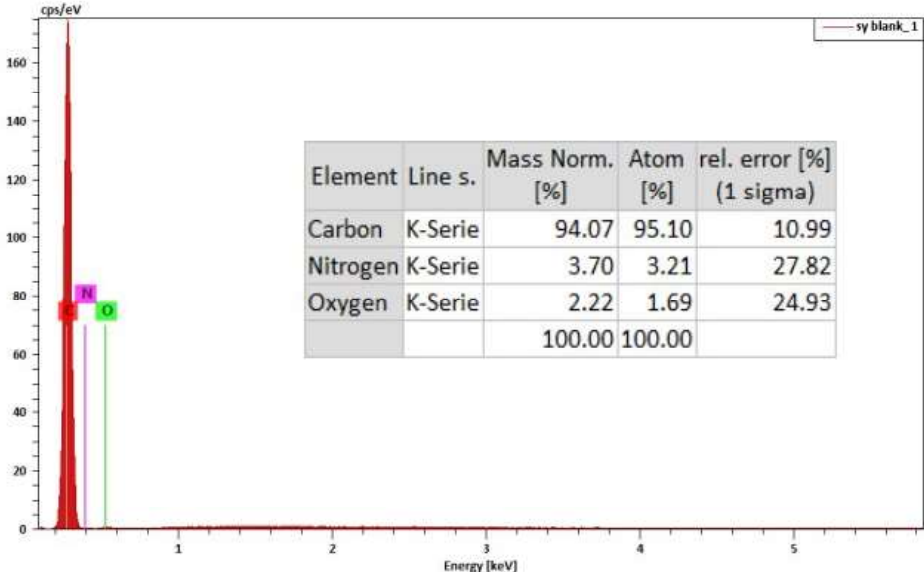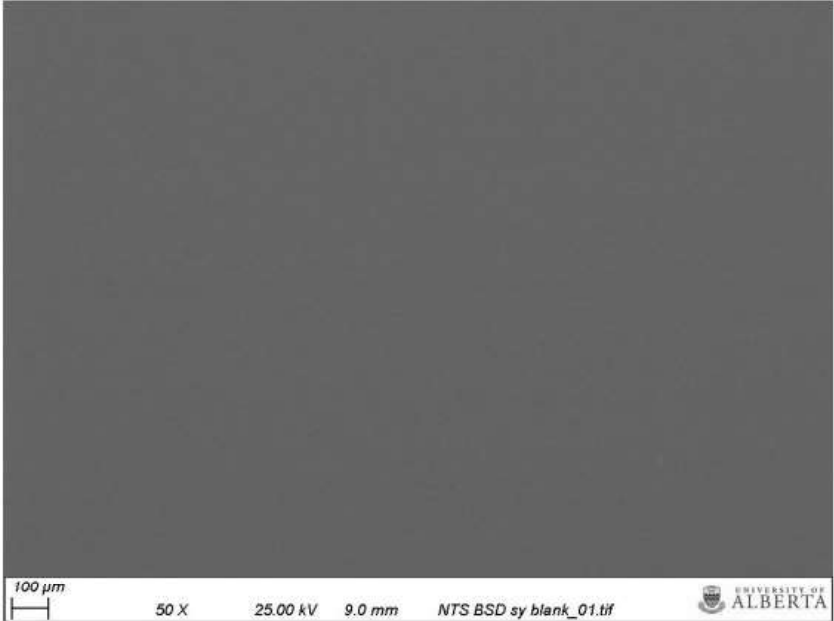

# Syringe used for NIST 1633a (Unacidified)-1

Syringe used for snow sample spiked with NIST 1633a  
Un acidified

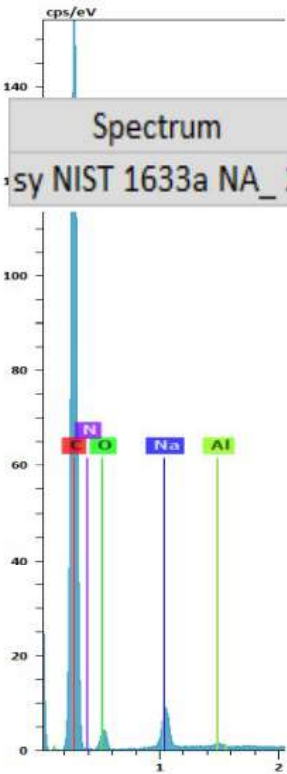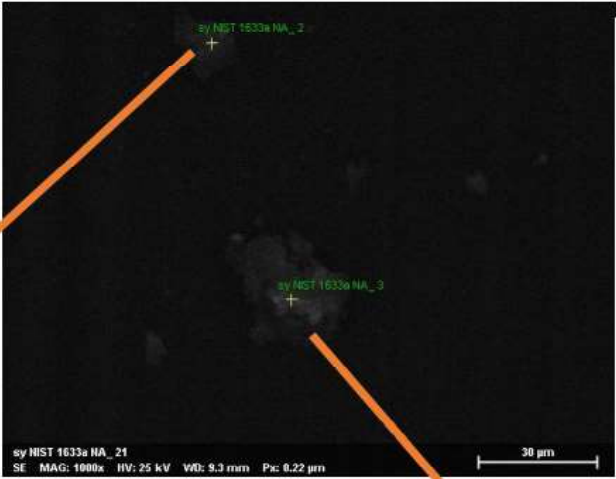

| Spectrum           | C     | N    | O     | Na   | Al   |
|--------------------|-------|------|-------|------|------|
| sy NIST 1633a NA_3 | 84.40 | 3.78 | 10.18 | 1.54 | 0.10 |

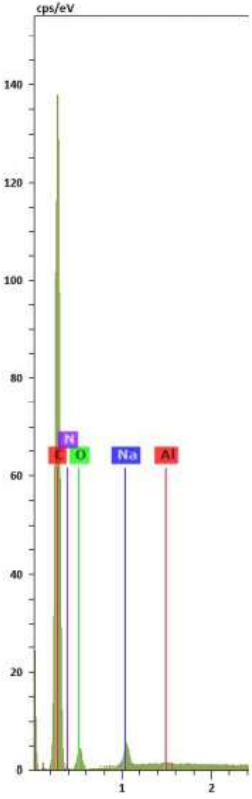

# Syringe used for NIST 1633a (Unacidified)-2

Syringe used for snow sample spiked with NIST 1633a  
Unacidified

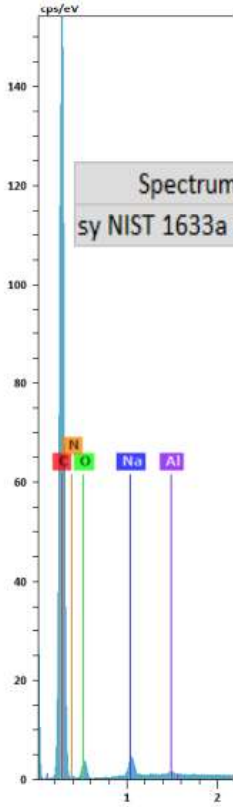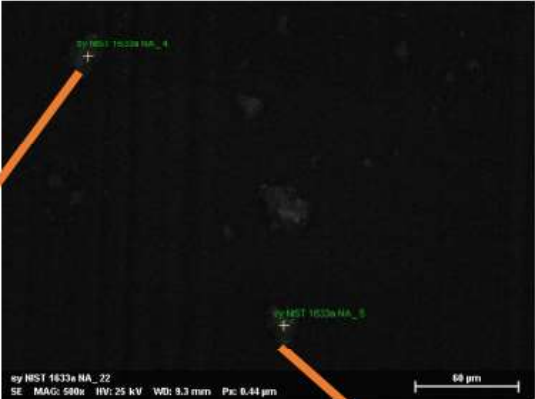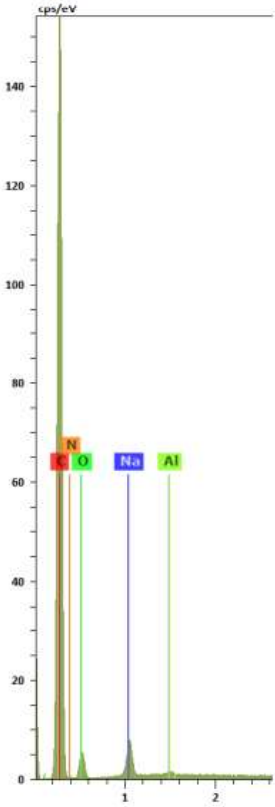



# Syringe used for NIST 1633a (Unacidified)-3

Syringe used for snow sample spiked with NIST 1633a  
Un acidified

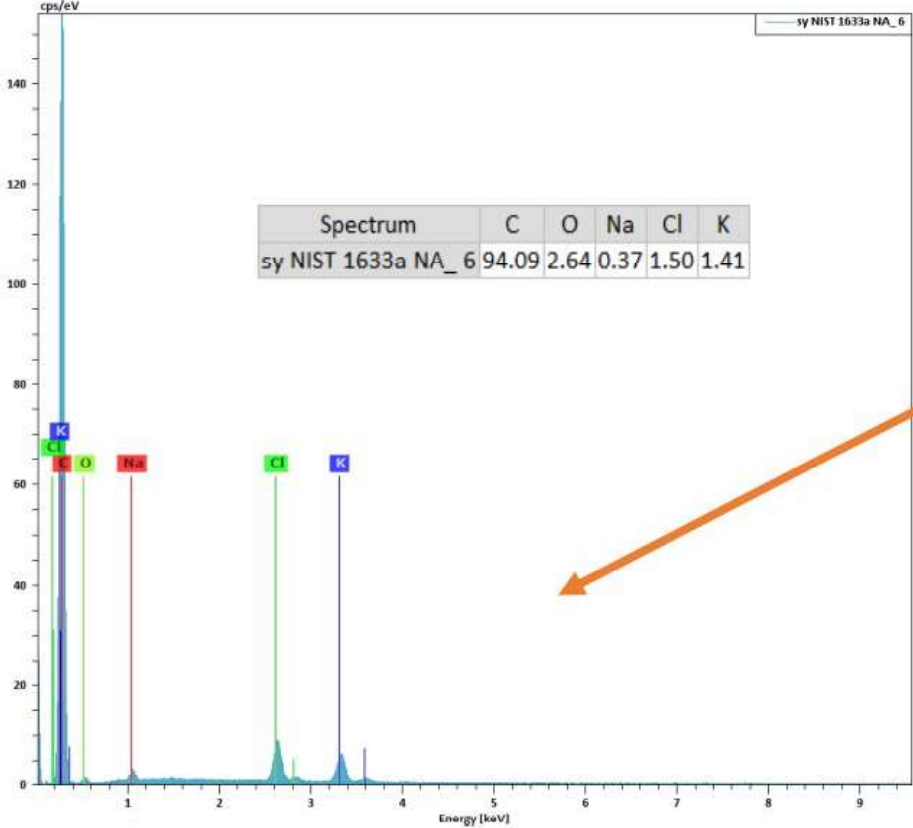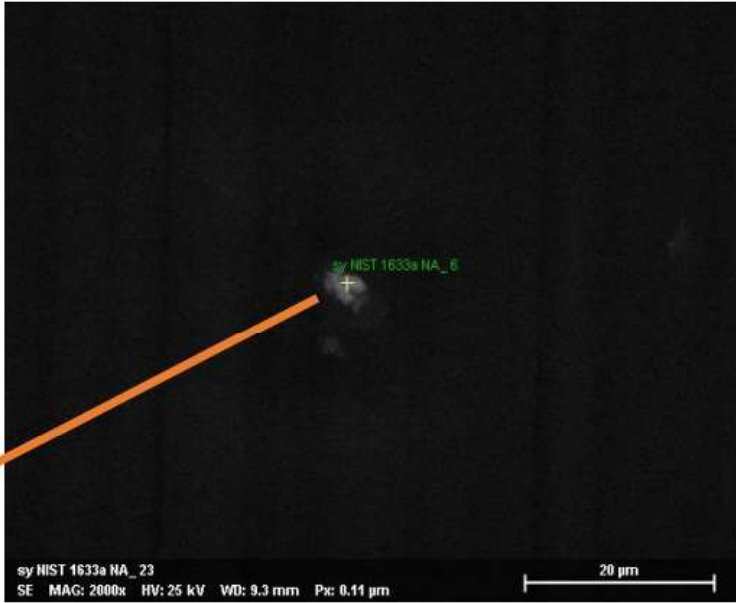

# Syringe used for NIST 2711 (Unacidified)-1

Syringe used for snow sample spiked with NIST 2711  
Un acidified

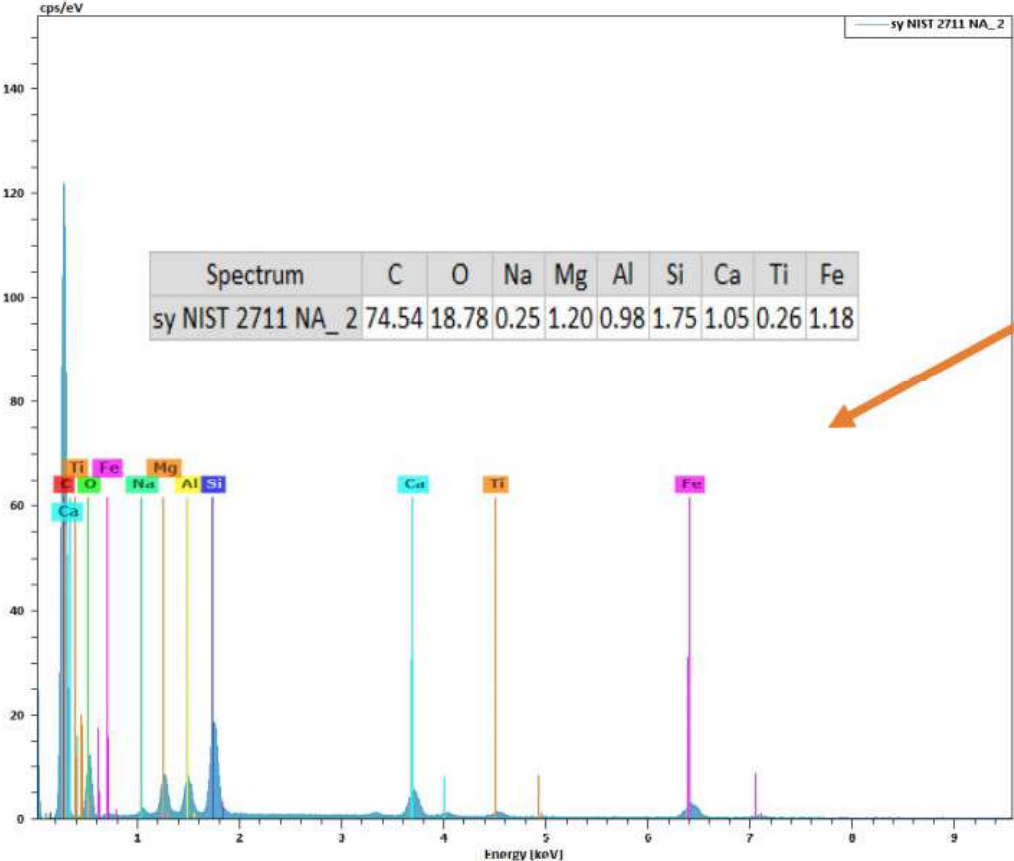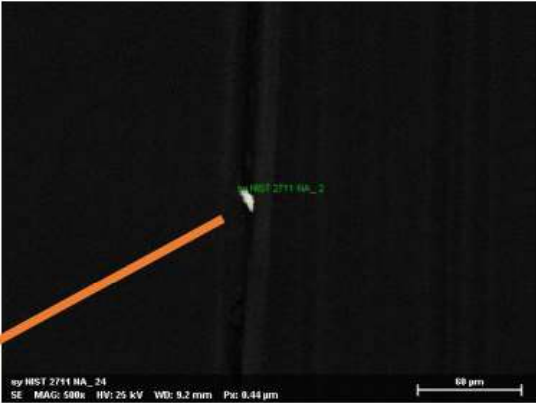

# Syringe used for NIST 2711 (Unacidified)-2

Syringe used for snow sample spiked with NIST 2711  
Un acidified

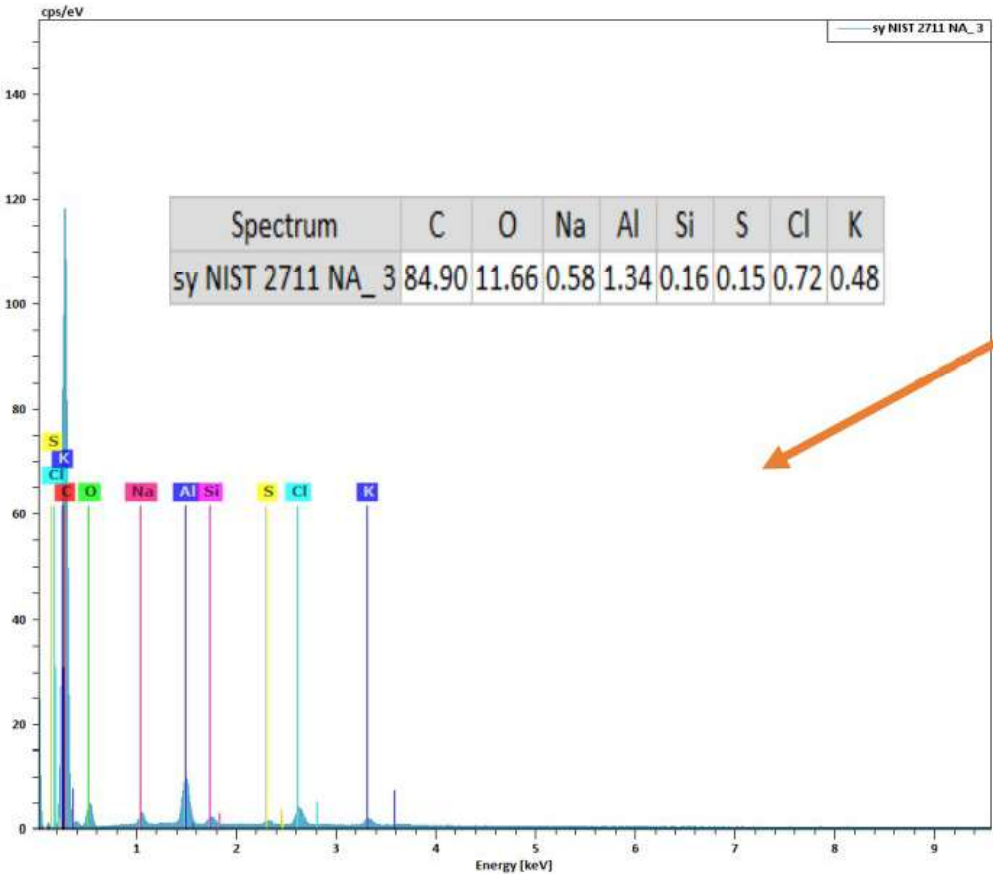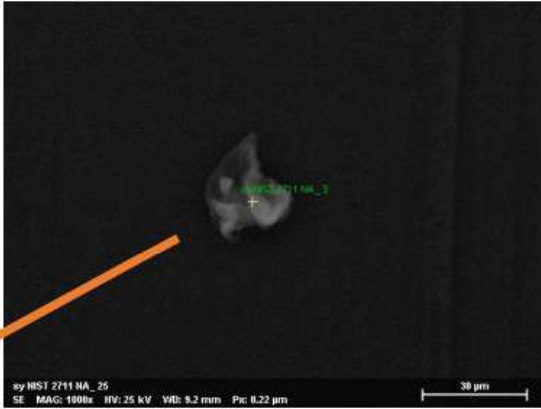

# Syringe used for NIST 2711 (Unacidified)-3

Syringe used for snow sample spiked with NIST 2711  
Un acidified

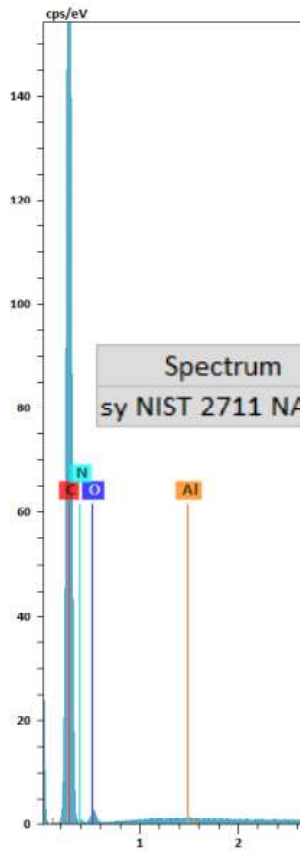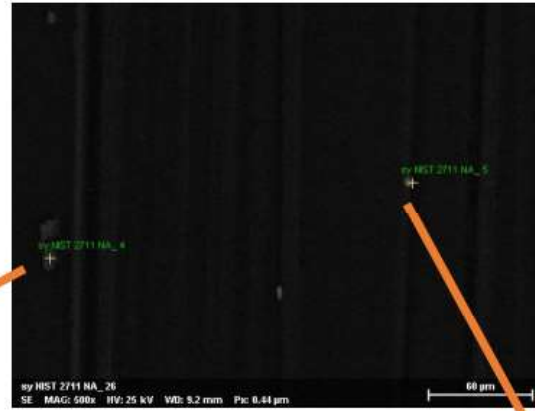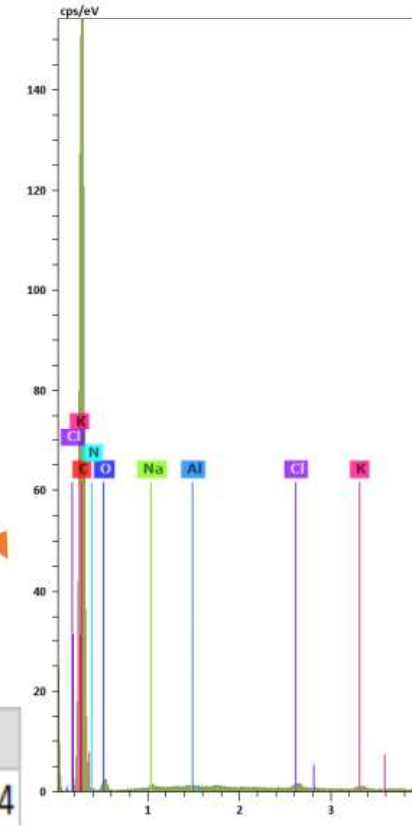

# Syringe used for NIST 1633a (Acidified)-1

Syringe used for snow sample spiked with NIST 1633a  
Acidified

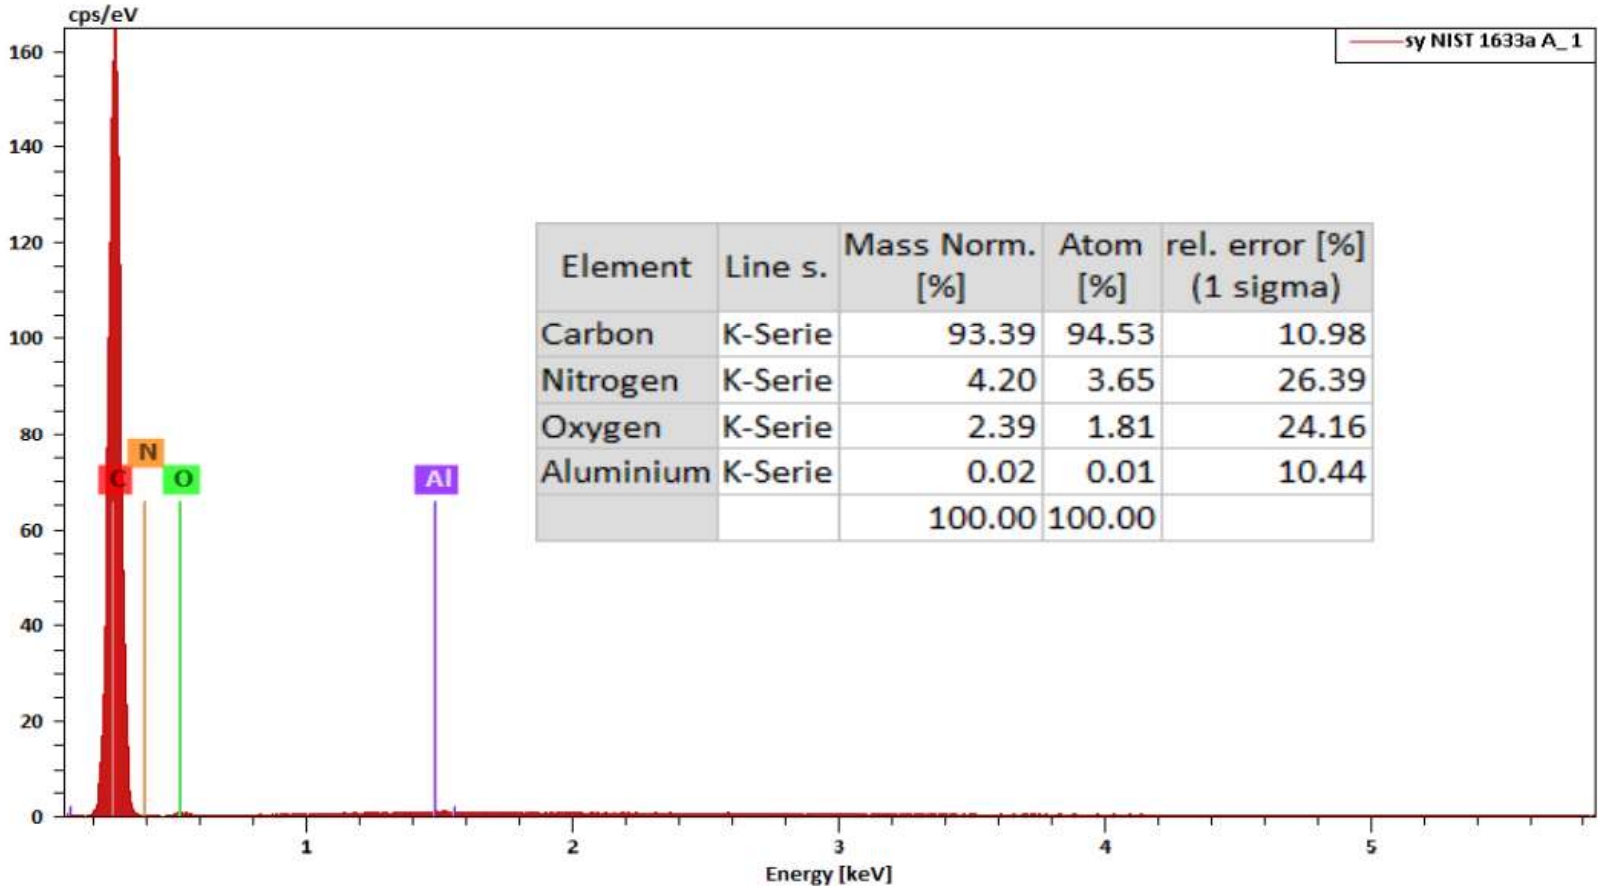

# Syringe used for NIST 1633a (Acidified)-2

Syringe used for snow sample spiked with NIST 1633a Acidified

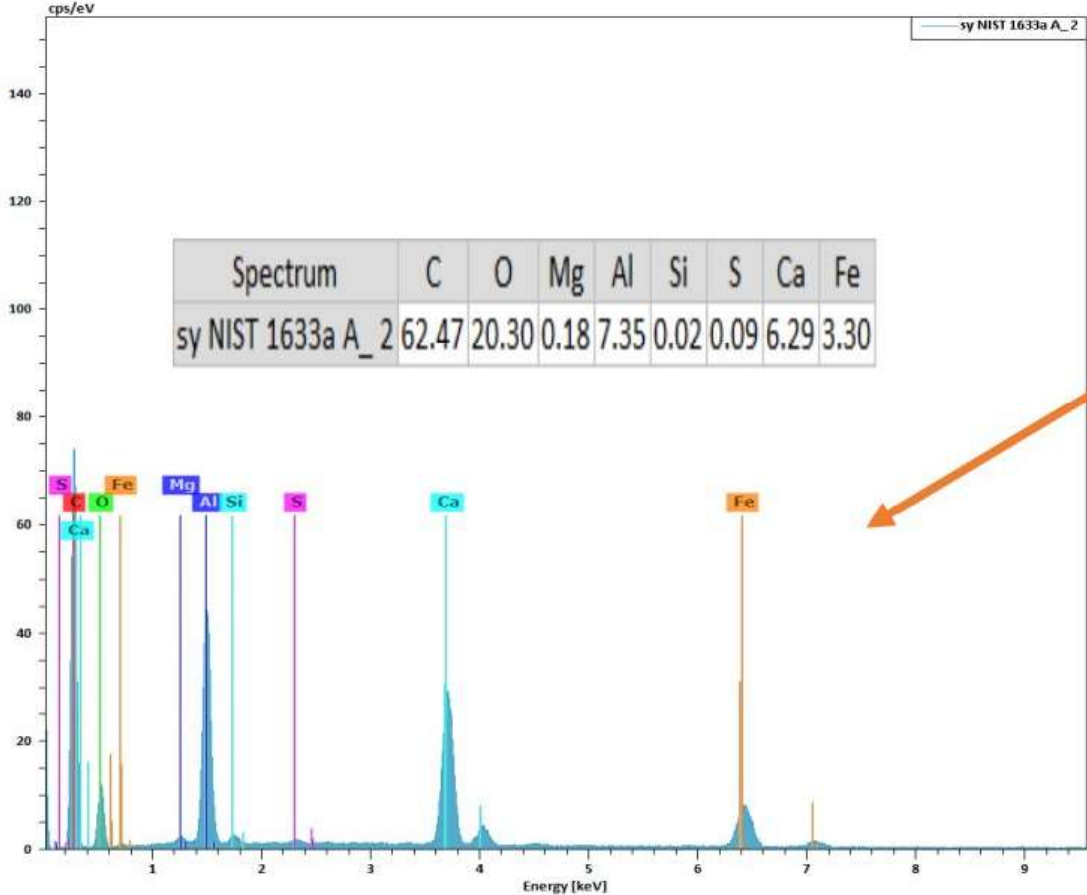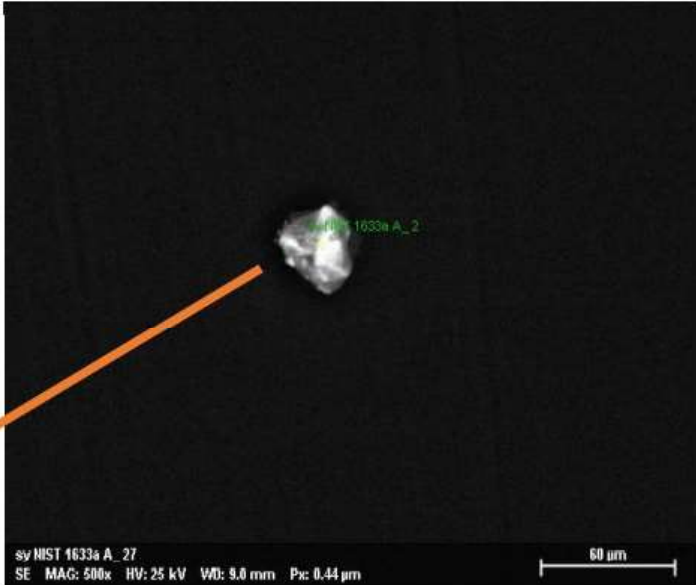

# Syringe used for NIST 1633a (Acidified)-3

Syringe used for snow sample spiked with NIST 1633a Acidified

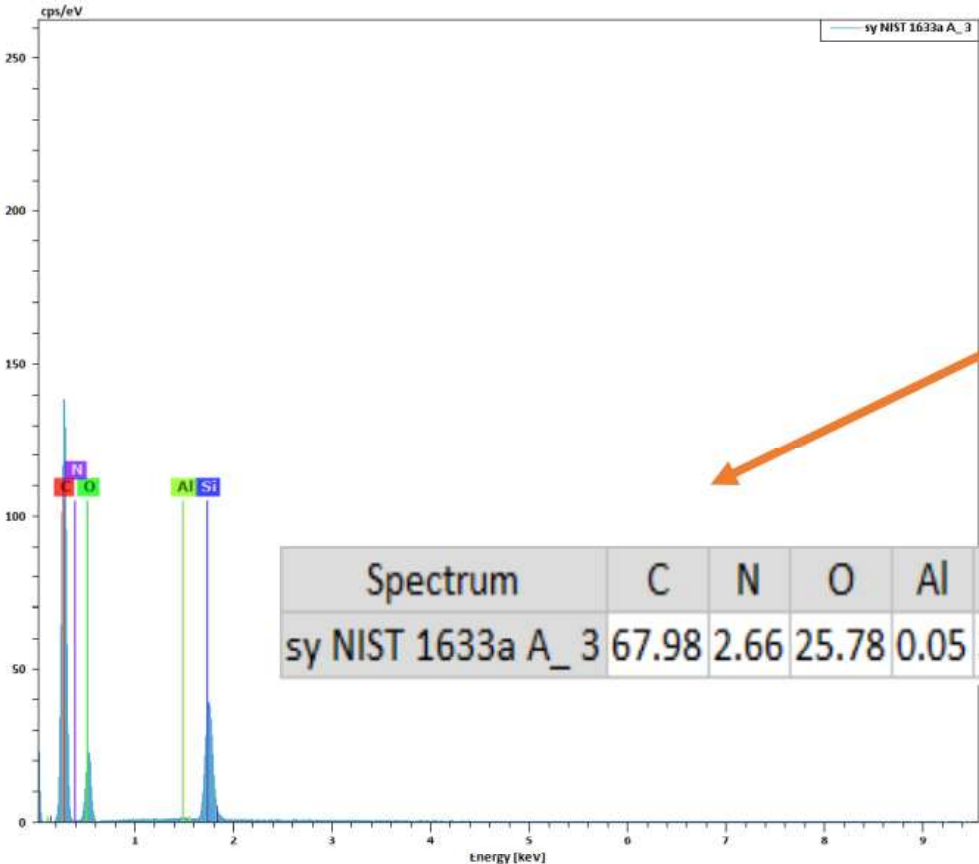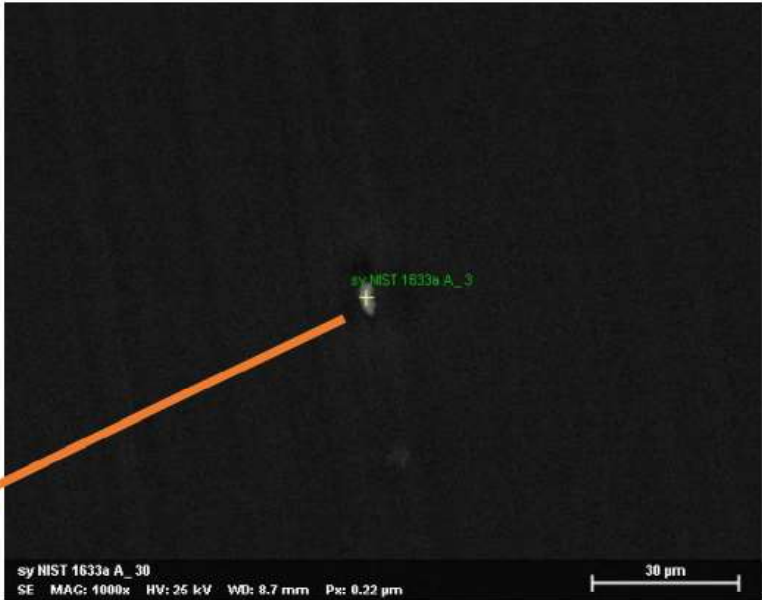

# Syringe used for NIST 2711 (Acidified)-1

Syringe used for snow sample spiked with NIST 2711  
Acidified

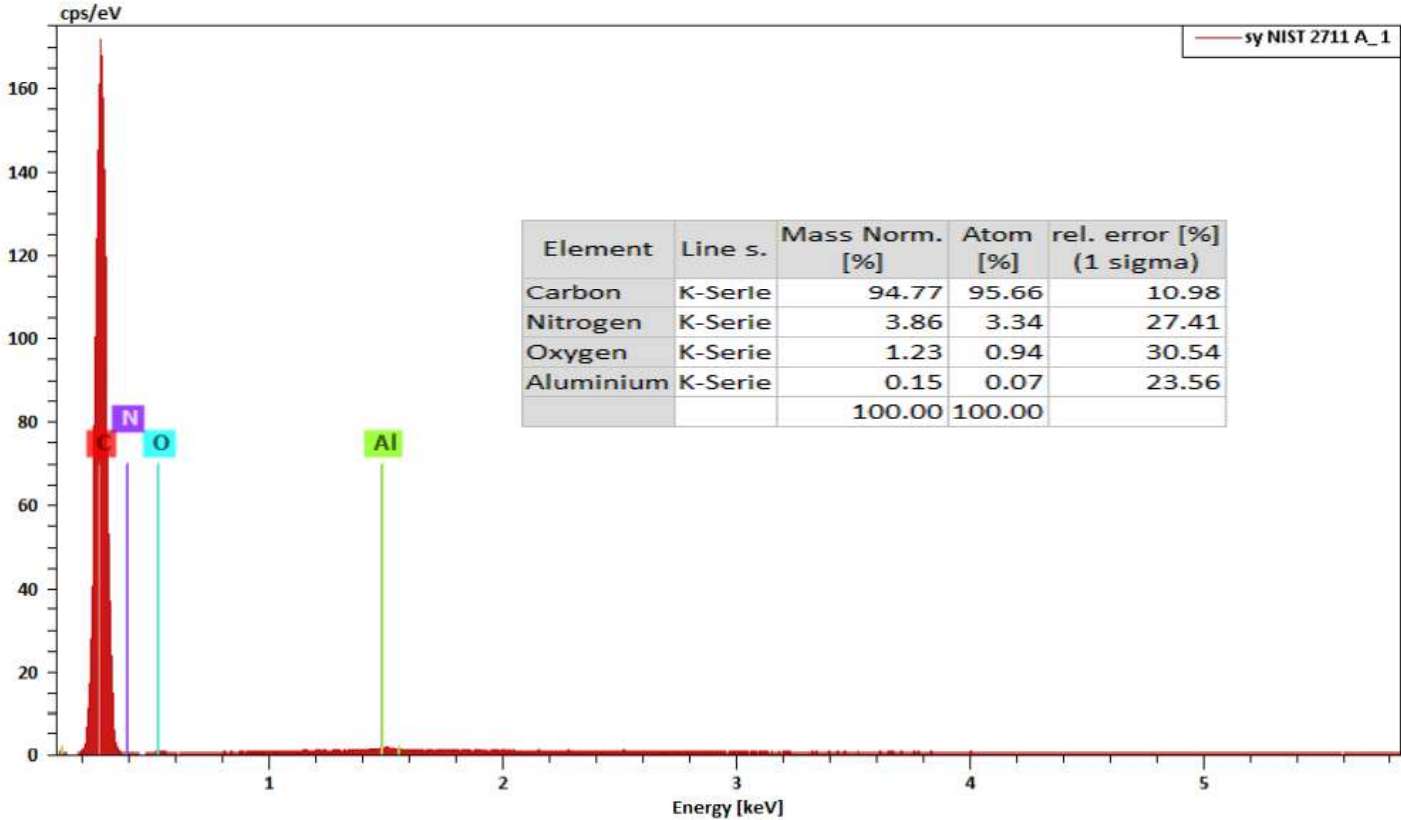



# Syringe used for NIST 2711 (Acidified)-2

Syringe used for snow sample spiked with NIST 2711  
Acidified

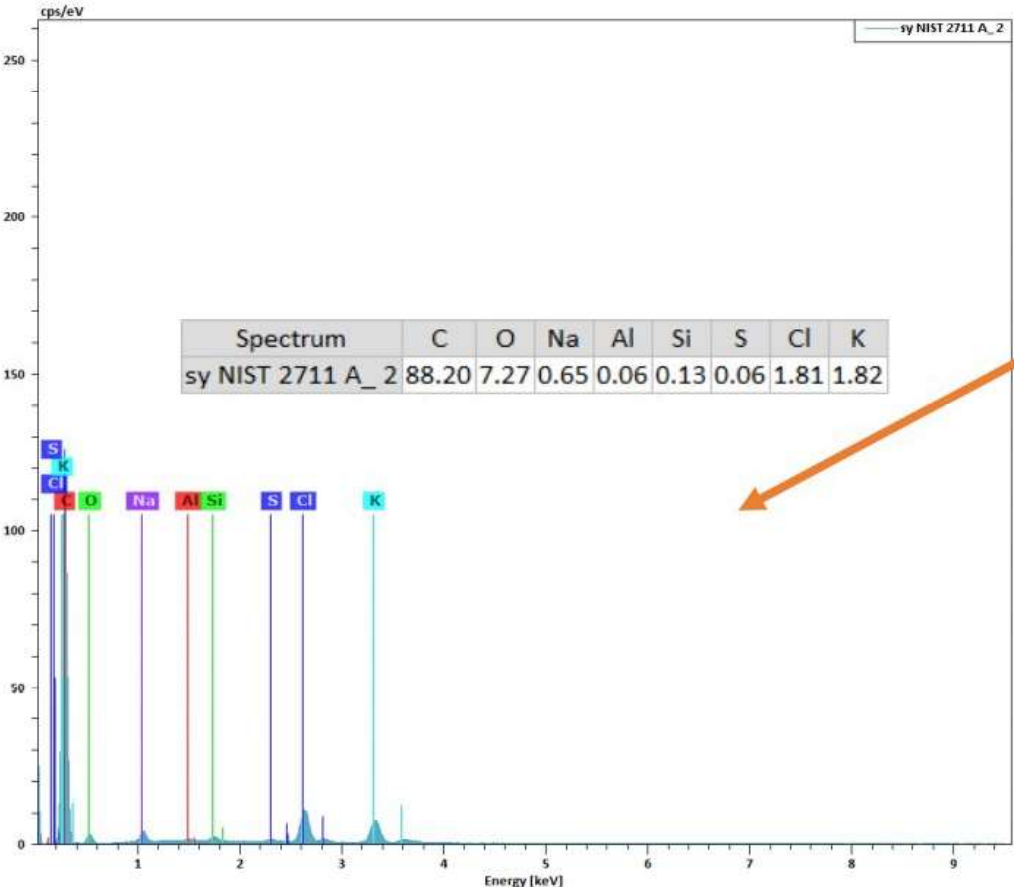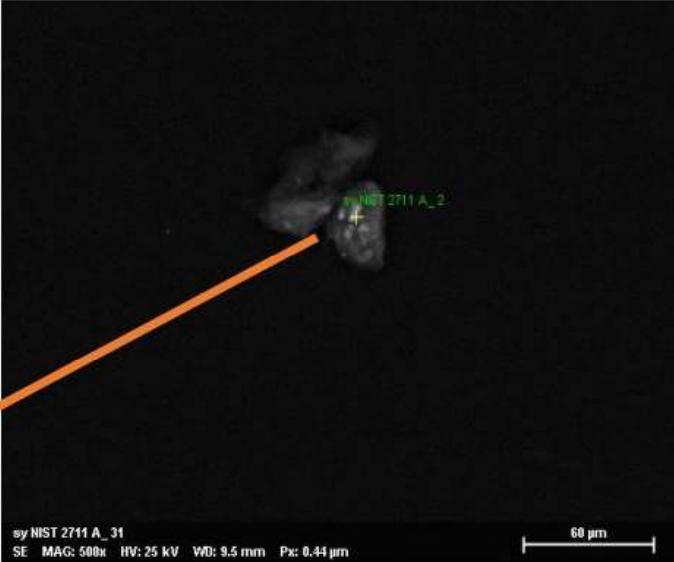

# Syringe used for NIST 2711 (Acidified)-3

Syringe used for snow sample spiked with NIST 2711  
Acidified

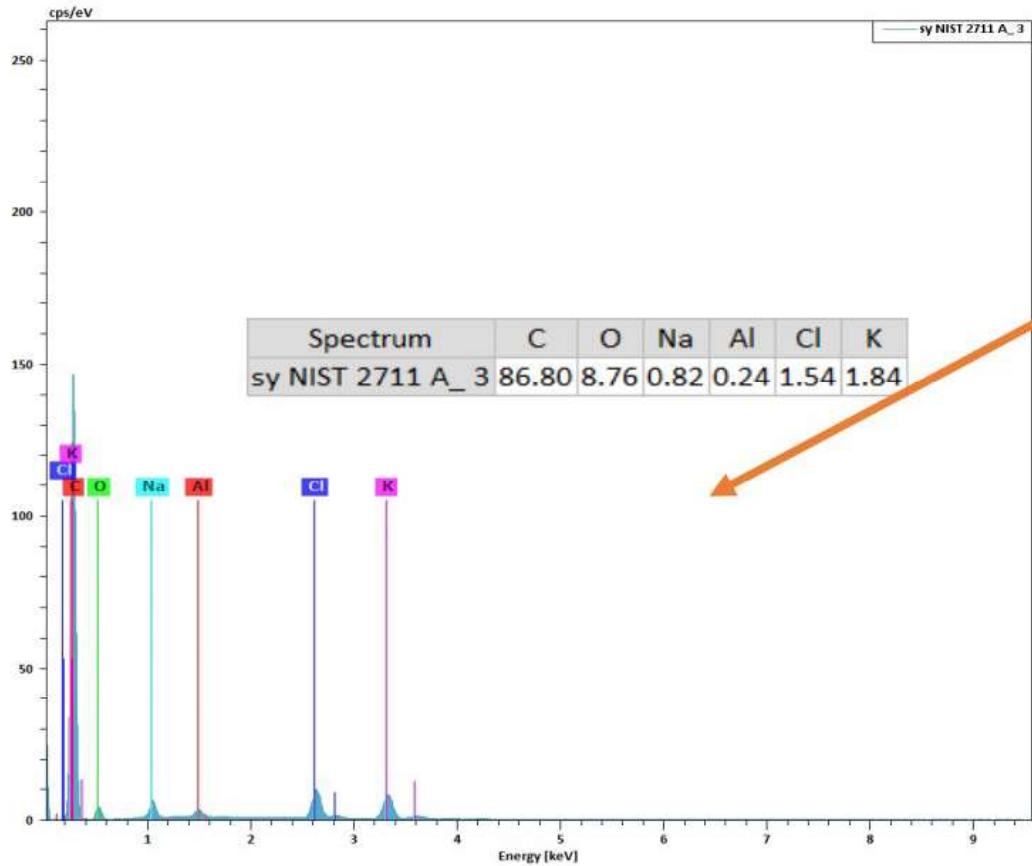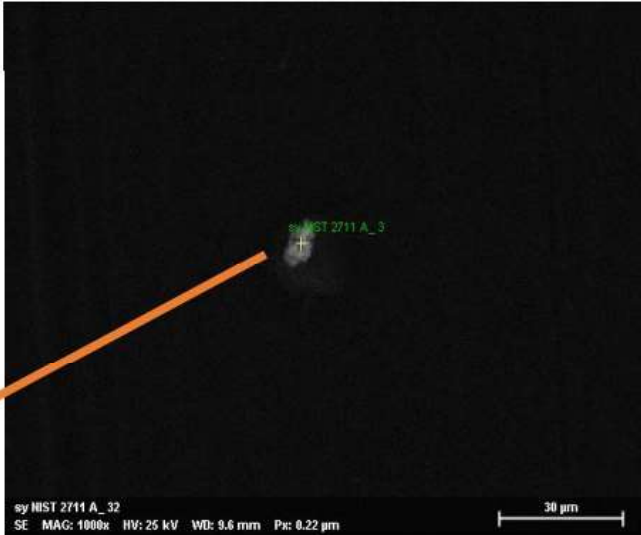

Supplement: d1ea00034a1.pdf [file d1ea00034a1.pdf]
