# Supplementary material for: Size-fractionation of trace elements in dusty snow from open pit bitumen mines and upgraders: collection, handling, preparation and analysis of samples from the Athabasca bituminous sands region of Alberta, Canada
Source: Royal Society of Chemistry journal article supplement (doi:10.1039/d1ea00034a), 2022-01-01

# SEM-EDX of dust extracted from snow from the Athabasca Bituminous Sands region

# ANZ-1

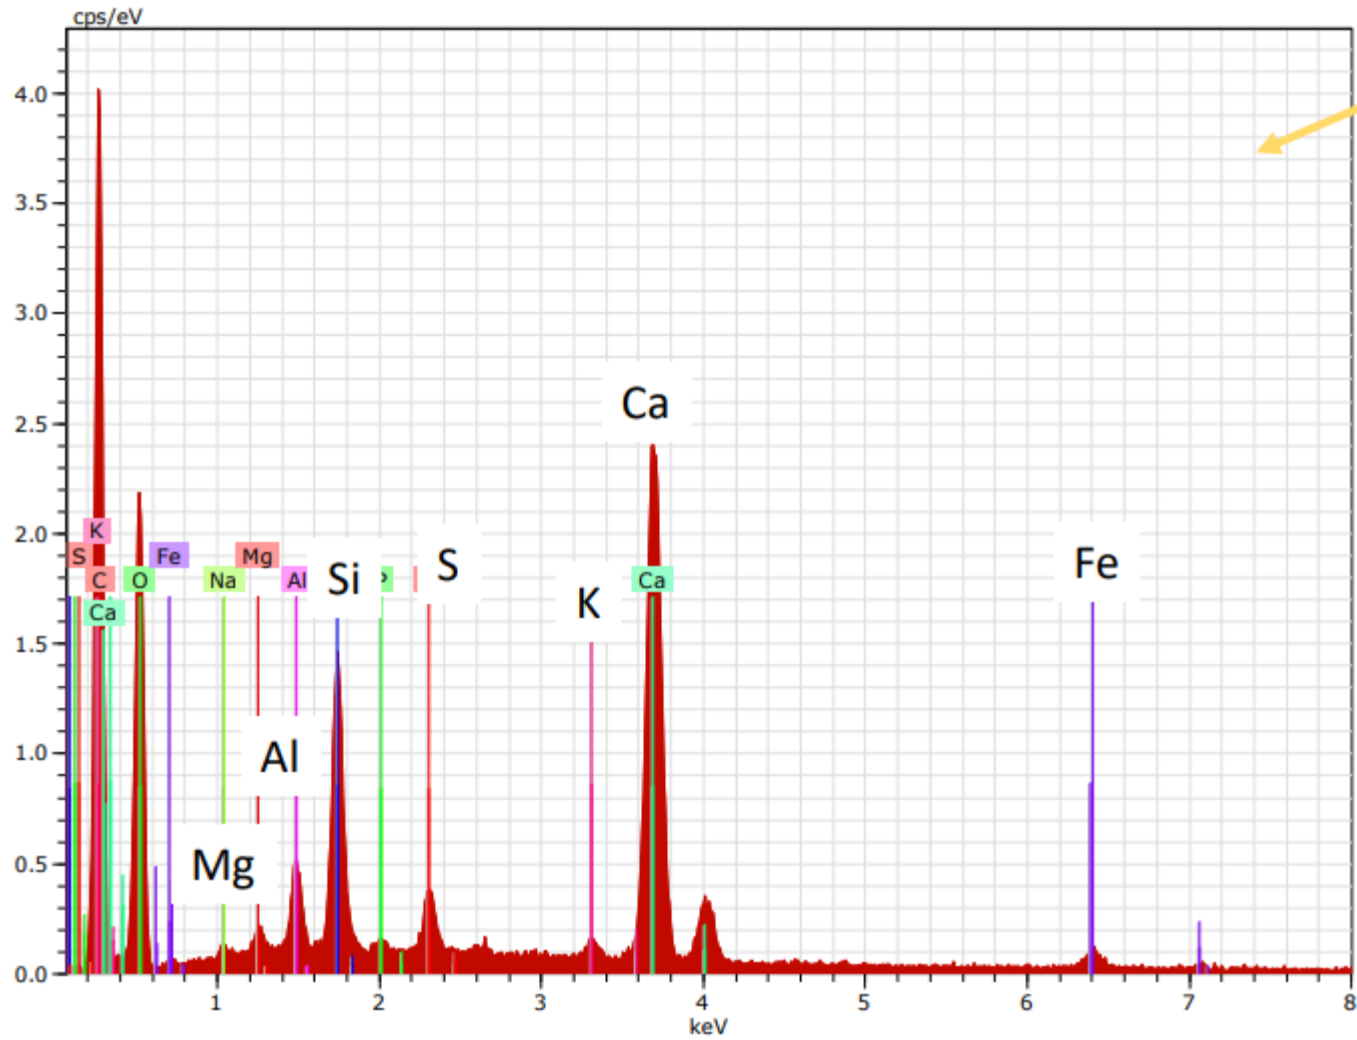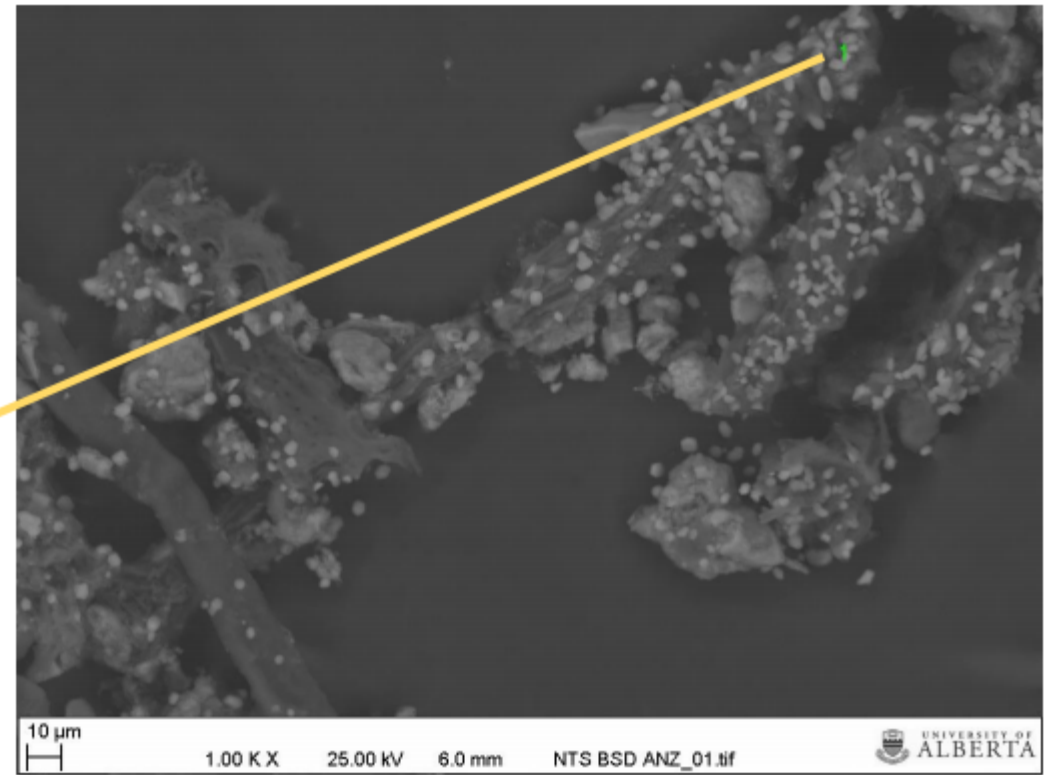

# ANZ-2

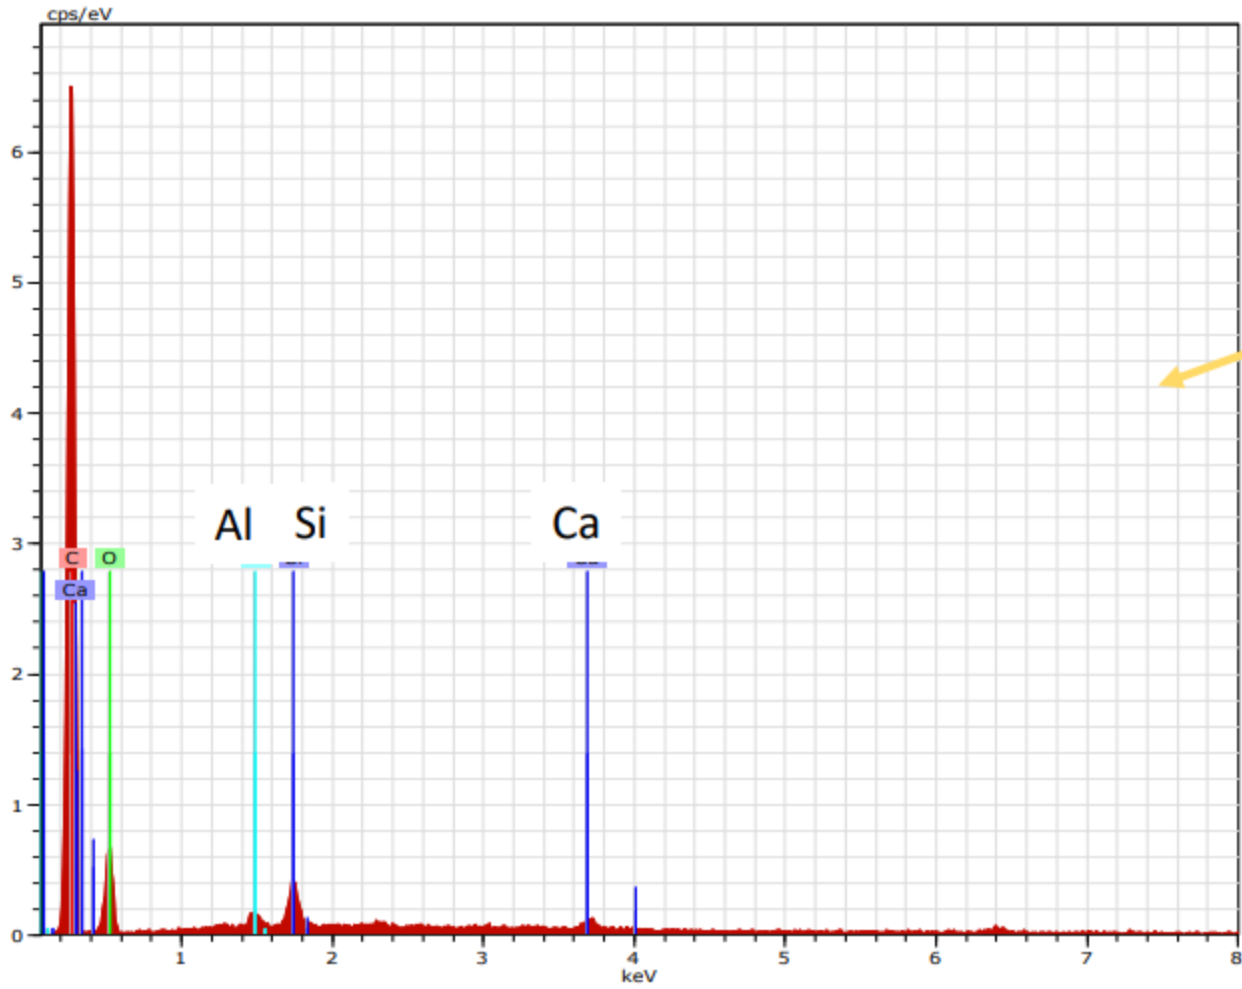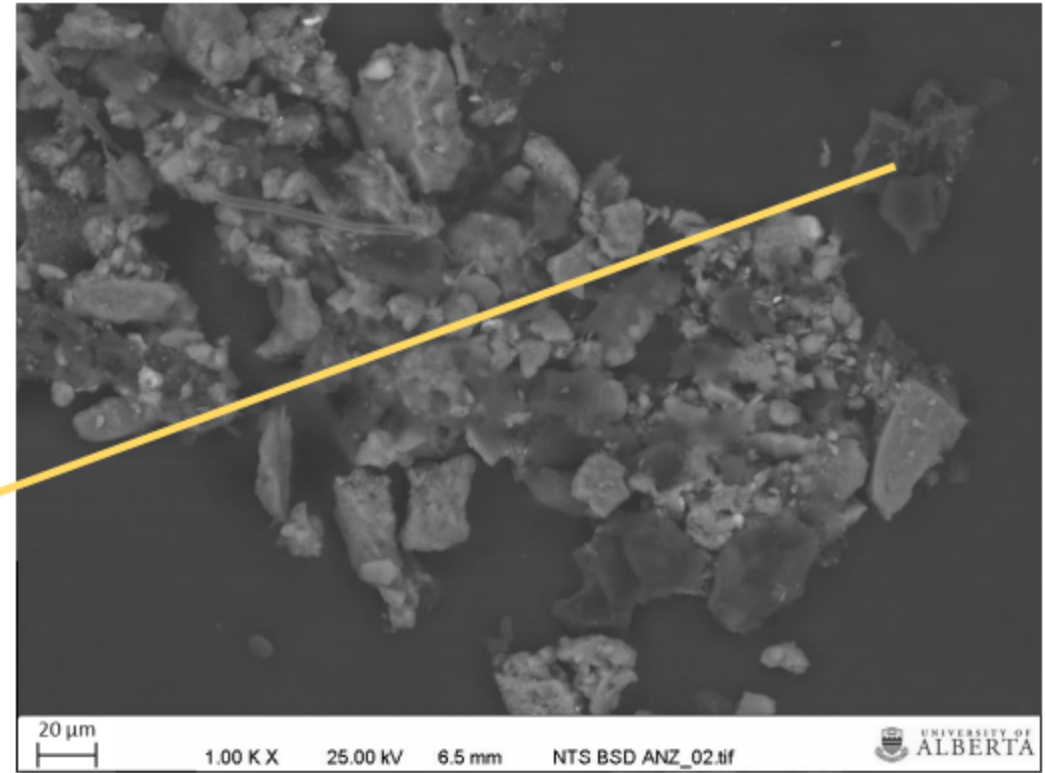

# ANZ-3

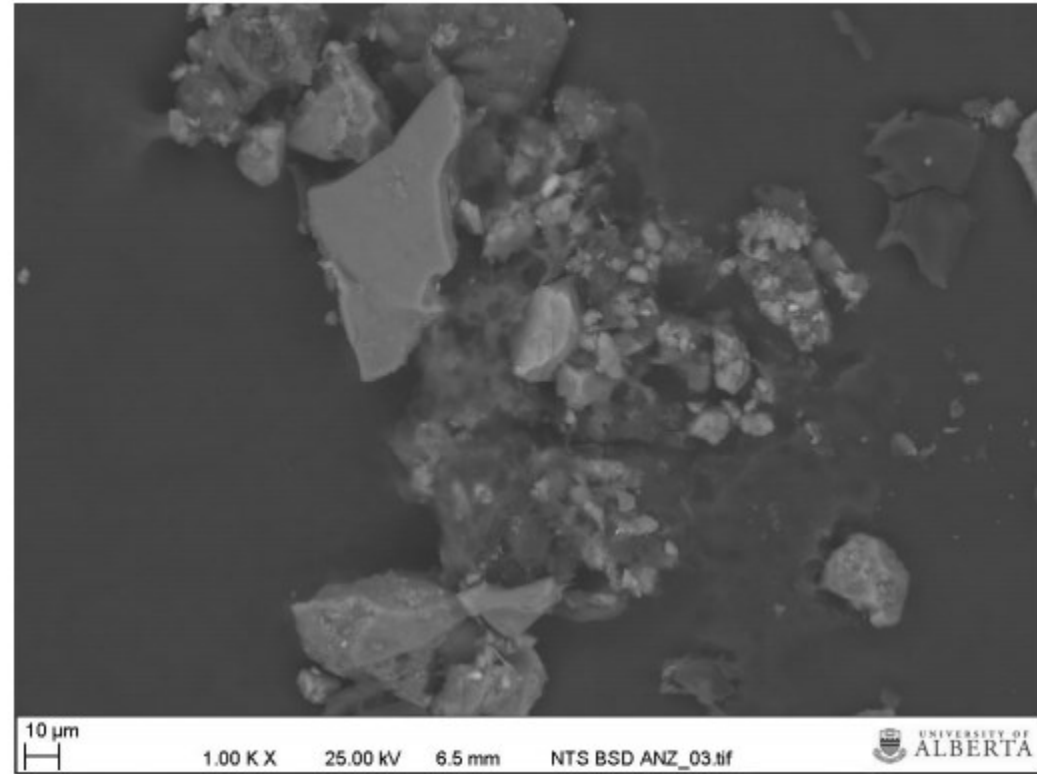

# ANZ-4

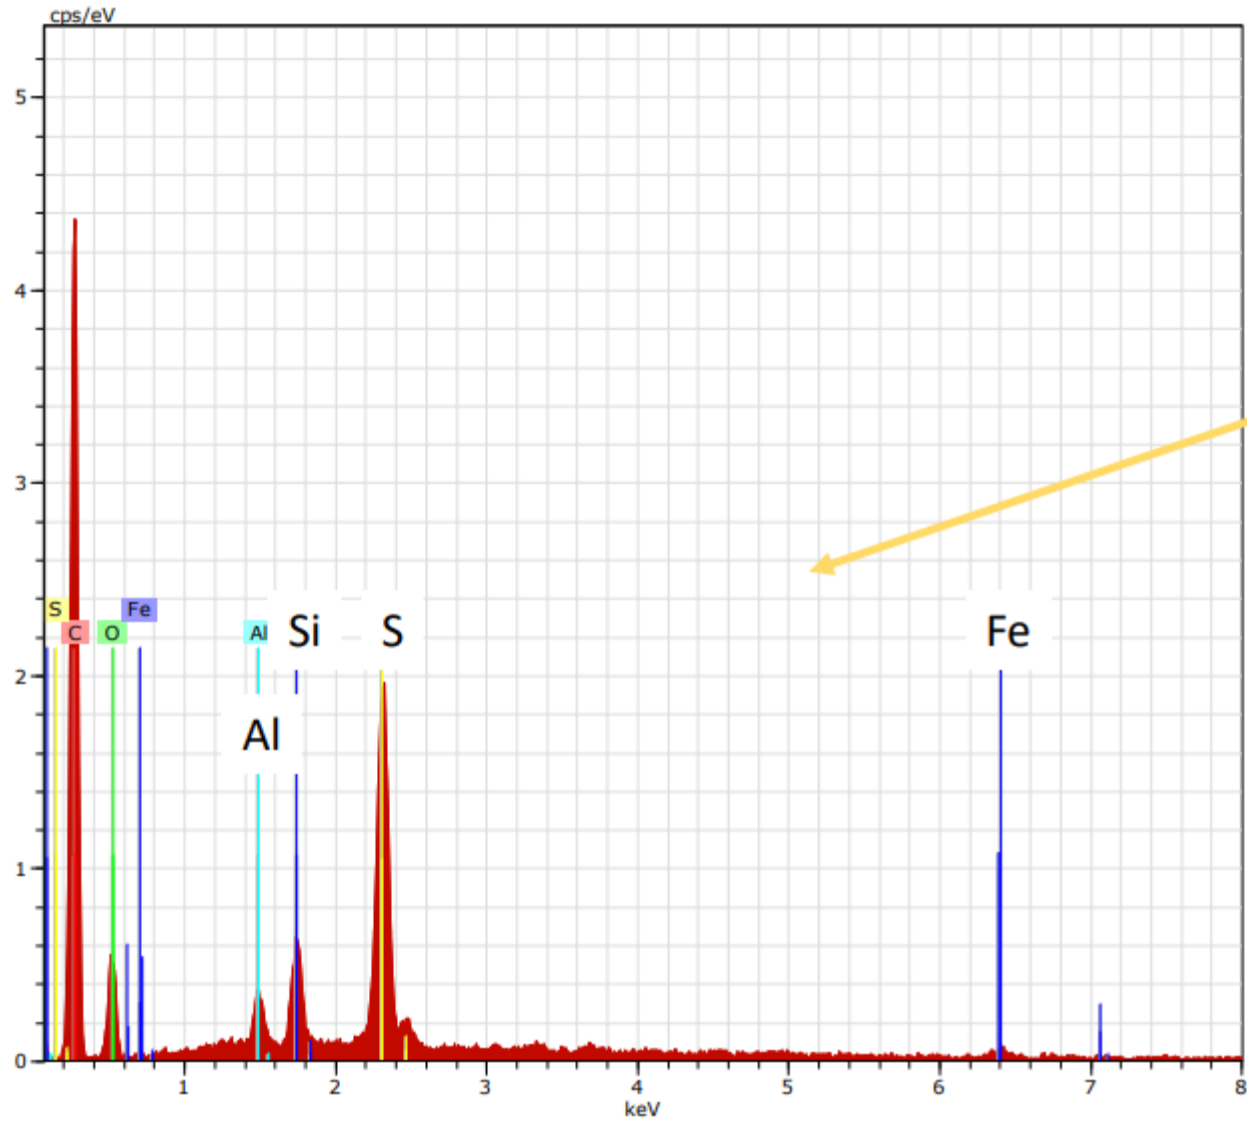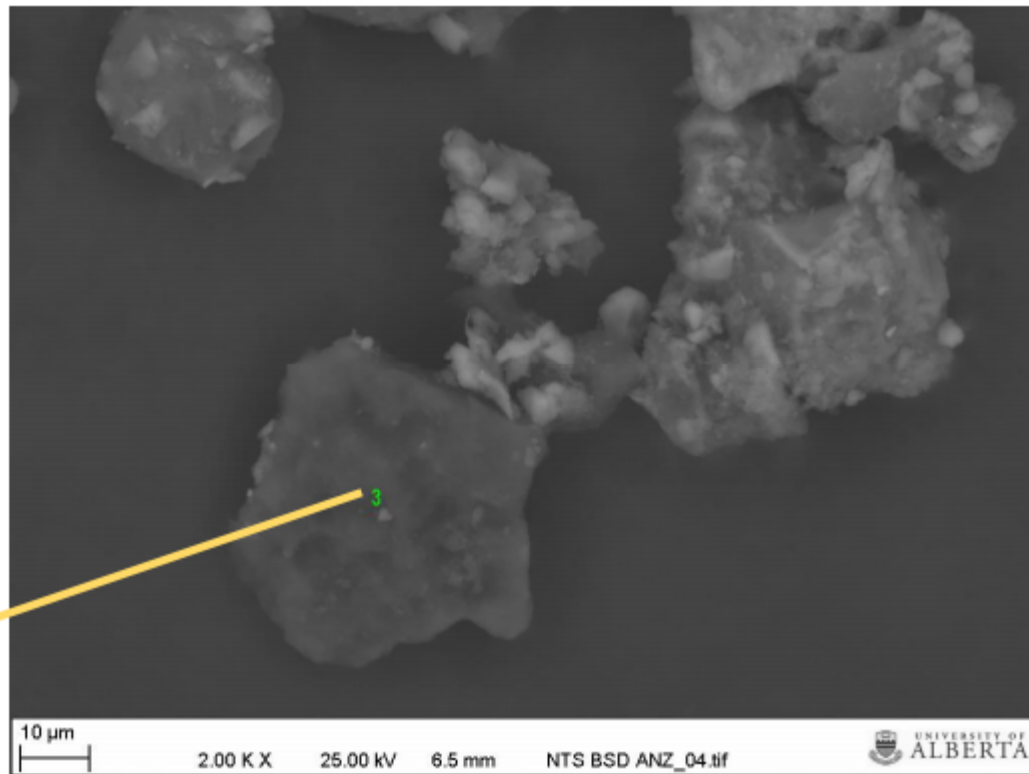

# JPH 4-1

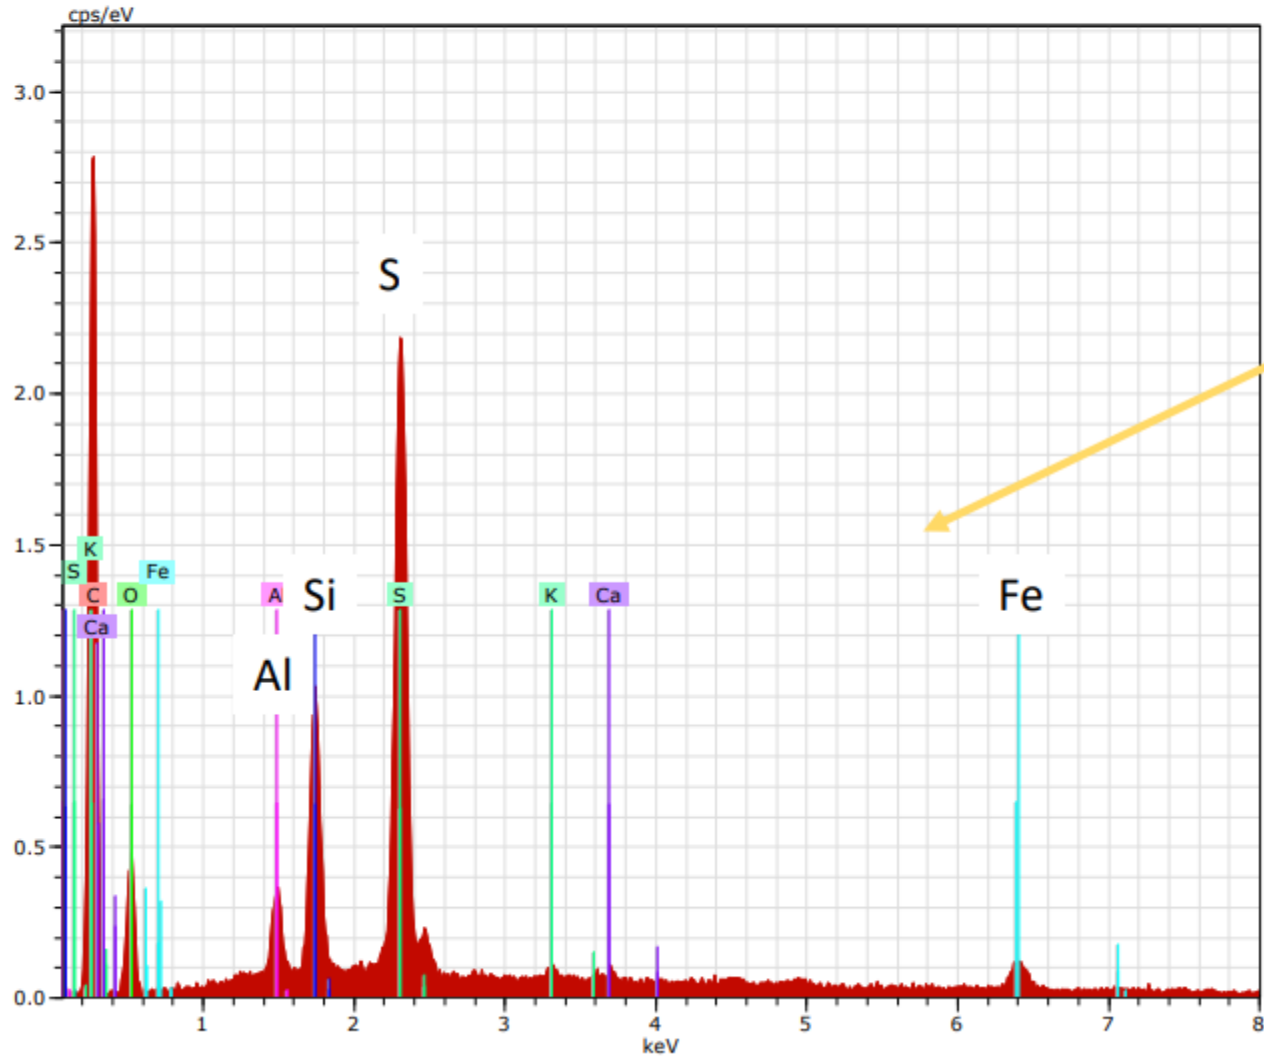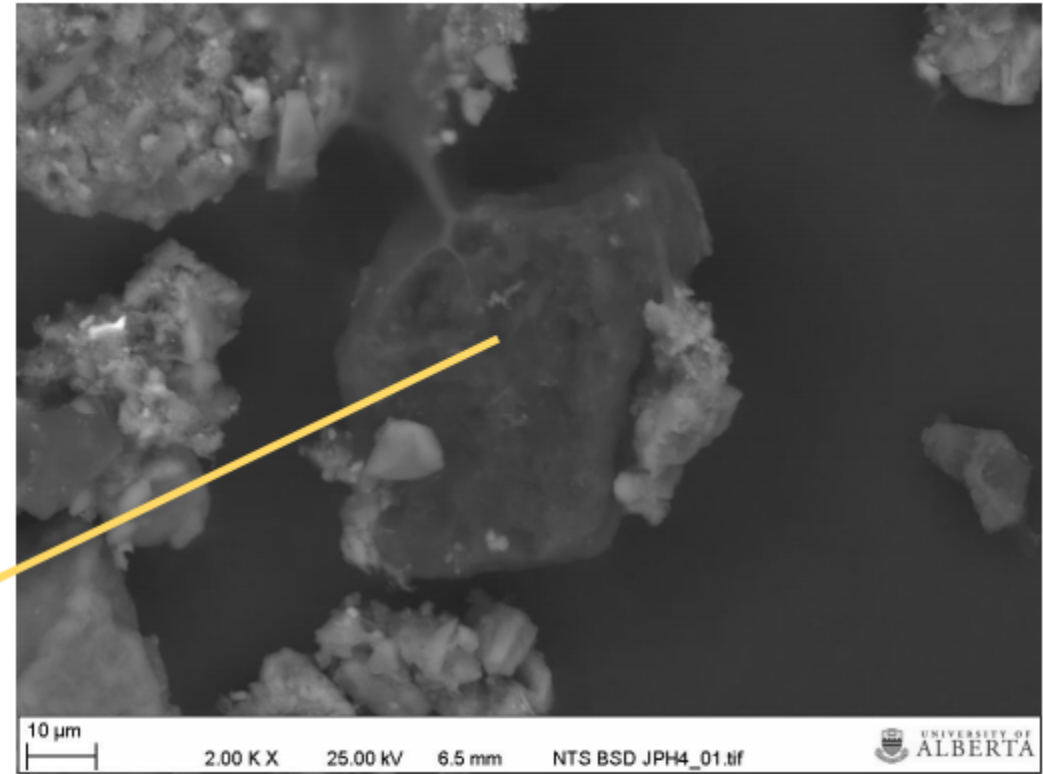

# JPH 4-2

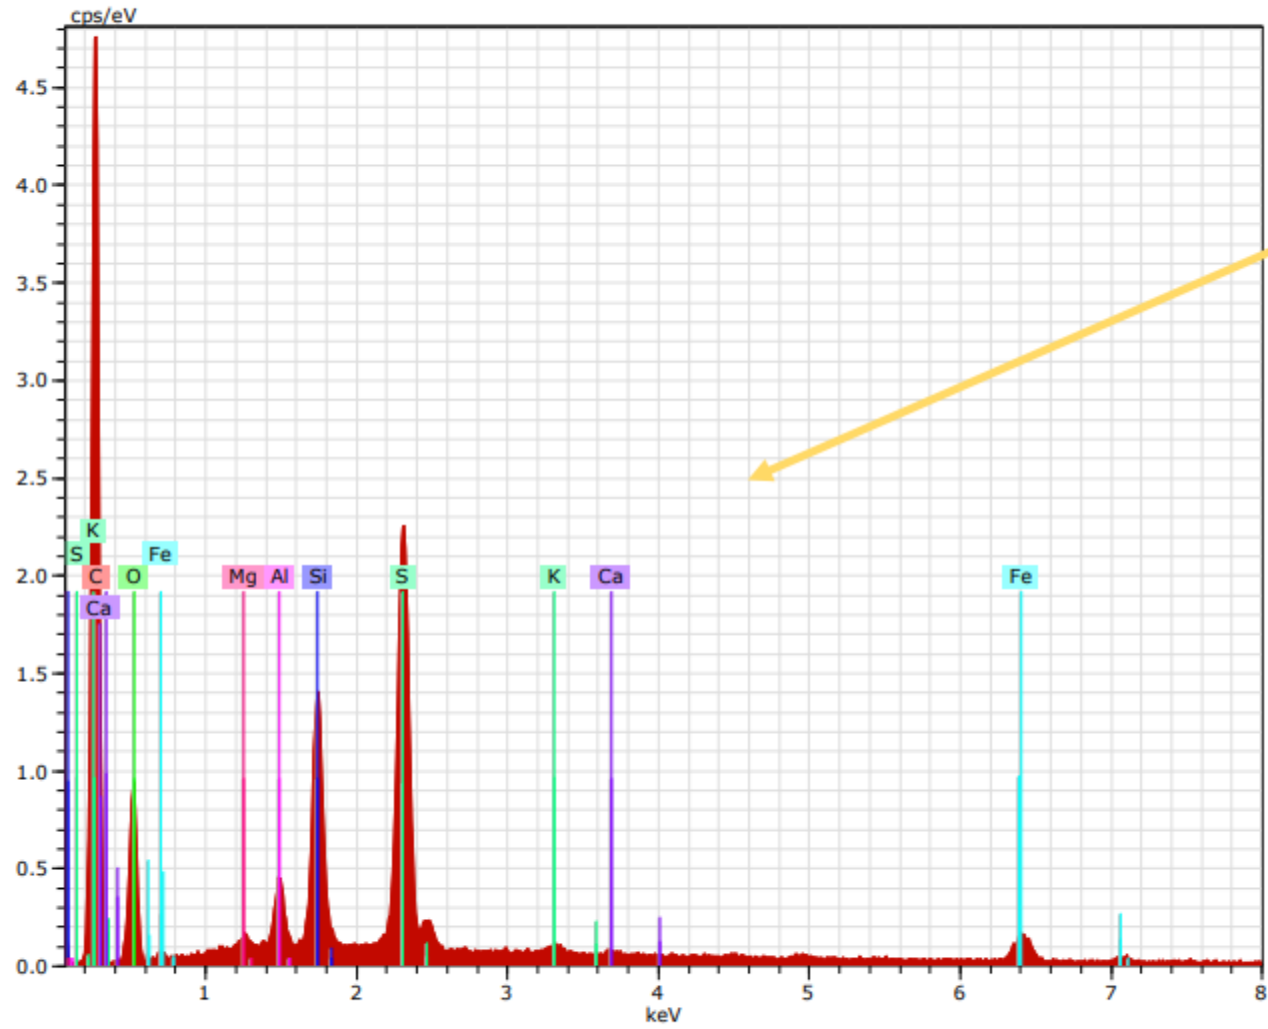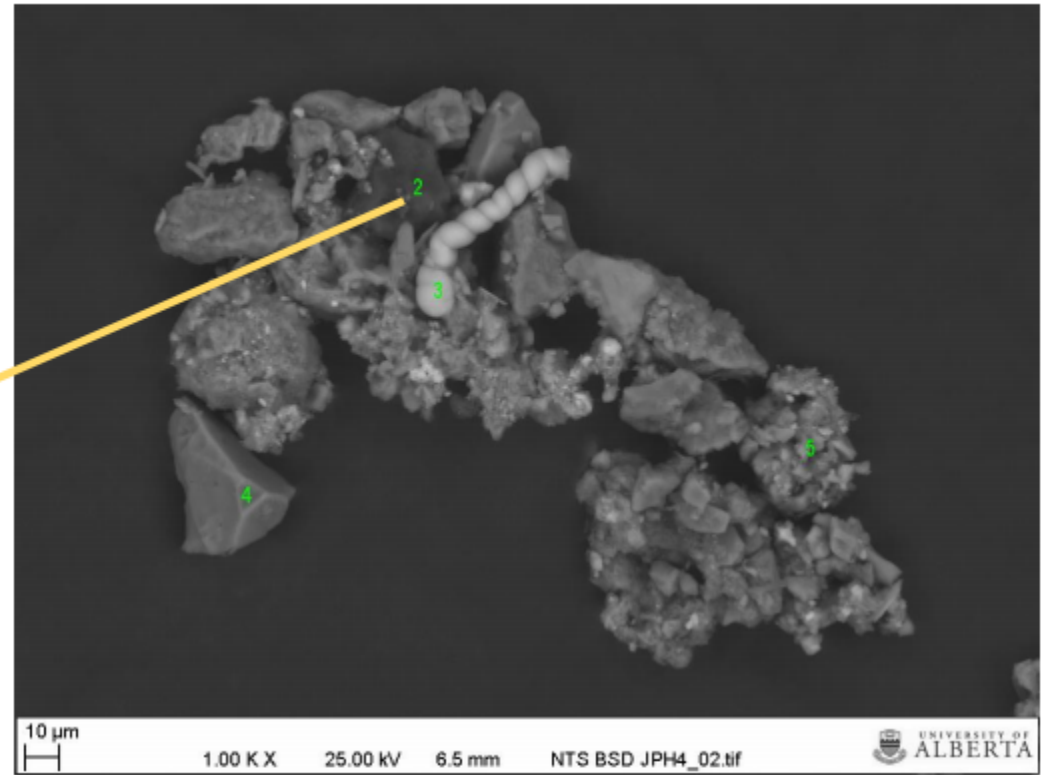

# JPH 4-3

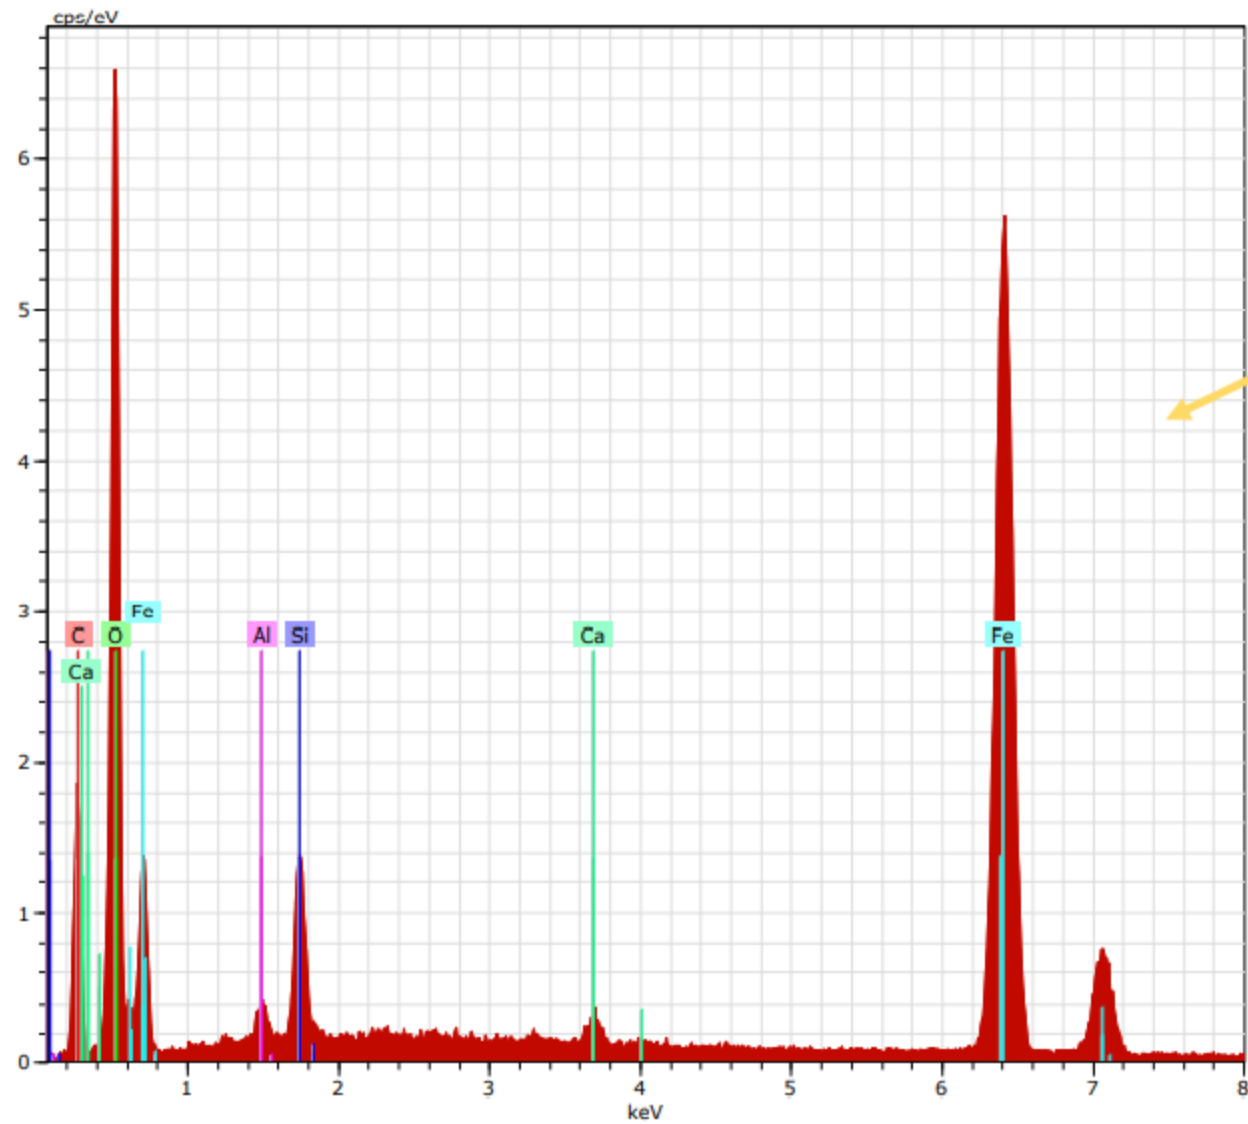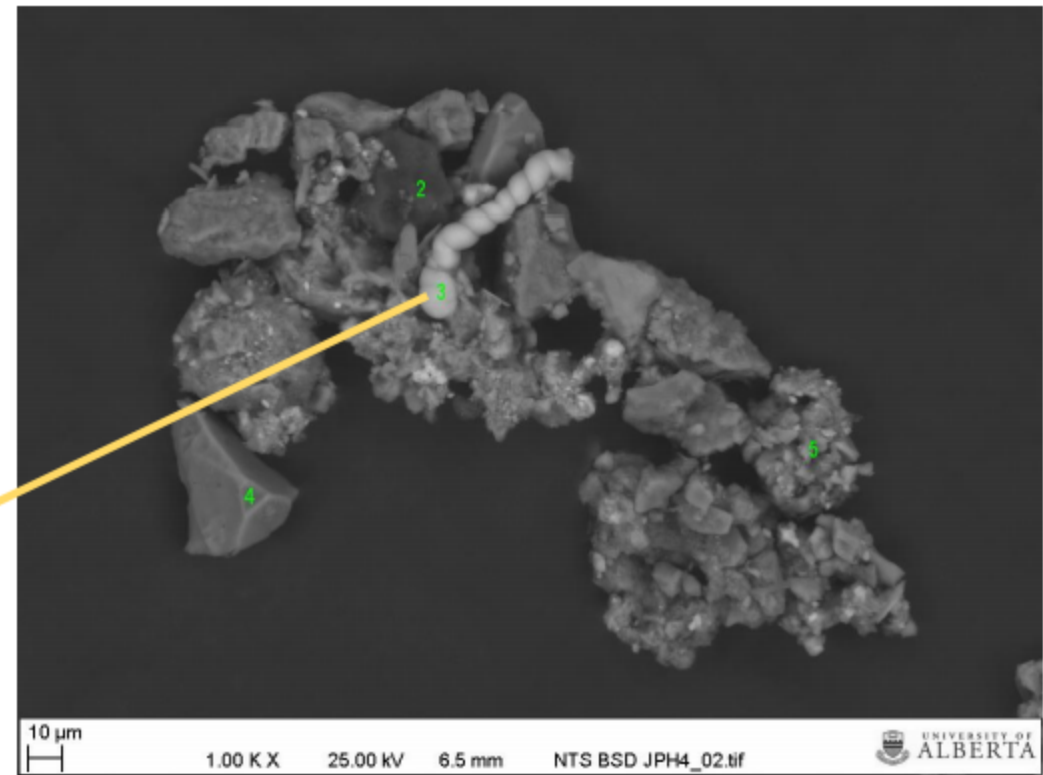



# JPH 4-4

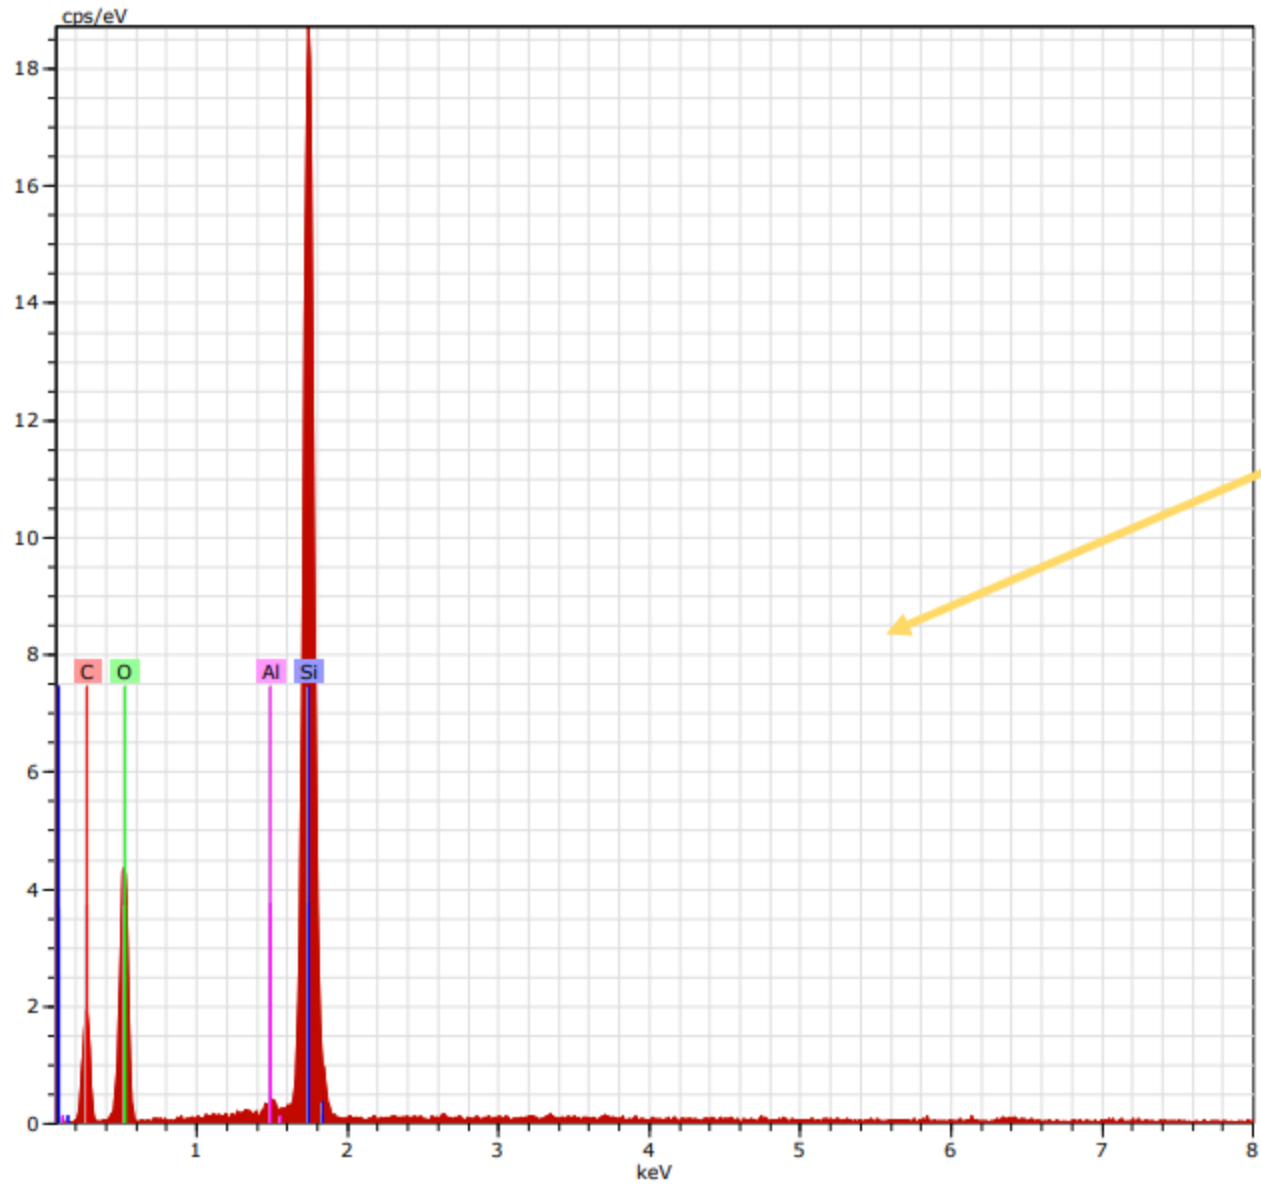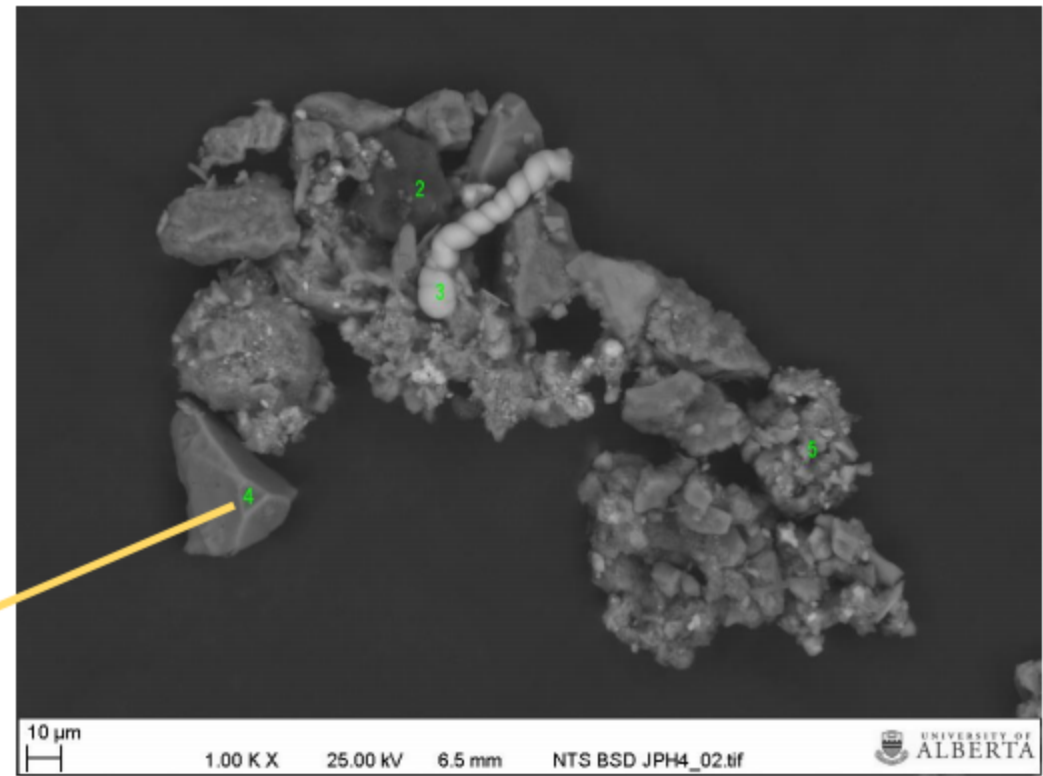

# JPH 4-5

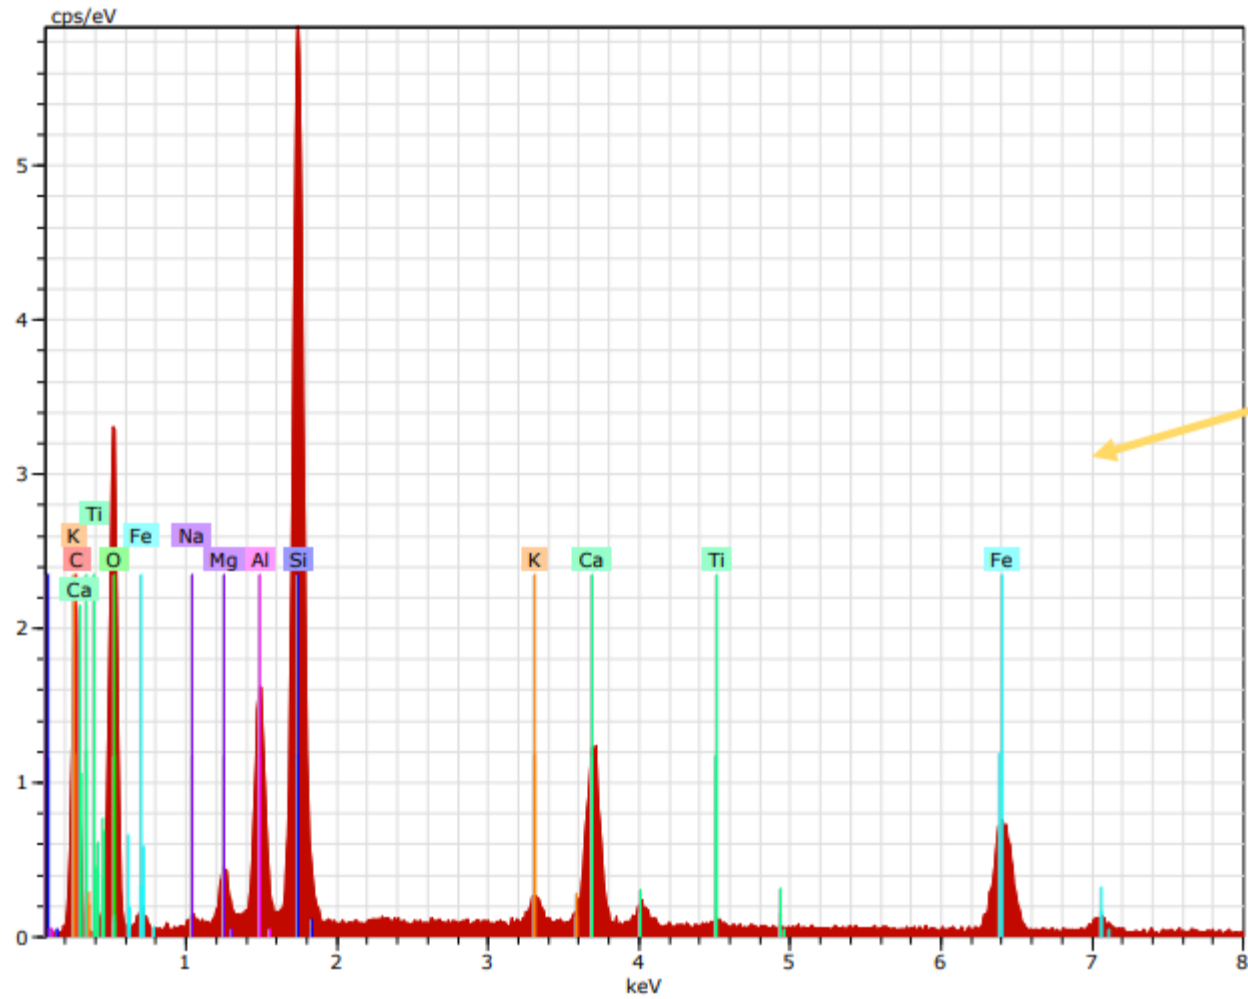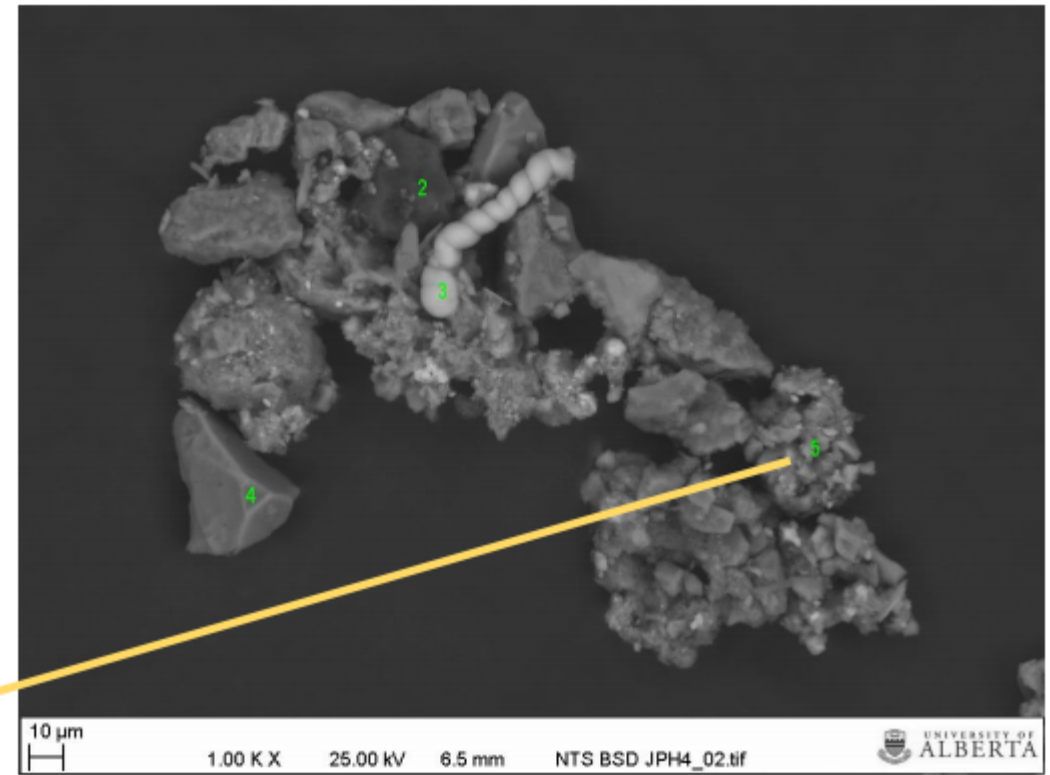

# JPH 4-6

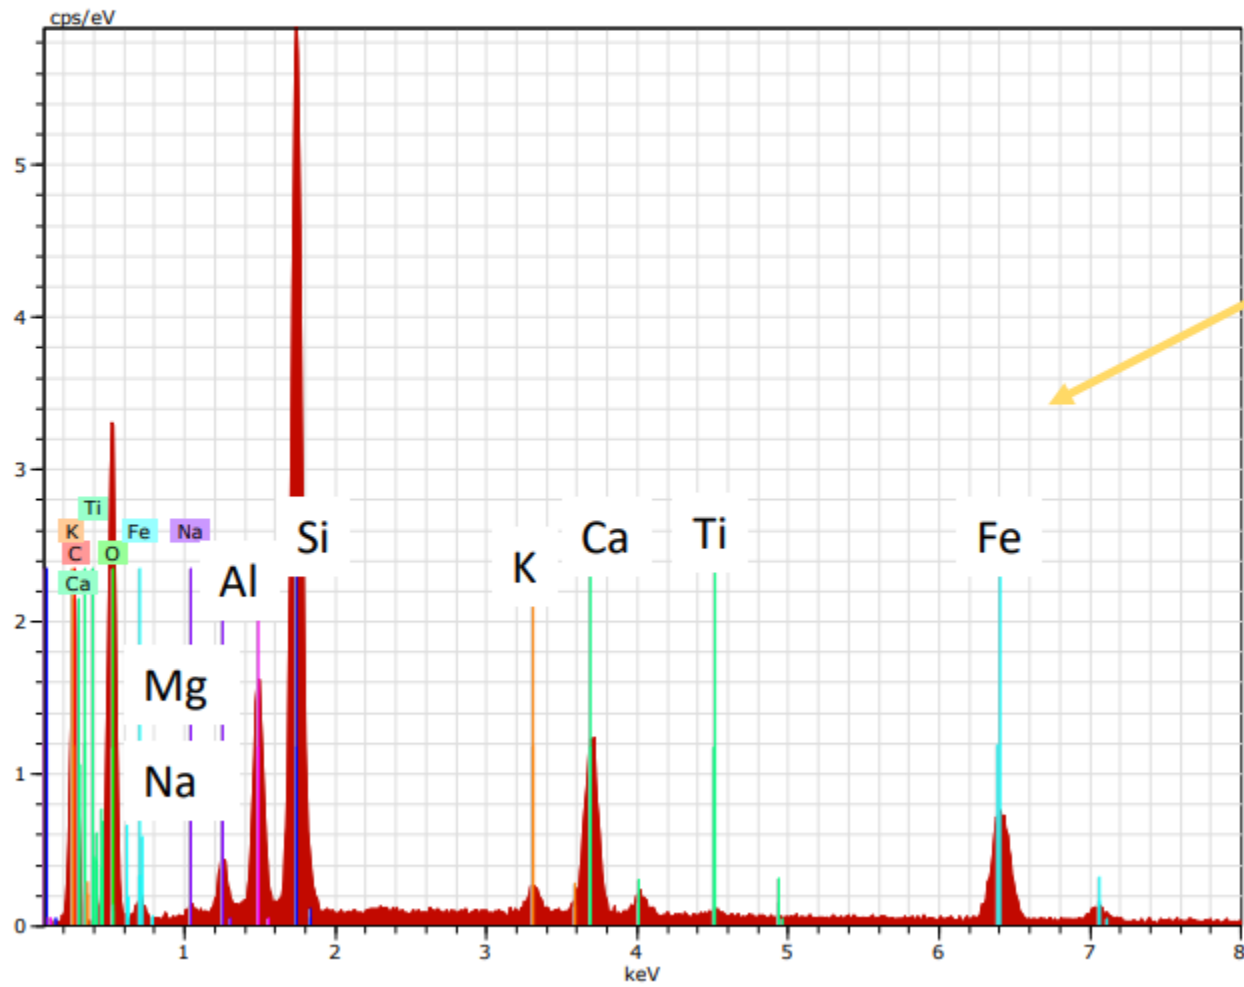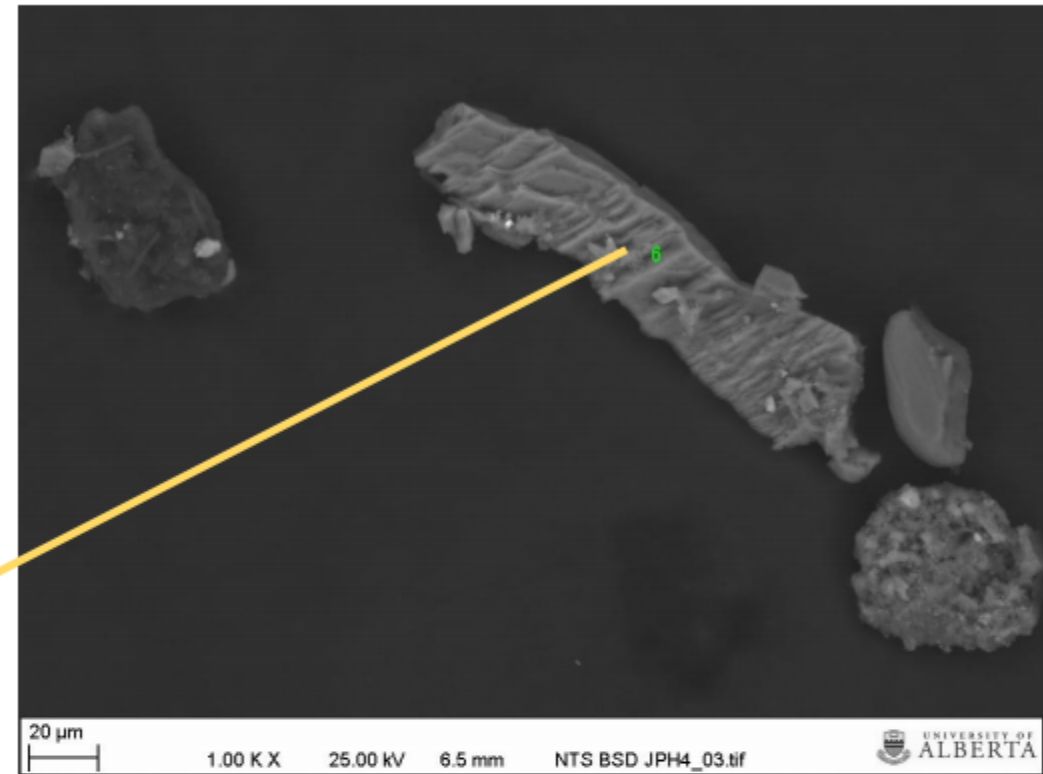

# McK-1

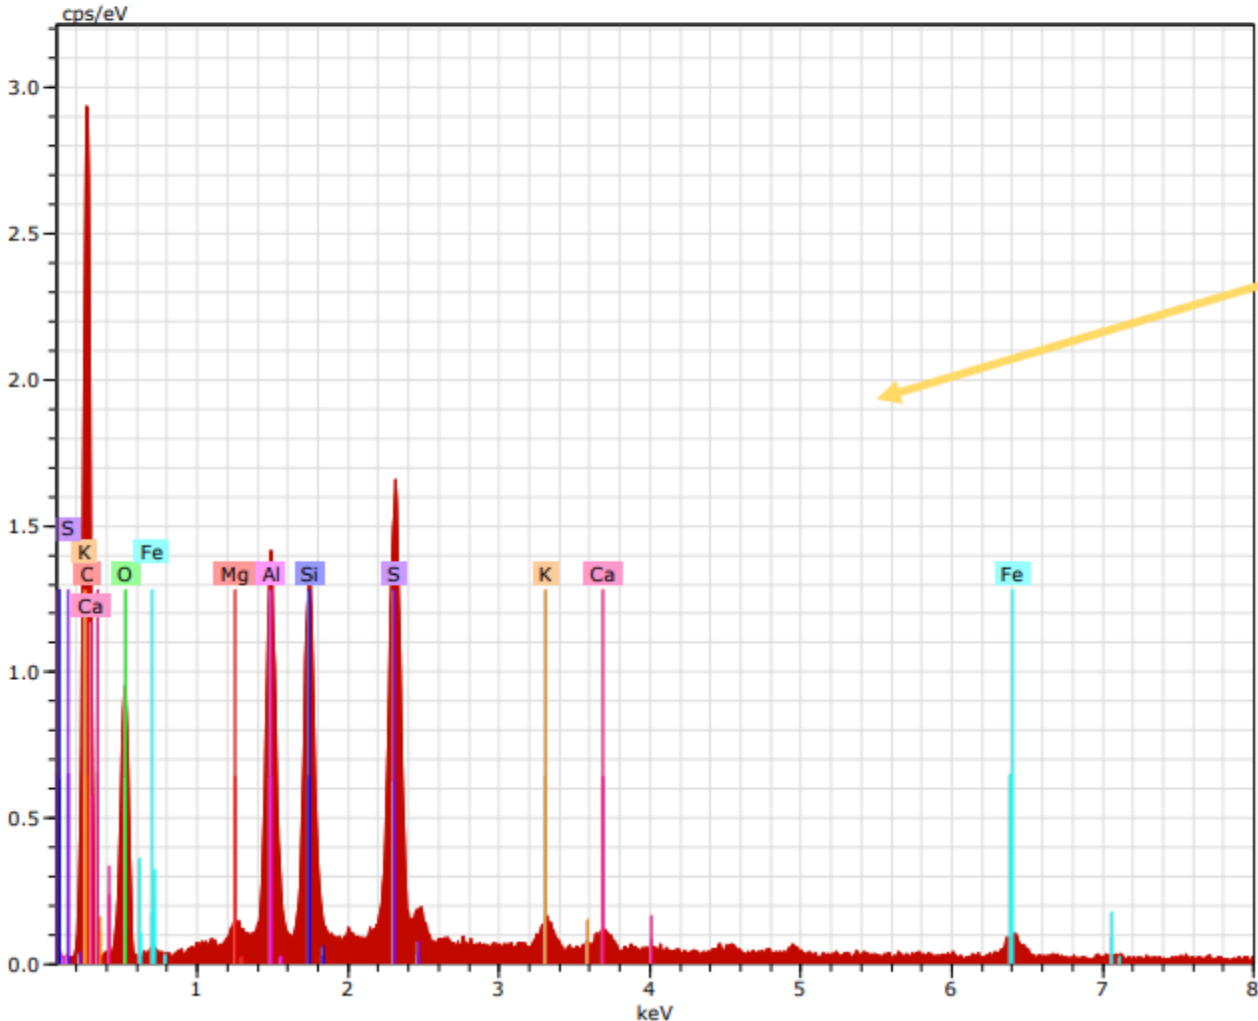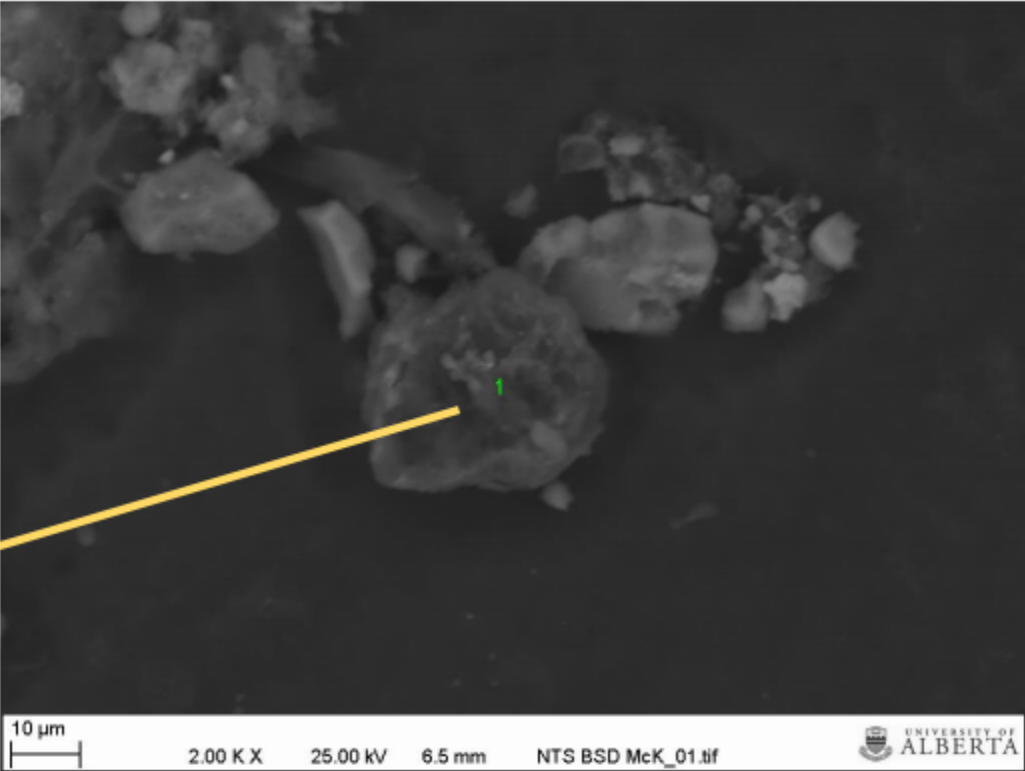

# McK-2

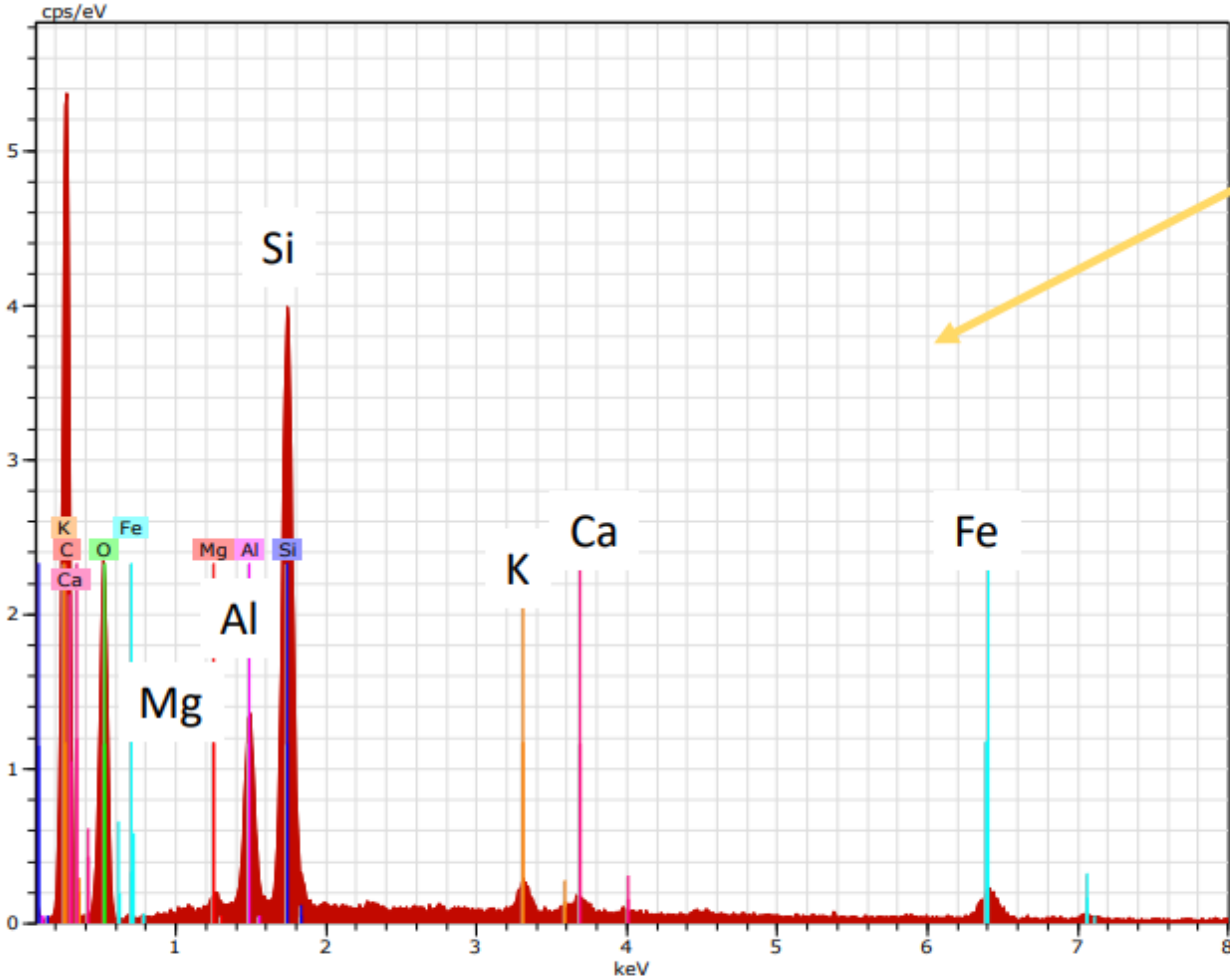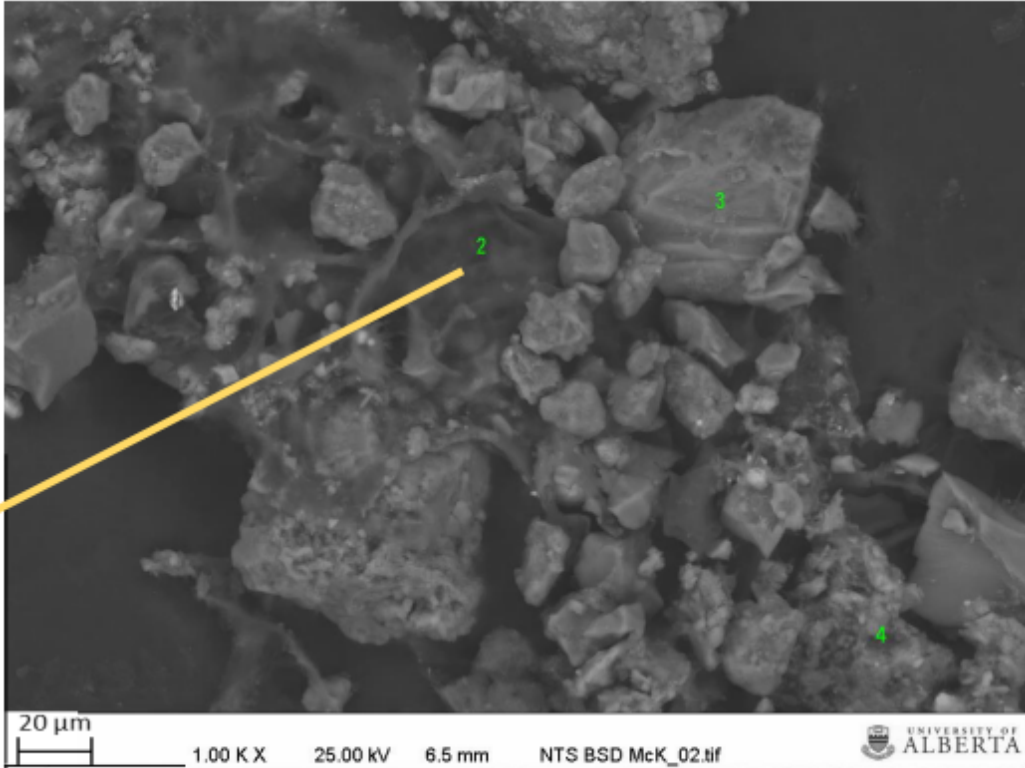

# McK-3

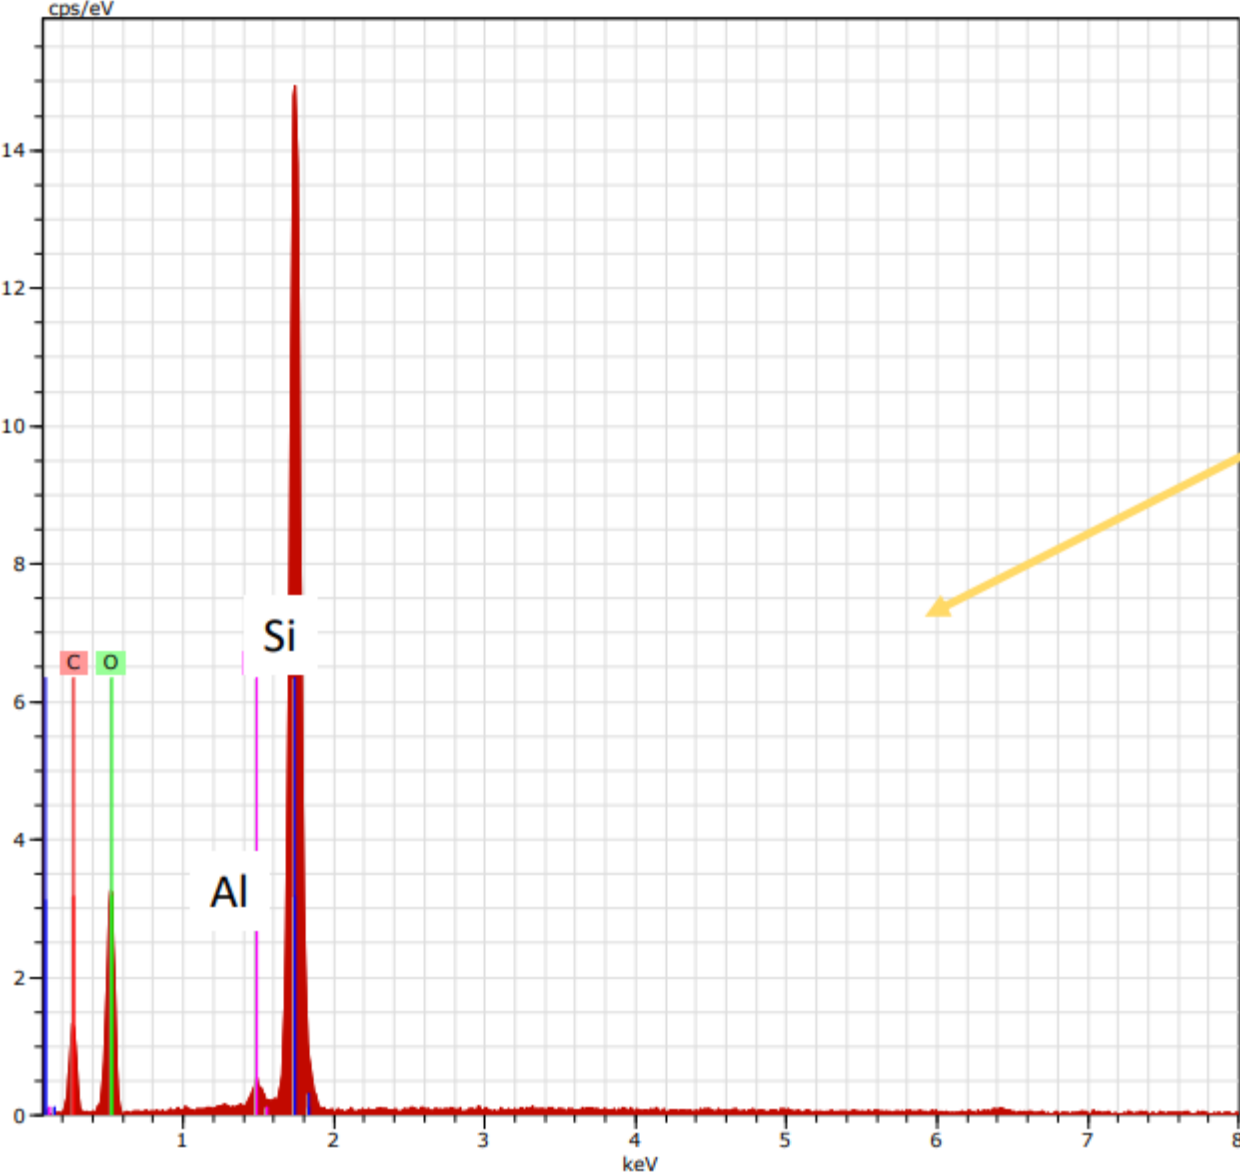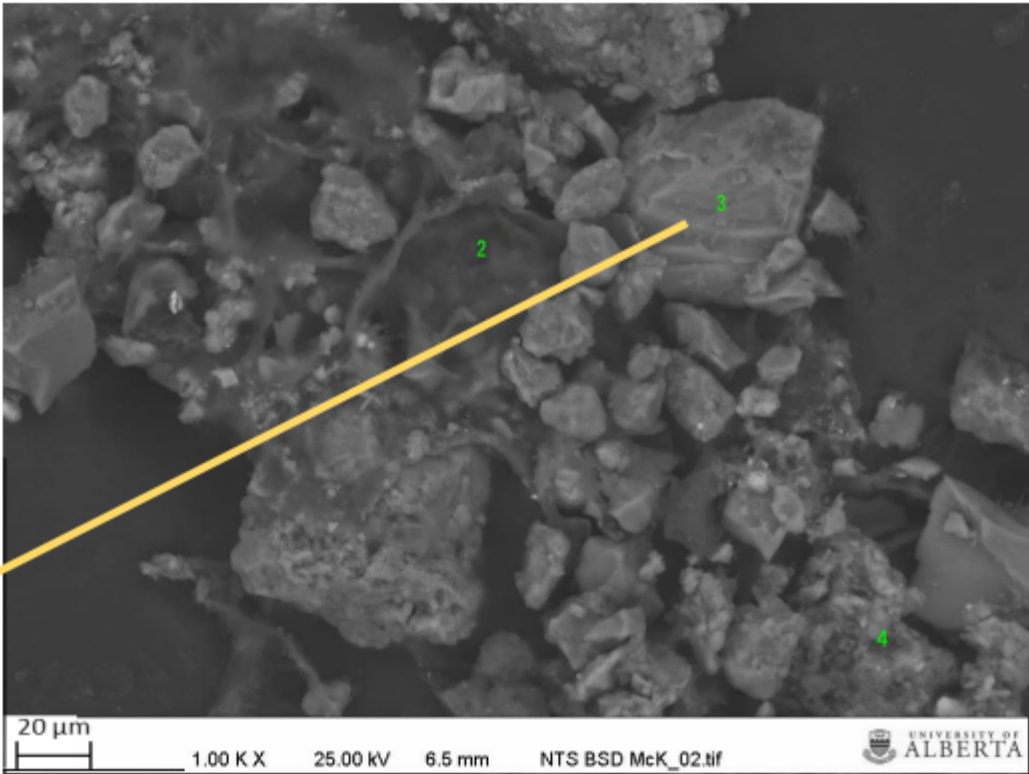

# McK-4

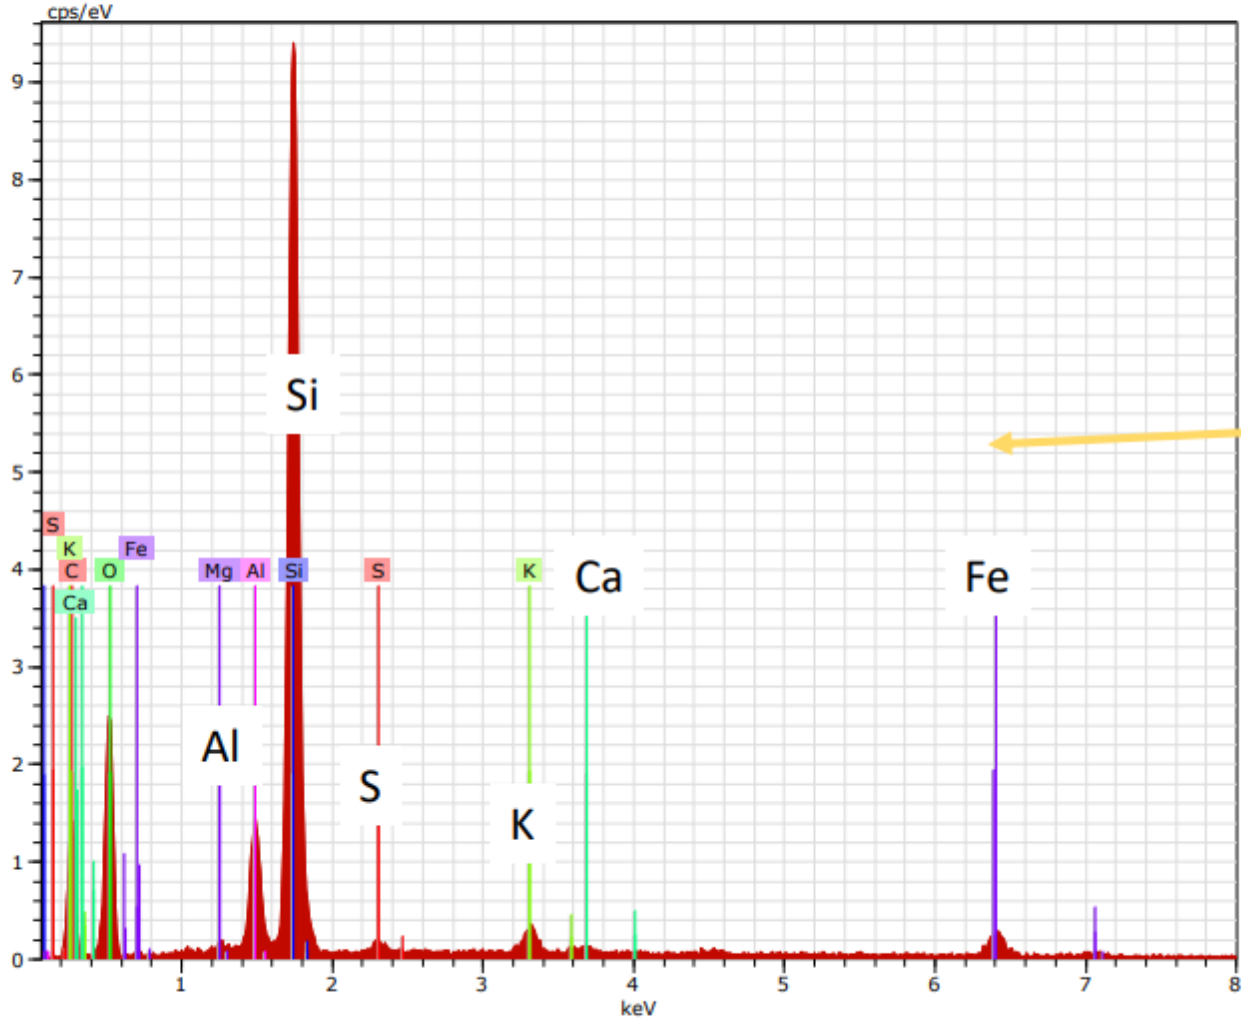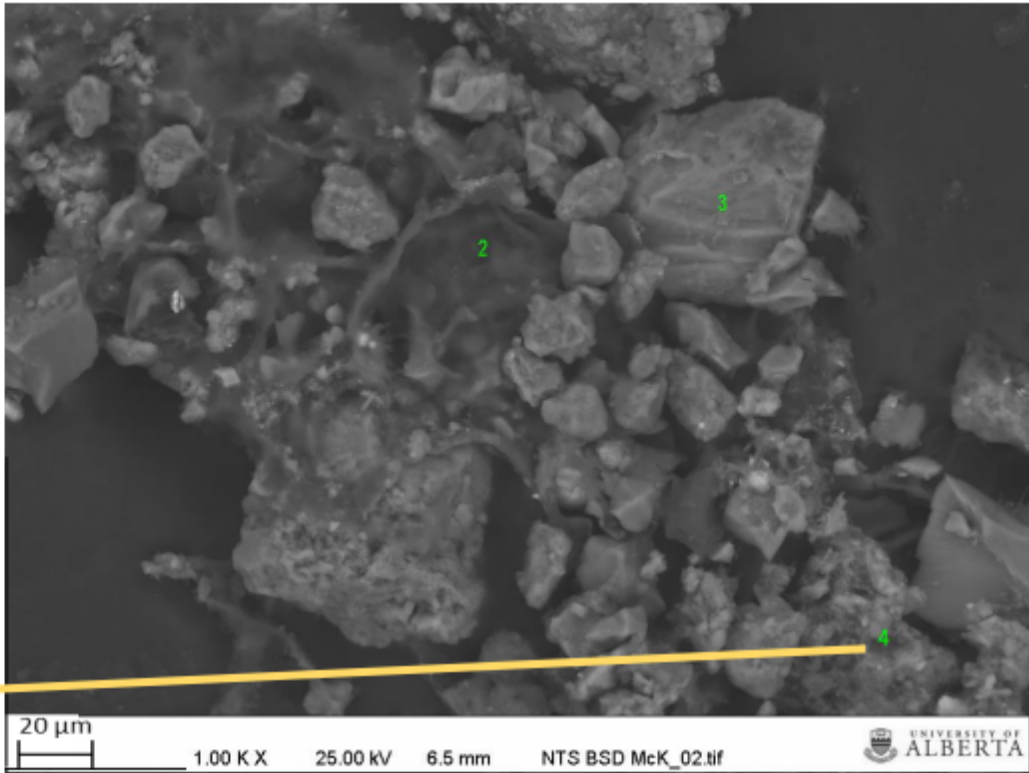

# McM-1

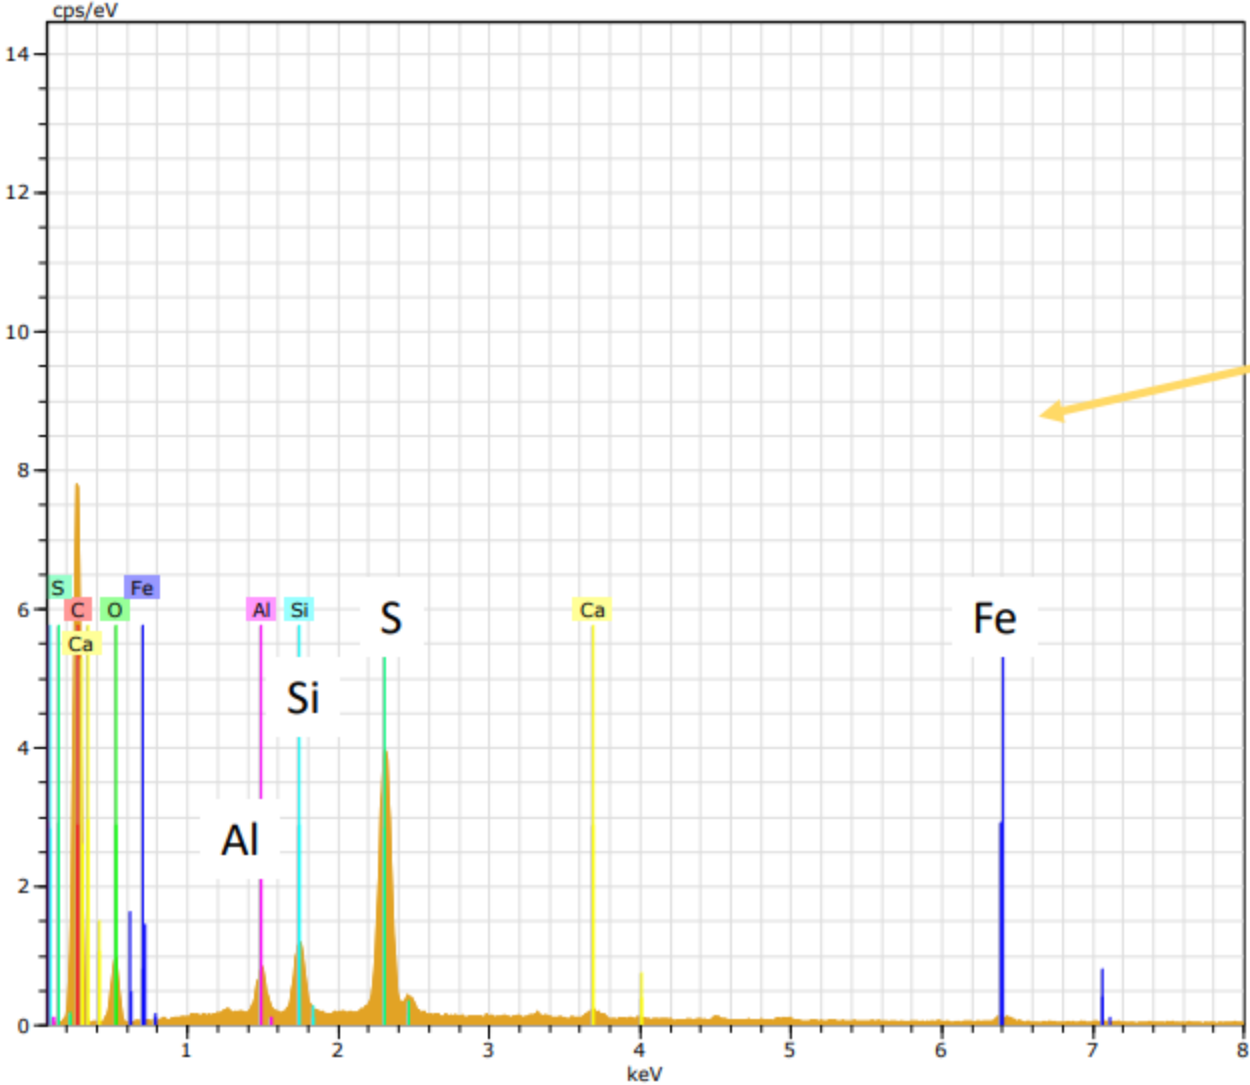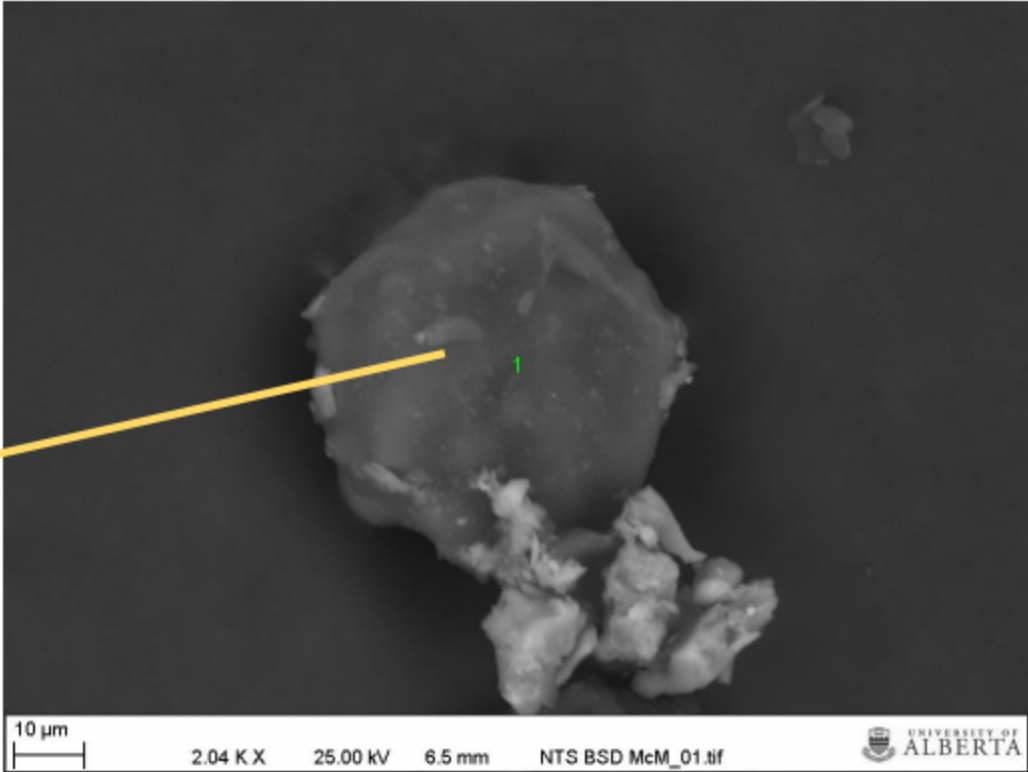



# McM-2

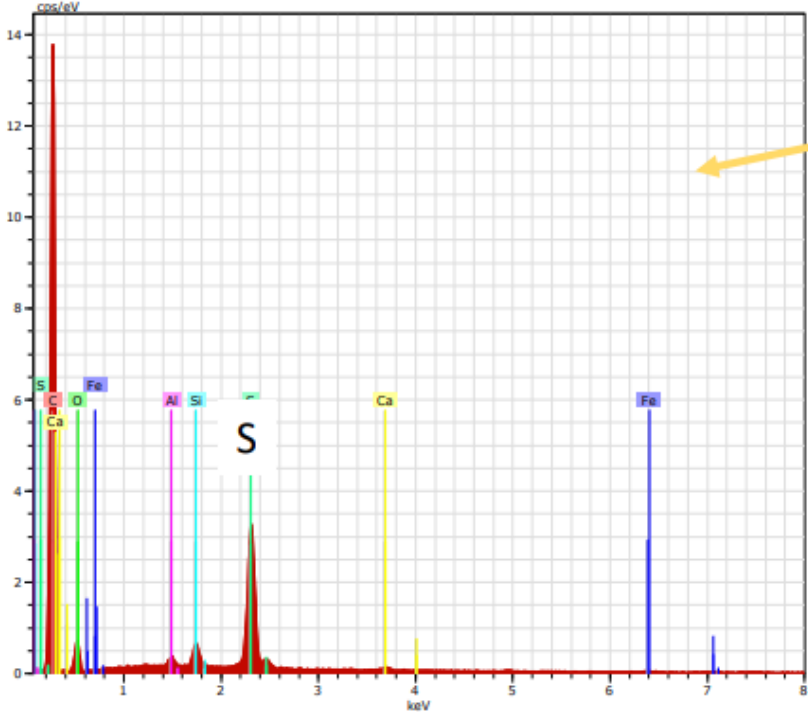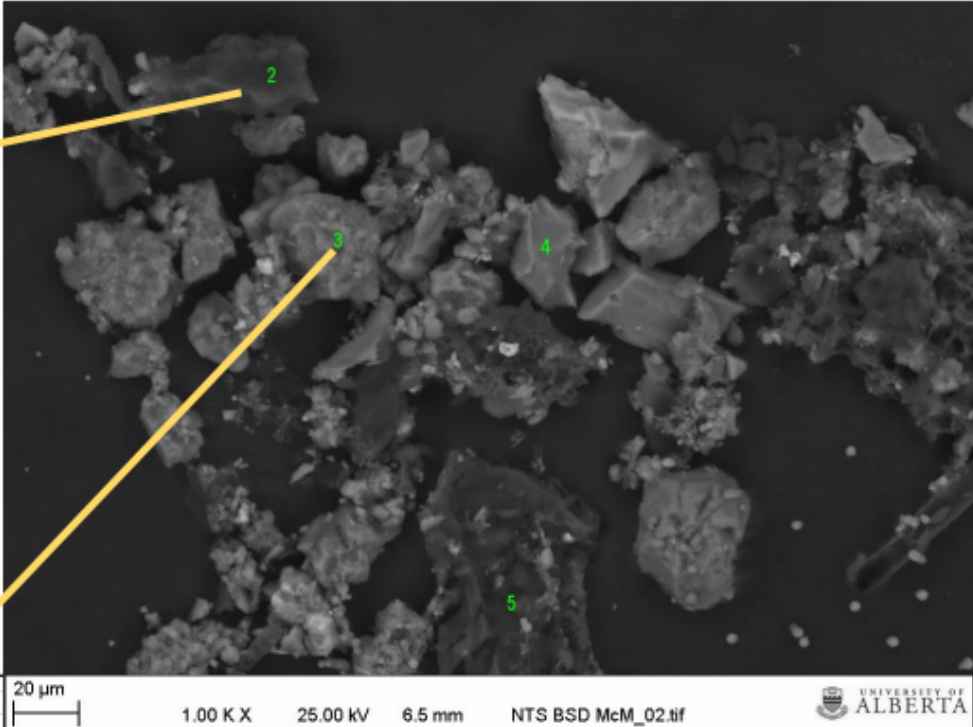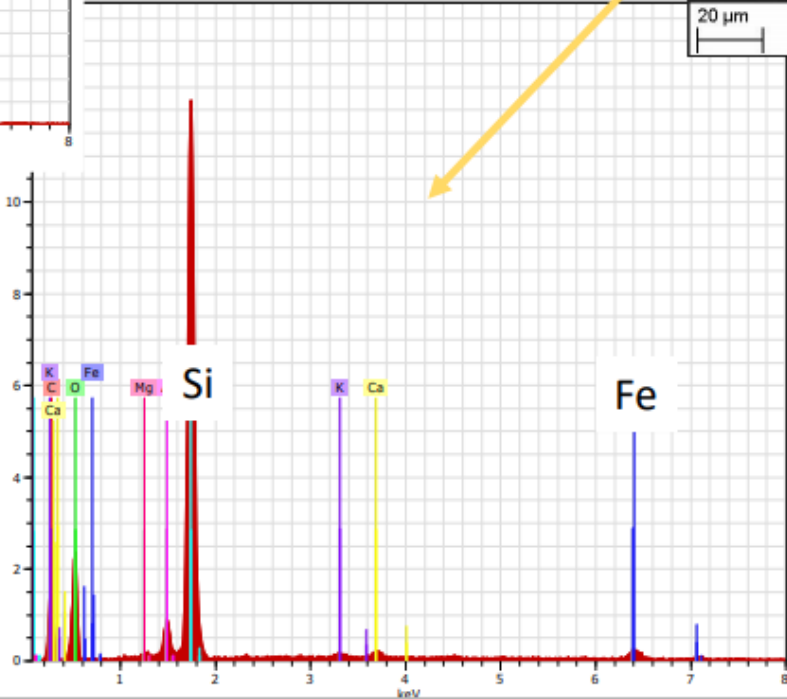

# McM-3

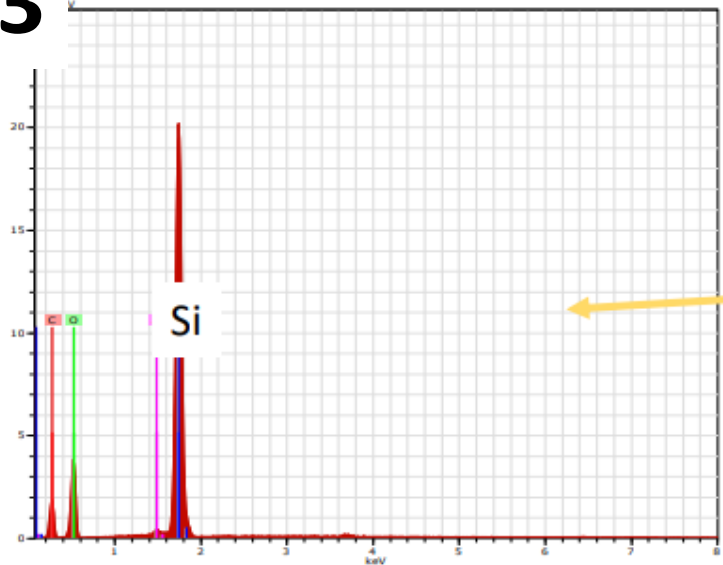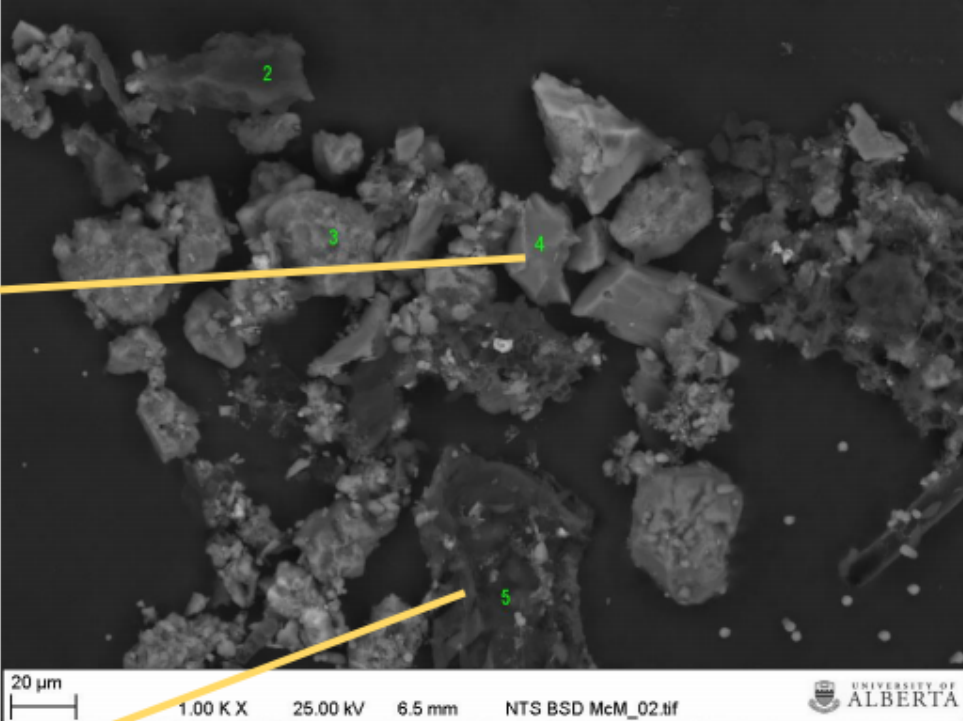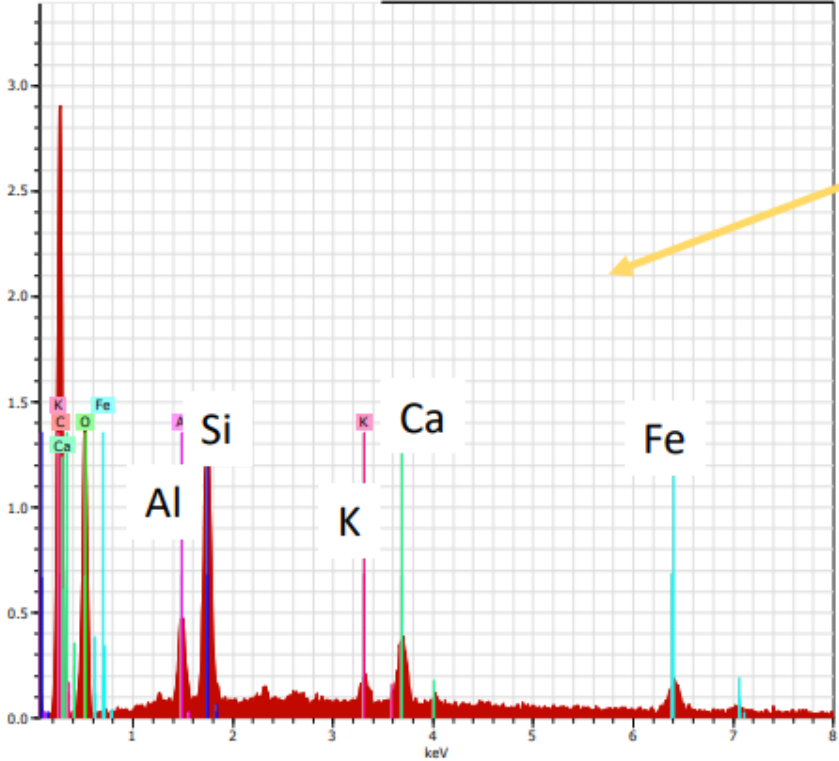

# MIL-1

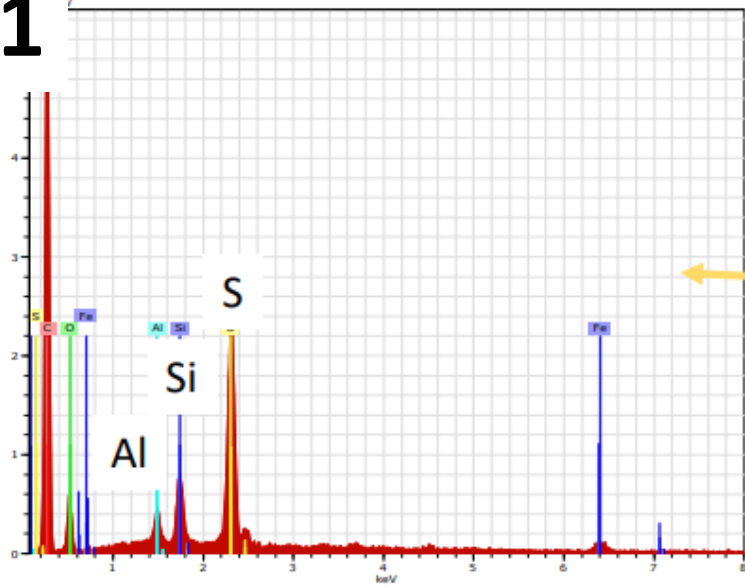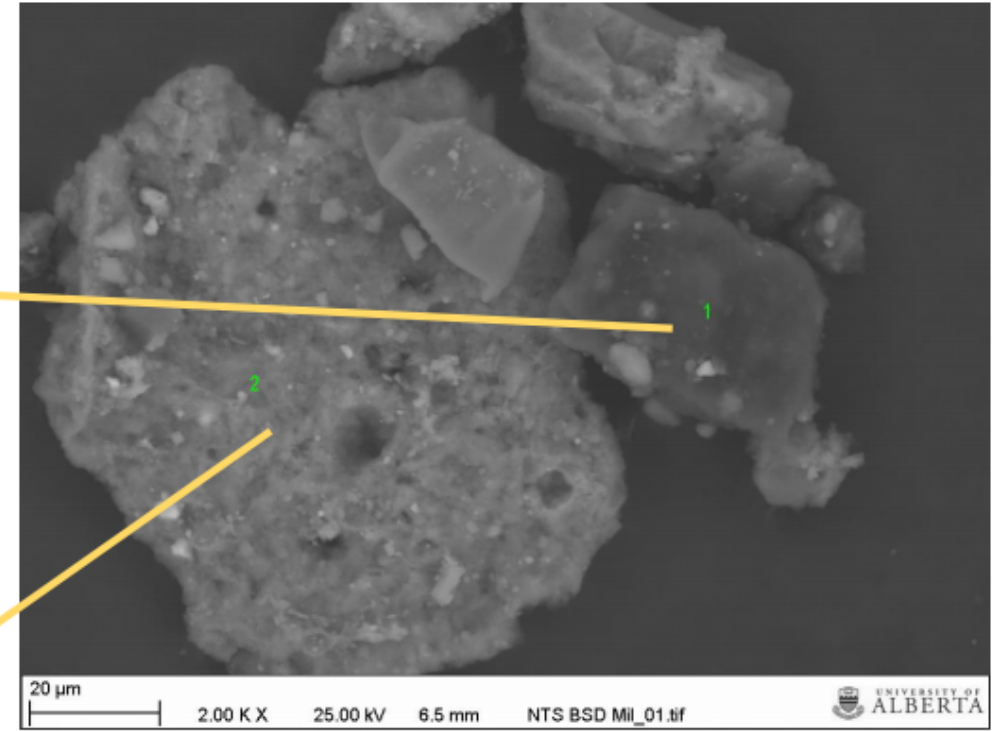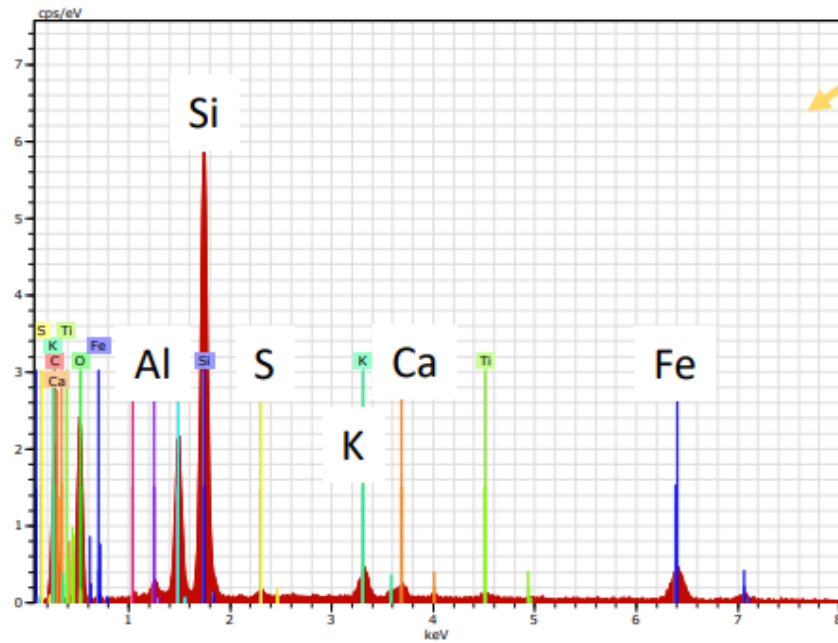

# MIL-2

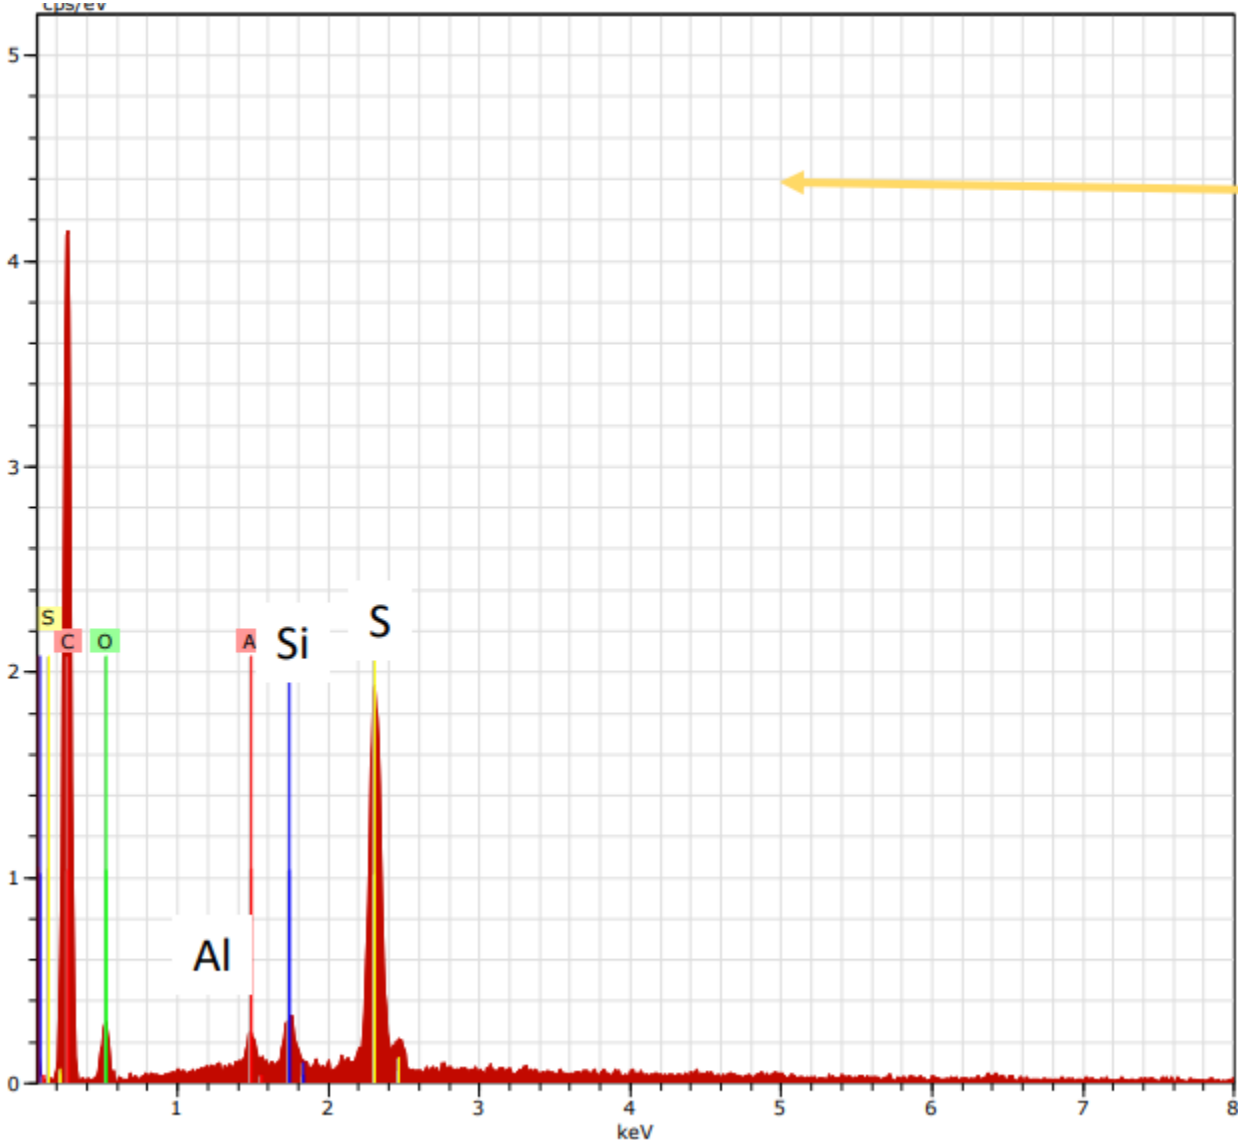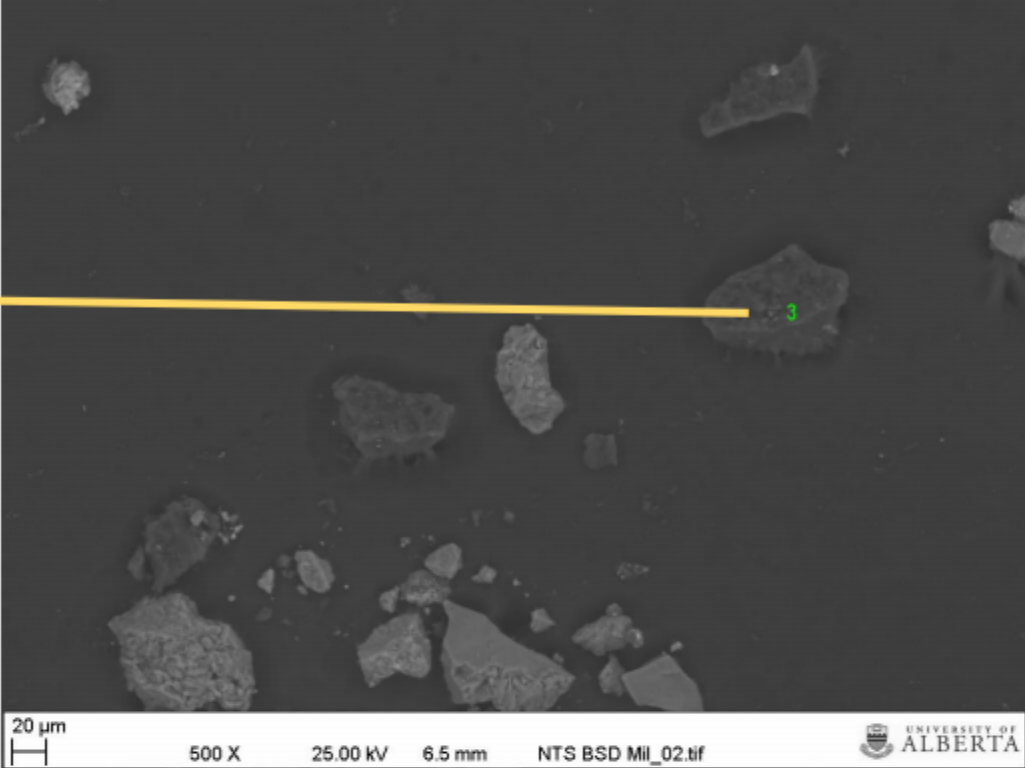

# MIL-3

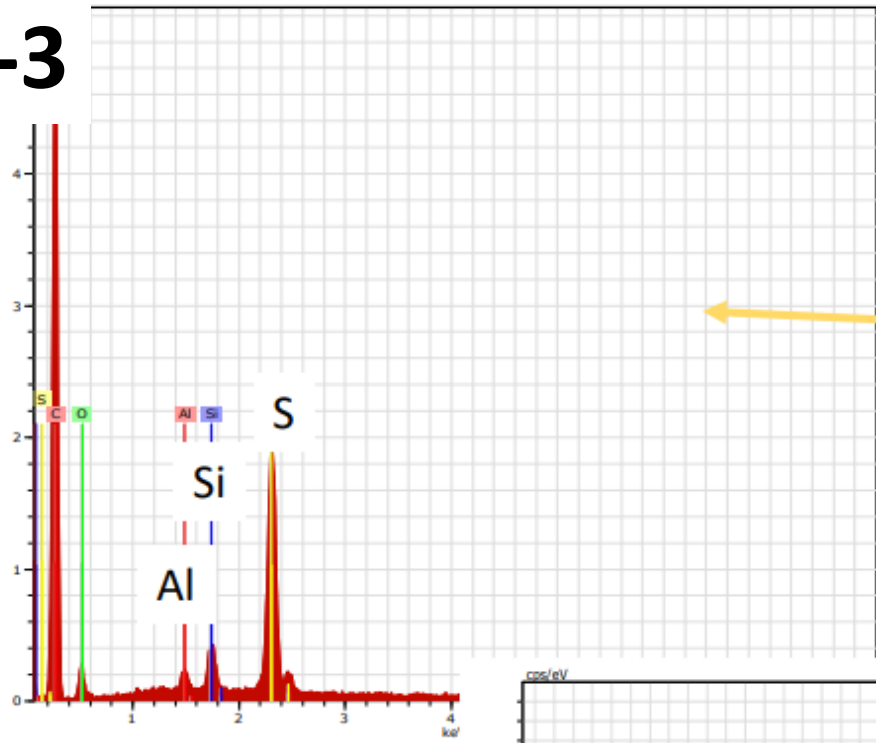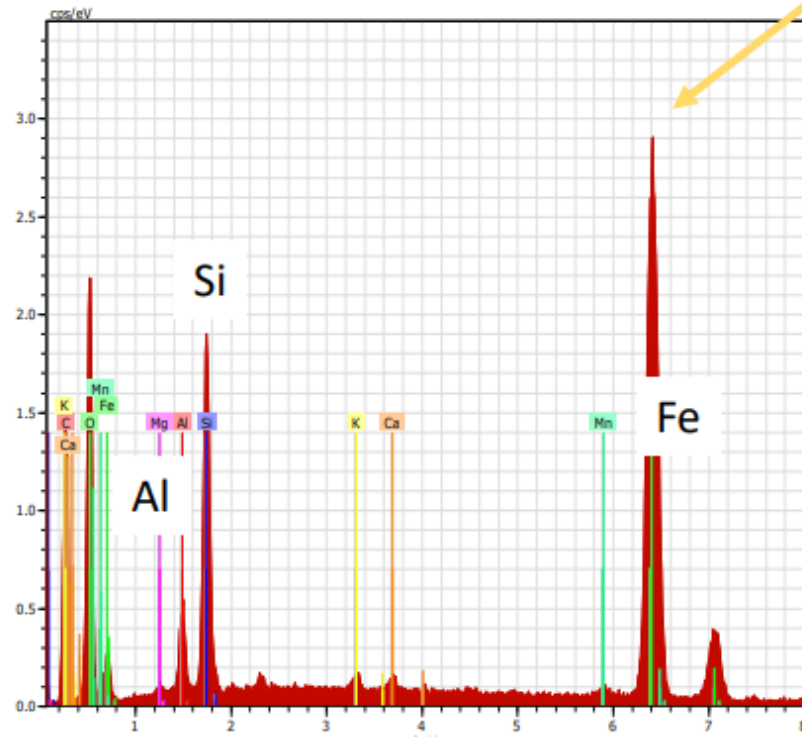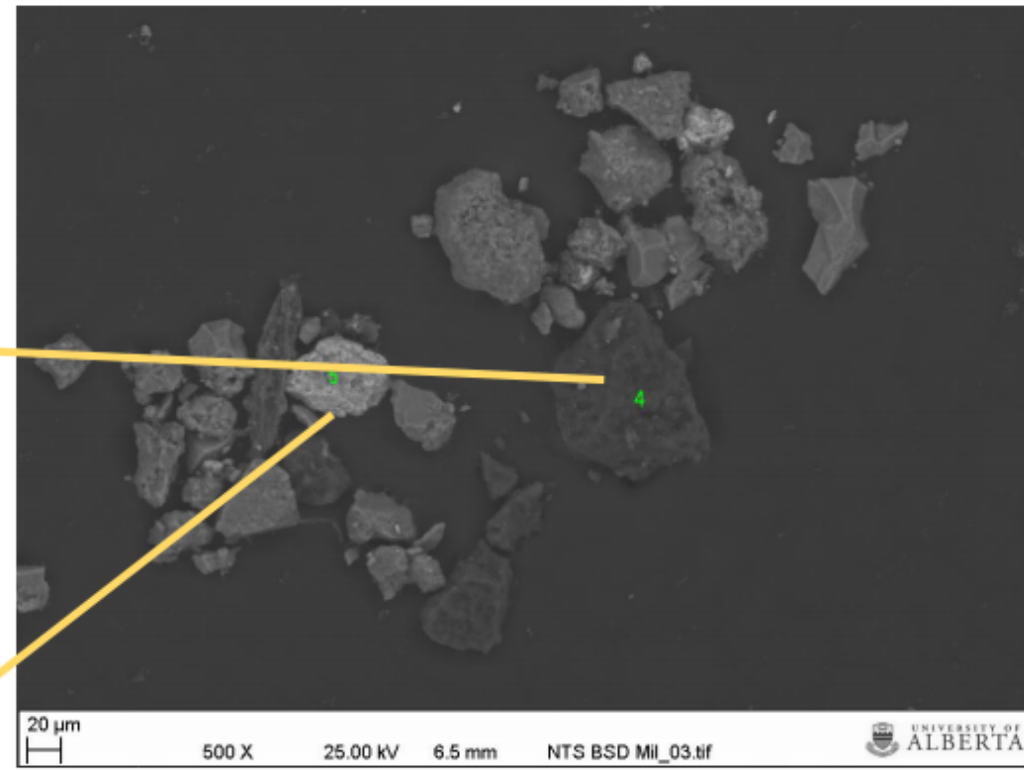

Supplement: d1ea00034a2.pdf [file d1ea00034a2.pdf]
