# Supplementary material for: Size-fractionation of trace elements in dusty snow from open pit bitumen mines and upgraders: collection, handling, preparation and analysis of samples from the Athabasca bituminous sands region of Alberta, Canada
Source: Royal Society of Chemistry journal article supplement (doi:10.1039/d1ea00034a), 2022-01-01
Supplement: d1ea00034a3.xlsx [file d1ea00034a3.xlsx]

## Sheet: Table S3.
	Table S3. Concentrations of trace elements in the acidified (A) and not acidified (NA) snow and Milli Q water (MQW) spiked with 10, 20 and 30 ng/L multielemental standards (CLMS-1 and CLMS-2AN) as well as Mo, Re, Sb, Te, Ti, W and Zr to determine sorption to PP bottle walls over time: immediately after spiking (T0), after one hour (1), after 1 day (24), after 1 week (168) and after one month (720…
					Ag					As					Ba					Be					Cd					Ce					Co					Cr					Cs
			LOD, ng/L		0.156375					0.664178					1.92305					0.0822249					0.185077					0.0549162					0.223788					1.22598					0.23938
			LOQ, ng/L		1.27244					3.17045					8.08554					0.404257					0.739341					0.231583					1.1826					11.0145					1.027
				Spiked concentration, ng/L	T0	T1hr	T24hrs	T1wk	T1m	T0	T1hr	T24hrs	T1wk	T1m	T0	T1hr	T24hrs	T1wk	T1m	T0	T1hr	T24hrs	T1wk	T1m	T0	T1hr	T24hrs	T1wk	T1m	T0	T1hr	T24hrs	T1wk	T1m	T0	T1hr	T24hrs	T1wk	T1m	T0	T1hr	T24hrs	T1wk	T1m	T0	T1hr	T24hrs	T1wk	T1m
					hours					hours					hours					hours					hours					hours					hours					hours					hours
					0	1	24	168	720	0	1	24	168	720	0	1	24	168	720	0	1	24	168	720	0	1	24	168	720	0	1	24	168	720	0	1	24	168	720	0	1	24	168	720	0	1	24	168	720
	MQW	Spiked with: CLMS-2AN + Mo + Re	Not acidified	10	4.39489	4.06363	4.33926	3.98834	4.03739	10.8526	10.7754	10.8064	10.9827	10.3662	10.1323	9.85947	9.10408	10.1389	10.7056	10.9009	10.436	10.4993	10.856	10.3988	10.1878	9.18905	9.68015	10.8042	10.6296	-	-	-	-	-	10.3351	9.91634	9.52158	10.5143	9.7049	10.6691	10.7506	9.62355	9.79864	9.27301	10.0689	10.2594	9.82865	10.2089	9.34922
				20	6.08595	6.79354	6.53289	6.73118	6.82615	20.4846	20.803	19.6971	20.6699	20.9837	20.4494	20.2833	20.8628	19.8711	19.9866	21.1118	21.0787	20.9744	21.4687	20.5147	20.5618	20.4281	20.4315	20.8554	20.5517	-	-	-	-	-	19.6232	20.2812	19.7875	21.0661	19.9459	21.128	21.2964	20.0993	19.471	18.7699	20.4746	20.3411	19.9358	20.4526	20.1566
				30	8.75538	9.6906	8.91221	8.93519	7.79348	31.637	30.5815	29.7761	30.8017	30.8449	30.2934	30.2119	29.4174	30.1815	30.647	31.279	32.64	31.1749	31.9357	30.2448	30.7166	30.0547	30.6083	30.977	30.8621	-	-	-	-	-	30.0336	29.3521	28.8375	31.7293	28.904	30.7088	31.2203	30.3938	31.9882	29.2718	30.006	30.1097	30.0617	30.9021	29.0739
			Acidified	10	10.4233	10.6564	10.3657	10.5959	9.36788	10.4456	10.707	10.3849	10.1406	10.5075	9.59306	10.6795	10.5792	10.0939	10.7359	10.3931	10.1004	10.7202	10.2015	10.1874	10.5747	10.2312	10.1325	10.2721	10.8153	-	-	-	-	-	10.2031	10.0542	9.91746	9.42459	9.11434	10.6203	10.1151	10.8952	10.8569	10.7156	10.1811	10.0502	10.1591	10.6787	9.2728
				20	20.4198	20.05	20.6401	20.6567	19.7126	20.9582	21.293	20.1968	21.6603	21.8542	20.7972	19.7835	21.2708	19.0337	18.0388	20.594	20.8376	21.3662	21.3897	20.9828	20.3104	20.6807	20.2542	20.5003	20.6231	-	-	-	-	-	19.9599	19.4986	19.6292	19.6168	19.3029	20.5505	20.2152	20.1893	20.5922	18.752	20.5241	20.5219	19.8666	19.6161	20.1331
				30	30.326	29.0781	29.8457	29.9418	29.618	30.5965	30.1563	30.4952	31.4493	30.393	30.3945	30.8722	30.1021	30.0663	30.0949	32.8012	32.2902	31.6064	31.7593	31.6931	30.8849	30.0229	30.4305	30.3405	30.8979	-	-	-	-	-	30.0785	29.0817	29.6281	29.1538	29.621	29.7022	30.0502	30.0298	30.1424	27.9693	30.3324	30.4064	29.7382	29.8832	29.6439
		Spiked with: CLMS-1 + Sb + Te + Ti + W + Zr	Not acidified	10	-	-	-	-	-	-	-	-	-	-	-	-	-	-	-	-	-	-	-	-	-	-	-	-	-	10.1283	10.8149	10.1253	10.1457	10.0312	-	-	-	-	-	-	-	-	-	-	-	-	-	-	-
				20	-	-	-	-	-	-	-	-		-	-	-	-	-	-	-	-	-	-	-	-	-	-	-	-	20.2189	20.3916	20.1767	20.1542	20.0298	-	-	-	-	-	-	-	-	-	-	-	-	-	-	-
				30	-	-	-	-	-	-	-	-	-	-	-	-	-	-	-	-	-	-	-	-	-	-	-	-	-	30.3539	30.5058	30.336	30.3073	30.256	-	-	-	-	-	-	-	-	-	-	-	-	-	-	-
			Acidified	10	-	-	-	-	-	-	-	-	-	-	-	-	-	-	-	-	-	-	-	-	-	-	-	-	-	10.1271	10.6826	10.1365	10.2514	10.4866	-	-	-	-	-	-	-	-	-	-	-	-	-	-	-
				20	-	-	-	-	-	-	-	-	-	-	-	-	-	-	-	-	-	-	-	-	-	-	-	-	-	20.2377	20.2004	20.2312	20.2325	20.4878	-	-	-	-	-	-	-	-	-	-	-	-	-	-	-
				30	-	-	-	-	-	-	-	-	-	-	-	-	-	-	-	-	-	-	-	-	-	-	-	-	-	30.3432	30.3253	30.3307	30.2419	30.3521	-	-	-	-	-	-	-	-	-	-	-	-	-	-	-
Measured concentration after spiking - background
	Snow	Spiked with: CLMS-2AN + Mo + Re	Not acidified	10	2.24677	1.98847	1.93723	1.4943	1.09641	9.30208	9.40789	9.10294	9.75108	9.44385	10.0552	10.7795	10.9165	10.5736	10.7998	10.7246	9.308	9.5858	9.73057	9.41897	10.3677	10.53	10.5649	10.1193	10.4121	-	-	-	-	-	10.5791	9.57371	10.2904	11.2449	9.0966	8.86267	8.69105	8.50397	8.60017	8.77537	10.5253	10.6678	10.1586	10.4359	10.1814
				20	4.30968	3.89287	4.41881	4.58003	4.51833	20.748	20.1632	20.483	20.4715	20.6346	20.1853	20.7599	20.9573	20.3633	20.3243	21.1161	19.6199	20.0315	20.4731	18.1043	19.9661	19.1982	20.1146	19.865	20.7094	-	-	-	-	-	20.7184	19.8418	20.911	21.2878	18.9617	18.0204	18.289	17.622	18.1413	18.8919	20.333	20.5105	20.492	20.2375	20.4486
				30	5.08963	5.21692	6.34778	5.84523	4.43708	30.0732	30.8698	30.1781	30.4919	30.3534	30.6086	30.2523	30.2055	30.0824	30.4276	31.1148	30.5538	31.2083	30.8881	29.516	30.6498	30.6221	30.6484	30.2388	30.6095	-	-	-	-	-	30.4918	31.4904	30.2453	30.4058	28.5143	27.9663	28.8758	28.4745	27.8419	26.9245	30.6075	30.1556	30.6714	30.6261	29.8693
			Acidified	10	10.927	10.0636	9.42393	10.7189	9.50082	10.7319	10.8317	10.3676	10.702	10.9019	10.0527	10.2868	10.6952	10.7346	10.0049	10.193	9.72628	10.0211	9.95966	9.87366	10.1606	10.1291	10.5919	10.9588	10.117	-	-	-	-	-	10.4862	9.63251	9.62667	9.98861	8.81854	8.76183	8.76705	8.93667	8.89386	8.61047	9.51249	9.70654	9.01398	9.22486	9.49578
				20	20.6769	19.6815	19.0662	19.178	20.1831	19.794	19.2167	19.4419	19.6894	19.3242	20.7528	20.6988	20.4978	20.8761	20.4712	21.3477	20.7138	20.3438	21.0307	20.5288	20.3151	20.4676	20.9649	20.9607	20.5234	-	-	-	-	-	20.311	20.7409	19.5277	20.2608	18.9206	19.4354	19.2946	19.3308	19.0314	18.039	19.0473	19.9244	19.0022	20.3847	19.3564
				30	30.7742	30.0243	29.3353	29.9704	30.0038	29.969	29.6331	29.2613	29.1705	29.522	30.2815	30.4567	30.6652	30.522	30.669	31.6623	31.3479	31.2268	31.5051	31.2874	30.9833	30.4791	30.4134	30.9358	30.3683	-	-	-	-	-	30.7978	30.464	30.2542	30.3403	27.7958	28.725	29.2413	30.0848	29.9466	29.8084	30.7776	30.2453	30.8216	30.5183	30.9947
		Spiked with: CLMS-1 + Sb + Te + Ti + W + Zr	Not acidified	10	-	-	-	-	-	-	-	-	-	-	-	-	-	-	-	-	-	-	-	-	-	-	-	-	-	10.5469	10.6003	10.0047	10.2196	9.88283	-	-	-	-	-	-	-	-	-	-	-	-	-	-	-
				20	-	-	-	-	-	-	-	-	-	-	-	-	-	-	-	-	-	-	-	-	-	-	-	-	-	20.8019	20.528	20.6592	20.7085	20.3124	-	-	-	-	-	-	-	-	-	-	-	-	-	-	-
				30	-	-	-	-	-	-	-	-	-	-	-	-	-	-	-	-	-	-	-	-	-	-	-	-	-	30.9625	30.9534	31.0409	30.842	30.5873	-	-	-	-	-	-	-	-	-	-	-	-	-	-	-
			Acidified	10	-	-	-	-	-	-	-	-	-	-	-	-	-	-	-	-	-	-	-	-	-	-	-	-	-	10.8906	10.8887	11.0007	10.8431	10.8134	-	-	-	-	-	-	-	-	-	-	-	-	-	-	-
				20	-	-	-	-	-	-	-	-	-	-	-	-	-	-	-	-	-	-	-	-	-	-	-	-	-	20.0928	19.6634	19.767	20.0962	19.9474	-	-	-	-	-	-	-	-	-	-	-	-	-	-	-
				30	-	-	-	-	-	-	-	-	-	-	-	-	-	-	-	-	-	-	-	-	-	-	-	-	-	30.267	30.5825	30.5104	30.5187	30.5365	-	-	-	-	-	-	-	-	-	-	-	-	-	-	-
	Notes:
	-, no data
[truncated: 155 more columns]

## Sheet: Table S4.
Table S4. Release of trace elements from solids to dissolved fraction of TEs (< 0.45 µm). Acidified (A) and not acidified (NA) snow and Milli Q water (MQW) spiked with solid CRMs (coal fly ash, NIST 1633a; Montana soil, NIST 2711; sediment, BCR 320 and road dust) and incubated at 24 hrs at room conditions in the clean air cabinets in the SWAMP lab.
	Ag	As	Ba	Be	Cd	Ce	Co	Cr	Cs	Cu	Dy	Er	Eu	Fe	Ga	Gd	Ho	La	Li	Lu	Mn	Mo	Nd	Ni	Pb	Pr	Rb	Re	Sb	Sm	Sr	Tb	Th	Tl	Tm	U	V	Y	Yb	Zn
	ng/L	ng/L	ng/L	ng/L	ng/L	ng/L	ng/L	ng/L	ng/L	ng/L	ng/L	ng/L	ng/L	ng/L	ng/L	ng/L	ng/L	ng/L	ng/L	ng/L	ng/L	ng/L	ng/L	ng/L	ng/L	ng/L	ng/L	ng/L	ng/L	ng/L	ng/L	ng/L	ng/L	ng/L	ng/L	ng/L	ng/L	ng/L	ng/L	ng/L
MQW (NA)
MQW control	< LOD	< LOD	6.15948	0.176166	< LOD	< LOD	< LOD	< LOD	< LOD	42.5789	< LOD	< LOD	< LOD	< LOD	3.01305	< LOD	< LOD	< LOD	< LOD	< LOD	8.55405	< LOD	< LOD	< LOD	< LOD	< LOD	< LOD	< LOD	< LOD	< LOD	11.3979	< LOD	< LOD	0.206748	< LOD	< LOD	0.160834	< LOD	< LOD	90.4334
NIST 1633a (Coal fly ash)	0.144747	9540.81	64336.4	17.283	77.4143	301.621	59.2191	550.824	12.5168	314.129	54.8763	29.4833	13.8848	957.487	19376.2	63.8122	10.9066	155.063	4493.98	3.13464	474.769	2564.68	191.955	322	3.69544	43.8425	226.565	0.636729	159.295	48.9913	8260.3	9.67061	< LOD	190.161	3.78414	22.817	2367.24	340.673	21.1844	583.124
NIST 2711 (Soil)	37.6654	7486.96	4924.87	1.30694	151.264	56.5655	9.49028	< LOD	2.89978	1237.16	5.8735	3.37217	1.19526	9689.76	1503.68	6.4865	1.22085	29.1572	89.1651	0.487671	868.421	61.9057	31.0378	< LOD	2049.35	7.55415	204.969	0.433885	499.724	6.44275	4676.03	1.03521	14.7934	19.2085	0.476651	10.4001	399.341	31.9478	3.14446	440.518
BCR 320 (Sediment)	0.43355	2092.43	1593.44	0.891656	7.96978	3.8611	27.5214	< LOD	2.15574	444.152	0.836011	0.700442	0.226038	2103.7	489.938	0.730025	0.222622	1.62791	23.2836	0.140302	5179.82	21.2373	2.44842	24.8112	6.96958	0.570787	152.234	< LOD	6.12843	0.688935	995.253	0.123646	0.496437	5.34352	0.123982	12.306	76.1709	5.89626	0.744907	362.791
Road dust	< LOD	23.9382	488.913	1.72579	0.320112	0.70974	119.293	< LOD	1.63077	60.3673	0.174657	0.120012	0.0750235	135.871	150.178	0.169964	< LOD	0.268814	188.865	< LOD	2558.86	9.04653	0.710447	80.6978	< LOD	0.210155	138.595	< LOD	3.18113	0.19327	1631.74	0.0279673	0.308212	0.707118	0.0108371	0.16925	107.836	0.950213	< LOD	231.705
MQW (A)
MQW control	< LOD	0.913746	< LOD	< LOD	< LOD	< LOD	< LOD	< LOD	< LOD	54.8796	< LOD	< LOD	< LOD	< LOD	< LOD	< LOD	< LOD	< LOD	< LOD	< LOD	< LOD	< LOD	< LOD	< LOD	< LOD	< LOD	< LOD	< LOD	1.19108	< LOD	1.81816	< LOD	< LOD	0.198603	< LOD	< LOD	< LOD	< LOD	< LOD	199.394
NIST 1633a (Coal fly ash)	5.62365	62045.1	283168	449.422	150.455	6103.11	777.121	4585.74	85.0973	6106.49	705.362	362.575	190.765	725767	86350.9	854.12	134.528	2915.64	7286.65	39.361	5871.71	9473.29	3257.8	2508.36	2353.78	796.113	948.01	1.3823	598.281	788.607	50743.7	126.878	593.023	884.028	47.8281	682.933	19937.1	3758.81	280.409	7270.45
NIST 2711 (Soil)	376.232	26338	58277.2	224.464	14469.5	9003.76	1507.42	814.506	63.1292	22796.7	739.756	393.295	155.761	755999	17657.7	924.236	142.003	4413.07	763.885	45.0494	143177	183.814	4520.45	2095.41	406717	1157.34	1923.71	0.74959	2771.38	977.674	13333.8	135.513	40.34	251.82	52.8503	141.01	2629.98	4058.63	317.69	58781.9
BCR 320 (Sediment)	12.3075	25357	34022.5	97.1388	165.417	1828.09	2114.09	4797.81	726.995	8906.82	368.852	210.093	53.169	4.19156e+06	10817.2	348.65	73.0232	791.819	4239.82	27.3253	76396.2	74.5848	997.059	5414.28	10553.6	234.932	10287.7	0.118204	45.5542	289.601	5070.34	62.2962	87.3543	74.7058	30.2482	470.773	6117.88	2088.75	188.059	22232.9
Road dust	< LOD	329.345	9313.8	79.6078	13.1763	4847.81	1344.97	427.506	108.584	810.762	281.691	129.854	99.908	1.87962e+06	2973.92	403.616	50.3761	1772.38	376.358	13.9125	138717	43.7012	2101.7	2045.41	969.813	528.351	1285.92	0.112908	12.9117	450.193	7949.49	55.5399	399.562	8.20373	16.4689	146.346	1595.89	1293.73	98.098	2642.28
Snow (NA)
Snow blank (control)	< LOD	12.0947	1629.19	0.121717	3.23758	1.04183	9.40801	< LOD	1.2248	108.482	0.175273	0.222267	0.108626	< LOD	515.369	0.226023	< LOD	0.706177	3.13297	< LOD	310.613	15.9868	1.08365	< LOD	3.88165	0.265571	11.8939	< LOD	15.2883	0.323293	358.013	< LOD	< LOD	9.43852	< LOD	0.176363	9.22581	1.87505	0.219291	1876.25
NIST 1633a (Coal fly ash)	< LOD	10048.7	66798.9	5.73616	61.2303	93.1355	57.3976	490.977	22.973	139.168	16.0777	9.07671	5.15201	93.1818	20621.2	18.6759	3.32475	49.6719	4297.13	1.03994	708.113	2589.59	60.1935	290.078	4.6267	13.7909	303.186	0.557538	164.125	14.7311	7936.04	2.79949	0.173314	309.875	1.16015	7.51973	2193.64	110.446	6.68473	1602.73
NIST 2711 (Soil)	34.132	7487.14	5705.37	1.91426	146.403	71.2323	12.4488	< LOD	3.97013	1339.19	7.38887	4.15467	1.47656	14004	1761.57	8.19237	1.39606	36.6018	105.891	0.513713	1058.8	85.9286	37.1679	< LOD	2587.79	9.66331	308.284	0.416567	519.182	8.30902	4942.54	1.27827	17.5346	29.974	0.61211	10.3751	417.014	39.1158	3.88281	758.781
BCR 320 (Sediment)	< LOD	2896.75	3100.98	0.705444	10.0184	5.06688	29.3577	3.91709	2.10878	831.583	1.12126	0.963204	0.288349	3830.49	961.001	1.15898	0.278261	2.35492	28.7116	0.17879	7812.69	50.8023	3.77285	62.8722	18.2319	0.7983	106.22	< LOD	24.9525	0.88847	2198.68	0.148578	0.588208	6.494	0.149483	15.5066	112.01	8.29853	1.13513	520.209
Road dust	< LOD	34.301	1493.49	1.48133	0.620961	0.774226	157.947	< LOD	4.43571	74.9318	0.185399	0.123853	< LOD	< LOD	464.104	0.186228	< LOD	0.307483	228.627	< LOD	3682.5	30.6974	0.62817	114.287	< LOD	0.152642	189.809	< LOD	18.3039	< LOD	3458.09	< LOD	< LOD	6.13668	< LOD	0.241571	104.28	0.921738	0.141135	674.573
Snow (A)
Snow blank (control)	< LOD	14.2138	1612.88	0.374246	2.86193	1.72903	9.6535	< LOD	1.21512	94.7141	0.220439	0.166816	0.115829	< LOD	482.598	0.294833	< LOD	1.20575	5.01221	< LOD	297.714	14.0621	1.25204	< LOD	4.50905	0.368915	12.2982	< LOD	16.7476	0.309079	343.472	< LOD	< LOD	9.32135	< LOD	0.191633	8.88212	2.10236	0.132043	1912.94
NIST 1633a (Coal fly ash)	3.20123	53432.6	241993	390.586	136.142	5593.05	716.332	4013.07	78.6502	5127.81	634.503	325.703	174.067	650502	71664.4	772.104	121.04	2661.84	6436.08	35.9174	6632.31	8168.37	2976.77	2261.66	2172.61	726.778	874.263	1.12644	553.078	718.205	45648.2	114.168	550.968	794.753	43.3049	614.035	17506.4	3323.48	252.397	7986.38
NIST 2711 (Soil)	349.567	25236.2	58059.1	197.135	13915	8911.17	1463.78	797.227	63.4024	22296	742.163	388.72	155.522	724616	17306.9	920.977	141.229	4381.81	652.043	45.2754	140055	183.315	4480.12	2018.76	404880	1146.17	1860.3	0.800748	2714.79	975.17	13283.6	133.898	42.7738	262.464	52.7572	145.237	2519.17	3976.87	315.799	57993.8
BCR 320 (Sediment)	9.42242	25587.2	35907	86.6002	170.41	1817.51	2155.72	4562.41	723.475	9283.98	356.509	207.51	54.8855	4.11296e+06	11072.5	348.316	72.1116	849.93	3609.55	28.2471	74009.7	75.2581	1048.27	5518.94	11143.1	249.709	9720.14	0.143833	58.5478	292.01	5641.75	59.6202	98.3763	83.4401	29.6849	506.792	5826.66	1994.81	186.423	23526.1
Road dust	< LOD	326.036	9298.32	60.7586	15.81	4132.05	1477.38	345.487	82.9456	833.446	246.912	112.522	87.0022	1.4396e+06	2921.36	355.784	43.4646	1454.04	313.739	12.143	111506	52.9406	1775.14	2165.88	1058.4	441.538	929.498	< LOD	25.7269	391.062	7498.8	48.9328	323.893	15.3915	14.4435	136.17	1361.25	1113.15	84.1322	4384.82

## Sheet: Table S5.
Table S5. Concentration of "dissolved" (filterable through 0.45 µm), acid soluble, particulate, total trace elements (TEs), and TE in dust extracted from snow samples collected in 2015 from different peat bogs: MIL, JPH4, McK, McM and ANZ. The results shown in the table are average concentration of triplicate samples ± 1 std. dev. For particulate TE, the percentage of particulate TE is given in p…
	Bitumen enriched elements				Potentially toxic elements					Conservative lithophile elements
	V	Ni	Mo		Cd	Pb	Sb	Tl		La	Th
	µg/L	µg/L	ng/L		ng/L	ng/L	ng/L	ng/L		ng/L	ng/L
	Snow sample
Dissolved/Filterable trace elements (< 0.45 µm)
Mck	0.5 ± 0.0	0.2 ± 0.0	81.6 ± 4.6		1.4 ± 0.4	3.4 ± 1.3	15.7 ± 0.4	4.4 ± 0.3		10.5 ± 12.3	1.7 ± 0.1
JPH 4	0.1 ± 0.1	0.2 ± 0.1	85.2 ± 18.7		0.9 ± 0.9	4.8 ± 5.0	20.8 ± 10.3	3.9 ± 0.8		3.9 ± 3.9	1.2 ± 0.1
MIL	0.2 ± 0.0	0.2 ± 0.0	172.4 ± 34.2		1.0 ± 1.0	2.3 ± 1.2	36.0 ± 3.4	6.7 ± 0.9		2.9 ± 0.3	1.9 ± 0.2
McM	0.1 ± 0.0	0.2 ± 0.0	40.5 ± 7.8		2.9 ± 0.3	4.7 ± 1.8	15.4 ± 0.9	2.1 ± 0.1		3.4 ± 2.3	2.2 ± 0.5
ANZ	0.2 ± 0.1	0.4 ± 0.2	22.2 ± 5.1		4.5 ± 1.4	5.6 ± 2.7	11.2 ± 0.4	0.9 ± 0.3		2.1 ± 2.1	2.2 ± 0.1
Acid soluble trace elements
Mck	1.4 ± 0.4	2.8 ± 0.6	79 ± 44.1		10.6 ± 1.3	424.9 ± 105.2	20.1 ± 2.0	7.5 ± 1.9		546.8 ± 147.8	23.9 ± 11.4
JPH 4	2.9 ± 0.2	6.5 ± 2.7	68.1 ± 6.4		15.4 ± 5.1	742.7 ± 228.8	29.3 ± 7.1	16.2 ± 5.8		1075.9 ± 238.1	122.5 ± 56.9
MIL	14.4 ± 12.5	4.2 ± 0.5	107.1 ± 28.8		15.3 ± 2.2	611.7 ± 121.5	58.5 ± 0.5	9.8 ± 0.7		586.3 ± 55.7	29.1 ± 3.9
McM	0.3 ± 0.1	0.8 ± 0.1	42.4 ± 5.0		6.3 ± 1.8	155.4 ± 26.7	15.5 ± 2.7	2.4 ± 1.4		104.6 ± 26.8	3.5 ± 2.6
ANZ	1.8 ± 2.0	2.6 ± 2.2	181.9 ± 79.5		8.6 ± 2.9	92.9 ± 32.1	22.2 ± 10.6	1.2 ± 0.6		46 ± 19.0	0.8 ± 0.4
Particulate trace elements
Mck	33.7 (99)	14.8 (99)	1417.4 (95)		21 (94)	506.6 (99)	118.8 (88)	27.7 (86)		1706.4 (99)	393.3 (100)
JPH 4	32.3 (100)	17.8 (99)	2061.5 (96)		19.7 (96)	605.2 (99)	284.4 (93)	44.3 (92)		2674.3 (100)	784.8 (100)
MIL	53 (100)	23.9 (99)	2870.2 (94)		38.4 (97)	982.7 (100)	209.6 (85)	48 (88)		4151 (100)	614.1 (100)
McM	17.3 (100)	9.5 (98)	1372.8 (97)		13.4 (82)	245.3 (98)	142.5 (90)	14.2 (87)		781.5 (100)	235.1 (99)
ANZ	8.2 (98)	7.9 (95)	1343.7 (98)		14.8 (77)	214.4 (97)	134.1 (92)	9.5 (91)		189.2 (99)	80.4 (97)
Total trace elements
Mck	34.2 ± 1.8	15 ± 2.7	1499 ± 255.5		22.4 ± 1.8	510 ± 120.0	134.5 ± 3.3	32.2 ± 3.8		1716.9 ± 12.5	395 ± 115.9
JPH 4	32.5 ± 3.3	17.9 ± 1.7	2146.7 ± 350.5		20.6 ± 0.5	610 ± 270.0	305.2 ± 62.8	48.2 ± 8.7		2678.2 ± 301.3	786 ± 362.7
MIL	53.2 ± 6.4	24.1 ± 3.1	3042.5 ± 444.1		39.4 ± 0.9	985 ± 130.0	245.5 ± 14.0	54.7 ± 3.4		4153.9 ± 334.9	616 ± 84.4
McM	17.3 ± 1.6	9.7 ± 1.3	1413.3 ± 645.0		16.4 ± 1.0	250 ± 32.0	157.9 ± 11.6	16.3 ± 2.2		784.9 ± 23.3	237.3 ± 86.4
ANZ	8.3 ± 0.8	8.3 ± 0.7	1366 ± 384.2		19.3 ± 5.2	220 ± 35.0	145.3 ± 17.9	10.4 ± 4.2		191.3 ± 13.4	82.6 ± 20.0
Trace elements in dust
	V	Ni	Mo		Cd	Pb	Sb	Tl		La	Th
	mg/kg	mg/kg	mg/kg		µg/kg	mg/kg	µg/kg	µg/kg		mg/kg	mg/kg
Mck	6.6 ± 0.5	4.6 ± 1.1	0.5 ± 0.1		13.3 ± 0.5	0.7 ± 0.1	45.0 ± 3.0	19.1 ± 2.0		1.3 ± 0.2	0.4 ± 0.0
JPH 4	8.8 ± 5.3	3.8 ± 1.5	0.6 ± 0.3		17.6 ± 7.1	1.2 ± 0.6	55.8 ± 18.1	37.6 ± 16.3		2.8 ± 1.4	0.8 ± 0.4
MIL	17.5 ± 1.7	6.7 ± 0.8	1.0 ± 0.2		26.0 ± 3.4	1.1 ± 0.1	85.5 ± 9.1	31.7 ± 4.0		2.2 ± 0.2	0.6 ± 0.1
McM	2.7 ± 0.6	1.7 ± 0.3	0.3 ± 0.0		8.3 ± 1.2	0.4 ± 0.1	31.2 ± 7.0	9.4 ± 1.8		0.7 ± 0.2	0.2 ± 0.1
ANZ	1.6 ± 0.4	2.2 ± 0.5	0.2 ± 0.0		6.2 ± 0.7	0.3 ± 0.1	27.8 ± 13.7	5.7 ± 2.4		0.3 ± 0.1	0.1 ± 0.1

## Sheet: Table S7.
	Table S7. Concentration of acid soluble elements (TEs) in snow samples collected in 2015 from different peat bogs: MIL, JPH4, McK, McM and ANZ. The results shown in the table are average concentration of triplicate samples ± 1 std. dev.
			Bitumen enriched elements						Potentially toxic elements								Conservative lithophile elements
			V		Ni		Mo		Cd		Pb		Sb		Tl		La		Th
		ft from surface	Average	Stdev	Average	Stdev	Average	Stdev	Average	Stdev	Average	Stdev	Average	Stdev	Average	Stdev	Average	Stdev	Average	Stdev
			µg/L		µg/L		ng/L		ng/L		ng/L		ng/L		ng/L		ng/L		ng/L
Mck	Top	0.5	1.4173	0.454079	2.74525	0.701321	55.2648	18.1752	9.11862	1.5225	415.27	87.4358	20.003	5.83214	7.51657	1.53861	499.122	147.384	26.0678	2.57526
	Middle	1	1.76345	0.106414	3.4	0.334029	51.9534	12.1314	11.3514	1.60765	534.753	38.6162	22.1718	1.43358	9.30549	0.890258	712.558	91.4884	34.0739	1.4969
	Bottom	1.5	1.01069	0.100903	2.11602	0.226548	129.857	101.222	11.2478	1.5309	324.932	37.0204	18.2103	8.11751	5.59644	0.258905	428.663	19.7214	11.6586	6.30951
JPH 4	Top	0.5	2.63623	0.667034	4.41518	1.10841	63.5399	18.2256	11.2414	3.24758	541.666	119.464	24.1144	7.68896	11.8755	2.80136	892.647	354.393	90.12	48.8031
	Middle	1	3.06687	0.387896	5.57662	0.656398	75.423	10.0164	13.966	1.17544	694.971	41.9805	26.3599	2.52213	13.8886	1.62754	990.014	169.198	89.1586	8.43734
	Bottom	1.5	2.90267	0.882668	9.49421	4.22427	65.3437	7.69351	21.0721	7.13202	991.666	334.423	37.3435	7.03995	22.7532	9.07438	1345.1	540.707	188.104	91.1189
MIL	Top	0.5	11.2531	9.45086	3.73242	0.368301	79.8537	1.98937	17.6679	9.53659	471.514	70.7493	58.1885	13.2063	9.13361	0.886168	530.485	10.4525	24.5689	7.48348
	Middle	1	28.1768	11.0826	4.79884	0.658574	104.327	40.1959	13.2929	2.37188	678.55	134.682	58.1463	11.0231	10.5571	1.61244	586.522	108.351	31.1608	11.4979
	Bottom	1.5	3.66798	0.835855	4.21319	1.40607	137.213	7.11295	15.0597	3.47402	685.092	357.567	59.1159	6.13871	9.66154	3.41004	641.932	256.468	31.6107	20.4393
McM	Top	0.5	0.441246	0.0212912	0.773681	0.0848706	39.6756	5.10848	5.19029	0.478863	135.638	34.0827	18.2142	2.95545	1.43465	0.349012	76.5441	10.8468	1.89337	0.471895
	Middle	1	0.325169	0.0712614	0.621386	0.0986679	48.0795	8.55599	5.35855	0.655816	144.84	28.2879	15.4542	1.94576	1.63352	0.259748	107.231	41.3867	2.14601	0.23147
	Bottom	1.5	0.272734	0.0740427	0.890486	0.305392	39.3209	4.83357	8.30319	1.79445	185.832	61.2759	12.8439	1.46158	3.98725	2.66259	130.029	30.4932	6.50469	3.34656
ANZ	Top	0.5	4.11349	0.116226	4.91824	1.53698	262.497	30.9492	11.6491	2.08577	74.9627	1.7645	11.1318	2.32782	0.868692	0.0604509	30.3814	3.93252	0.47351	0.0823885
	Middle	1	0.967875	0.125498	2.18591	0.40353	179.764	37.9304	8.29024	0.910441	130.052	7.67224	32.2487	8.58545	1.88121	0.560212	67.2258	5.41386	1.29437	0.239623
	Bottom	1.5	0.380102	0.248394	0.611003	0.356067	103.572	41.7075	5.79215	1.35493	73.8491	26.7066	23.2659	1.8699	0.983794	0.318632	40.3367	14.0181	0.708992	0.172671

## Sheet: Table S8.
	Table S8. Comparison of TE ratios in snow from ABS versus TE ratios in bulk ABS and its bitumen and mineral fractions. The TE concentrations in ABS, bitumen and mineral fractions are taken from Bicalho et al., (2017).
	Current study					Bicalho et al., 2017
	Snow					Bulk ABS	Mineral	Bitumen
	Dissolved	Acid soluble	Particulate	Total	Dust
	ng/L	µg/L	µg/L	µg/L	mg/kg	mg/kg	mg/kg	mg/kg
Trace elements enriched in bitumen
V	220	4.2	28.9	29.1	7.4	38.6	8.8	242
Ni	240	3.4	14.78	15	3.8	14.6	3.8	83.3
Mo	80.4	0.0957	1.8131	1.8935	0.5	1.6	0.2	10.4
Potentially toxic trace elements
Cd	2.1	0.0112	0.0215	0.0236	0.01428	0.03	0.02	0.02
Pb	4.2	0.4056	0.5108	0.515	0.7	5.2	4.5	0.7
Sb	19.8	0.0291	0.1779	0.1977	0.04906	0.04	0.04	0.03
Tl	3.6	0.0074	0.0288	0.0324	0.0207	0.09	0.09	0.007
Conservative lithophile elements
La	4.6	0.4719	1.9005	1.905	1.5	NOT REPORTED
Th	1.8	0.036	0.4215	0.4234	0.4	2.9	1.5	0.14
TE Ratios
V/Ni	0.916667	1.23529	1.95535	1.94	1.94737	2.64384	2.31579	2.90516
V/Mo	2.73632	43.8871	15.9396	15.3684	14.8	24.125	44	23.2692
Ni/Mo	2.98507	35.5277	8.15178	7.92184	7.6	9.125	19	8.00962
